# Supplementary material for: Global characterization of somatic mutations and DNA methylation changes during vegetative propagation in strawberries
Source: HighWire-hosted journal article supplement (doi:10.1101/gr.279378.124), 2024-10-01
Supplement: Supplemental_Data.zip [file Original_data_of_mutations_1.xlsx]

## Sheet: Sheet1
Mutation frequency (number of mutations per site) of different transition and transversion types in regenerated woodland strawberry plants and 12 'Beni hoppe' individuals.
Sample types	Sample ID	Types of SNV mutation site	Number of mutation site	Covered bases	Mutation frequency (Mutation/covered bases)
Regenerated woodland strawberry plants	LS_rep1	A:T>G:C	2	215334078	9.2879e-09
		C:G>T:A	9	215334078	4.17955e-08
		A:T>T:A	0	215334078	0
		A:T>C:G	8	215334078	3.71516e-08
		C:G>G:C	1	215334078	4.6439e-09
		C:G>A:T	1	215334078	4.6439e-09
	LS_rep2	A:T>G:C	10	204231154	4.89641e-08
		C:G>T:A	13	204231154	6.36534e-08
		A:T>T:A	3	204231154	1.46892e-08
		A:T>C:G	65	204231154	3.18267e-07
		C:G>G:C	3	204231154	1.46892e-08
		C:G>A:T	5	204231154	2.44821e-08
	LS_rep3	A:T>G:C	6	214898308	2.79202e-08
		C:G>T:A	7	214898308	3.25735e-08
		A:T>T:A	5	214898308	2.32668e-08
		A:T>C:G	4	214898308	1.86135e-08
		C:G>G:C	1	214898308	4.6534e-09
		C:G>A:T	2	214898308	9.3067e-09
	LS_rep4	A:T>G:C	2	214891000	9.307e-09
		C:G>T:A	6	214891000	2.79211e-08
		A:T>T:A	3	214891000	1.39606e-08
		A:T>C:G	3	214891000	1.39606e-08
		C:G>G:C	0	214891000	0
		C:G>A:T	1	214891000	4.6535e-09
	LS_rep5	A:T>G:C	6	215320011	2.78655e-08
		C:G>T:A	8	215320011	3.7154e-08
		A:T>T:A	2	215320011	9.2885e-09
		A:T>C:G	13	215320011	6.03753e-08
		C:G>G:C	2	215320011	9.2885e-09
		C:G>A:T	1	215320011	4.6443e-09
	LS_rep6	A:T>G:C	2	215281784	9.2901e-09
		C:G>T:A	10	215281784	4.64507e-08
		A:T>T:A	2	215281784	9.2901e-09
		A:T>C:G	8	215281784	3.71606e-08
		C:G>G:C	0	215281784	0
		C:G>A:T	1	215281784	4.6451e-09
	HS_rep1	A:T>G:C	6	214651392	2.79523e-08
		C:G>T:A	5	214651392	2.32936e-08
		A:T>T:A	3	214651392	1.39761e-08
		A:T>C:G	11	214651392	5.12459e-08
		C:G>G:C	1	214651392	4.6587e-09
		C:G>A:T	1	214651392	4.6587e-09
	HS_rep2	A:T>G:C	8	215174876	3.71791e-08
		C:G>T:A	12	215174876	5.57686e-08
		A:T>T:A	6	215174876	2.78843e-08
		A:T>C:G	4	215174876	1.85895e-08
		C:G>G:C	1	215174876	4.6474e-09
		C:G>A:T	4	215174876	1.85895e-08
	HS_rep3	A:T>G:C	4	215219319	1.85857e-08
		C:G>T:A	14	215219319	6.50499e-08
		A:T>T:A	3	215219319	1.39393e-08
		A:T>C:G	5	215219319	2.32321e-08
		C:G>G:C	1	215219319	4.6464e-09
		C:G>A:T	3	215219319	1.39393e-08
	HS_rep4	A:T>G:C	0	214767106	0
		C:G>T:A	5	214767106	2.3281e-08
		A:T>T:A	0	214767106	0
		A:T>C:G	1	214767106	4.6562e-09
		C:G>G:C	0	214767106	0
		C:G>A:T	1	214767106	4.6562e-09
	HS_rep5	A:T>G:C	5	215189268	2.32354e-08
		C:G>T:A	52	215189268	2.41648e-07
		A:T>T:A	44	215189268	2.04471e-07
		A:T>C:G	12	215189268	5.57649e-08
		C:G>G:C	4	215189268	1.85883e-08
		C:G>A:T	4	215189268	1.85883e-08
	HS_rep6	A:T>G:C	2	215018567	9.3015e-09
		C:G>T:A	2	215018567	9.3015e-09
		A:T>T:A	3	215018567	1.39523e-08
		A:T>C:G	5	215018567	2.32538e-08
		C:G>G:C	1	215018567	4.6508e-09
		C:G>A:T	2	215018567	9.3015e-09
	LL_rep1	A:T>G:C	9	215094212	4.18421e-08
		C:G>T:A	184	215094212	8.55439e-07
		A:T>T:A	66	215094212	3.06842e-07
		A:T>C:G	14	215094212	6.50878e-08
		C:G>G:C	5	215094212	2.32456e-08
		C:G>A:T	10	215094212	4.64913e-08
	LL_rep2	A:T>G:C	2	215033105	9.3009e-09
		C:G>T:A	118	215033105	5.48753e-07
		A:T>T:A	30	215033105	1.39513e-07
		A:T>C:G	5	215033105	2.32522e-08
		C:G>G:C	3	215033105	1.39513e-08
		C:G>A:T	7	215033105	3.25531e-08
	LL_rep3	A:T>G:C	4	215033660	1.86017e-08
		C:G>T:A	92	215033660	4.2784e-07
		A:T>T:A	61	215033660	2.83677e-07
		A:T>C:G	4	215033660	1.86017e-08
		C:G>G:C	5	215033660	2.32522e-08
		C:G>A:T	14	215033660	6.51061e-08
	LL_rep4	A:T>G:C	6	215544830	2.78364e-08
		C:G>T:A	92	215544830	4.26825e-07
		A:T>T:A	54	215544830	2.50528e-07
		A:T>C:G	9	215544830	4.17547e-08
		C:G>G:C	7	215544830	3.24758e-08
		C:G>A:T	3	215544830	1.39182e-08
	LL_rep5	A:T>G:C	16	215500155	7.42459e-08
		C:G>T:A	237	215500155	1.09977e-06
		A:T>T:A	171	215500155	7.93503e-07
		A:T>C:G	32	215500155	1.48492e-07
		C:G>G:C	4	215500155	1.85615e-08
		C:G>A:T	9	215500155	4.17633e-08
	LL_rep6	A:T>G:C	4	215383014	1.85716e-08
		C:G>T:A	81	215383014	3.76074e-07
		A:T>T:A	27	215383014	1.25358e-07
		A:T>C:G	8	215383014	3.71431e-08
		C:G>G:C	5	215383014	2.32145e-08
		C:G>A:T	3	215383014	1.39287e-08
	HL_rep1	A:T>G:C	13	215172138	6.04167e-08
		C:G>T:A	220	215172138	1.02244e-06
		A:T>T:A	81	215172138	3.76443e-07
		A:T>C:G	11	215172138	5.11219e-08
		C:G>G:C	9	215172138	4.1827e-08
		C:G>A:T	14	215172138	6.50642e-08
	HL_rep2	A:T>G:C	33	215119741	1.53403e-07
		C:G>T:A	167	215119741	7.76312e-07
		A:T>T:A	362	215119741	1.68278e-06
		A:T>C:G	72	215119741	3.34697e-07
		C:G>G:C	12	215119741	5.57829e-08
		C:G>A:T	9	215119741	4.18372e-08
	HL_rep3	A:T>G:C	22	215118557	1.02269e-07
		C:G>T:A	234	215118557	1.08777e-06
		A:T>T:A	210	215118557	9.76206e-07
		A:T>C:G	41	215118557	1.90593e-07
		C:G>G:C	6	215118557	2.78916e-08
		C:G>A:T	19	215118557	8.83234e-08
	HL_rep4	A:T>G:C	9	214954005	4.18694e-08
		C:G>T:A	143	214954005	6.65259e-07
		A:T>T:A	167	214954005	7.7691e-07
		A:T>C:G	27	214954005	1.25608e-07
		C:G>G:C	13	214954005	6.04781e-08
		C:G>A:T	26	214954005	1.20956e-07
	HL_rep5	A:T>G:C	20	215350577	9.28718e-08
		C:G>T:A	158	215350577	7.33687e-07
		A:T>T:A	234	215350577	1.0866e-06
		A:T>C:G	42	215350577	1.95031e-07
		C:G>G:C	21	215350577	9.75154e-08
		C:G>A:T	40	215350577	1.85744e-07
	HL_rep6	A:T>G:C	17	215132204	7.90212e-08
		C:G>T:A	194	215132204	9.01771e-07
		A:T>T:A	357	215132204	1.65944e-06
		A:T>C:G	58	215132204	2.69602e-07
		C:G>G:C	7	215132204	3.25381e-08
		C:G>A:T	19	215132204	8.83178e-08
	CA_rep1	A:T>G:C	14	215020830	6.511e-08
		C:G>T:A	217	215020830	1.0092e-06
		A:T>T:A	236	215020830	1.09757e-06
		A:T>C:G	71	215020830	3.30201e-07
		C:G>G:C	13	215020830	6.04593e-08
		C:G>A:T	15	215020830	6.97607e-08
	CA_rep2	A:T>G:C	24	214654086	1.11808e-07
		C:G>T:A	193	214654086	8.99121e-07
		A:T>T:A	239	214654086	1.11342e-06
		A:T>C:G	47	214654086	2.18957e-07
		C:G>G:C	13	214654086	6.05626e-08
		C:G>A:T	35	214654086	1.63053e-07
	CA_rep3	A:T>G:C	20	214681109	9.31614e-08
		C:G>T:A	159	214681109	7.40633e-07
		A:T>T:A	179	214681109	8.33795e-07
		A:T>C:G	29	214681109	1.35084e-07
		C:G>G:C	8	214681109	3.72646e-08
		C:G>A:T	29	214681109	1.35084e-07
‘Beni hoppe’ individuals	HY_00	A:T>G:C	1433	774079838	1.85123e-06
		C:G>T:A	1695	774079838	2.1897e-06
		A:T>T:A	421	774079838	5.43872e-07
		A:T>C:G	404	774079838	5.2191e-07
		C:G>G:C	313	774079838	4.04351e-07
		C:G>A:T	487	774079838	6.29134e-07
	HY_01	A:T>G:C	1281	768778082	1.66628e-06
		C:G>T:A	1639	768778082	2.13195e-06
		A:T>T:A	406	768778082	5.28111e-07
		A:T>C:G	368	768778082	4.78682e-07
		C:G>G:C	285	768778082	3.70718e-07
		C:G>A:T	472	768778082	6.13961e-07
	HY_02	A:T>G:C	1305	768681594	1.69771e-06
		C:G>T:A	1731	768681594	2.25191e-06
		A:T>T:A	434	768681594	5.64603e-07
		A:T>C:G	374	768681594	4.86547e-07
		C:G>G:C	252	768681594	3.27834e-07
		C:G>A:T	479	768681594	6.23145e-07
	HY_03	A:T>G:C	1332	768495321	1.73326e-06
		C:G>T:A	1773	768495321	2.30711e-06
		A:T>T:A	451	768495321	5.86861e-07
		A:T>C:G	411	768495321	5.34811e-07
		C:G>G:C	307	768495321	3.99482e-07
		C:G>A:T	489	768495321	6.36308e-07
	HY_04	A:T>G:C	1256	768762555	1.63379e-06
		C:G>T:A	1615	768762555	2.10078e-06
		A:T>T:A	402	768762555	5.22918e-07
		A:T>C:G	372	768762555	4.83895e-07
		C:G>G:C	273	768762555	3.55116e-07
		C:G>A:T	480	768762555	6.2438e-07
	HY_05	A:T>G:C	1342	768715626	1.74577e-06
		C:G>T:A	1715	768715626	2.23099e-06
		A:T>T:A	405	768715626	5.26853e-07
		A:T>C:G	377	768715626	4.90428e-07
		C:G>G:C	283	768715626	3.68147e-07
		C:G>A:T	500	768715626	6.50436e-07
	HY_06	A:T>G:C	1148	767512316	1.49574e-06
		C:G>T:A	1604	767512316	2.08987e-06
		A:T>T:A	379	767512316	4.93803e-07
		A:T>C:G	374	767512316	4.87289e-07
		C:G>G:C	268	767512316	3.4918e-07
		C:G>A:T	481	767512316	6.267e-07
	HY_07	A:T>G:C	1300	768465146	1.69168e-06
		C:G>T:A	1689	768465146	2.19789e-06
		A:T>T:A	428	768465146	5.56954e-07
		A:T>C:G	385	768465146	5.00999e-07
		C:G>G:C	295	768465146	3.83882e-07
		C:G>A:T	505	768465146	6.57154e-07
	HY_08	A:T>G:C	1079	767461932	1.40593e-06
		C:G>T:A	1424	767461932	1.85547e-06
		A:T>T:A	360	767461932	4.69079e-07
		A:T>C:G	326	767461932	4.24777e-07
		C:G>G:C	253	767461932	3.29658e-07
		C:G>A:T	429	767461932	5.58985e-07
	HY_09	A:T>G:C	1230	768241697	1.60106e-06
		C:G>T:A	1583	768241697	2.06055e-06
		A:T>T:A	395	768241697	5.14161e-07
		A:T>C:G	340	768241697	4.42569e-07
		C:G>G:C	257	768241697	3.3453e-07
		C:G>A:T	476	768241697	6.19597e-07
	HY_10	A:T>G:C	1171	768207366	1.52433e-06
		C:G>T:A	1543	768207366	2.00857e-06
		A:T>T:A	392	768207366	5.10279e-07
		A:T>C:G	338	768207366	4.39985e-07
		C:G>G:C	282	768207366	3.67088e-07
		C:G>A:T	467	768207366	6.07909e-07
	HY_11	A:T>G:C	1250	767718095	1.6282e-06
		C:G>T:A	1629	767718095	2.12187e-06
		A:T>T:A	397	767718095	5.17117e-07
		A:T>C:G	346	767718095	4.50686e-07
		C:G>G:C	256	767718095	3.33456e-07
		C:G>A:T	465	767718095	6.05691e-07

## Sheet: Sheet2
Mutation frequency (number of mutations per site) of all transitions and transversions in regenerated woodland strawberry plants and 12 'Beni hoppe' individuals.
Sample types	Sample ID	Types of SNV mutation site	Number of mutation site	Covered bases	Mutation frequency (Mutation/covered bases)
Regenerated woodland strawberry plants	LS_rep1	Transition	11	215334078	5.10834e-08
		Transversion	10	215334078	4.64395e-08
	LS_rep2	Transition	23	204231154	1.12617e-07
		Transversion	76	204231154	3.72127e-07
	LS_rep3	Transition	13	214898308	6.04937e-08
		Transversion	12	214898308	5.58404e-08
	LS_rep4	Transition	8	214891000	3.72282e-08
		Transversion	7	214891000	3.25747e-08
	LS_rep5	Transition	14	215320011	6.50195e-08
		Transversion	18	215320011	8.35965e-08
	LS_rep6	Transition	12	215281784	5.57409e-08
		Transversion	11	215281784	5.10958e-08
	HS_rep1	Transition	11	214651392	5.12459e-08
		Transversion	16	214651392	7.45395e-08
	HS_rep2	Transition	20	215174876	9.29477e-08
		Transversion	15	215174876	6.97107e-08
	HS_rep3	Transition	18	215219319	8.36356e-08
		Transversion	12	215219319	5.57571e-08
	HS_rep4	Transition	5	214767106	2.3281e-08
		Transversion	2	214767106	9.3124e-09
	HS_rep5	Transition	57	215189268	2.64883e-07
		Transversion	64	215189268	2.97413e-07
	HS_rep6	Transition	4	215018567	1.8603e-08
		Transversion	11	215018567	5.11584e-08
	LL_rep1	Transition	193	215094212	8.97281e-07
		Transversion	95	215094212	4.41667e-07
	LL_rep2	Transition	120	215033105	5.58054e-07
		Transversion	45	215033105	2.0927e-07
	LL_rep3	Transition	96	215033660	4.46442e-07
		Transversion	84	215033660	3.90637e-07
	LL_rep4	Transition	98	215544830	4.54662e-07
		Transversion	73	215544830	3.38677e-07
	LL_rep5	Transition	253	215500155	1.17401e-06
		Transversion	216	215500155	1.00232e-06
	LL_rep6	Transition	85	215383014	3.94646e-07
		Transversion	43	215383014	1.99644e-07
	HL_rep1	Transition	233	215172138	1.08285e-06
		Transversion	115	215172138	5.34456e-07
	HL_rep2	Transition	200	215119741	9.29715e-07
		Transversion	455	215119741	2.1151e-06
	HL_rep3	Transition	256	215118557	1.19004e-06
		Transversion	276	215118557	1.28301e-06
	HL_rep4	Transition	152	214954005	7.07128e-07
		Transversion	233	214954005	1.08395e-06
	HL_rep5	Transition	178	215350577	8.26559e-07
		Transversion	337	215350577	1.56489e-06
	HL_rep6	Transition	211	215132204	9.80792e-07
		Transversion	441	215132204	2.0499e-06
	CA_rep1	Transition	231	215020830	1.07431e-06
		Transversion	335	215020830	1.55799e-06
	CA_rep2	Transition	217	214654086	1.01093e-06
		Transversion	334	214654086	1.55599e-06
	CA_rep3	Transition	179	214681109	8.33795e-07
		Transversion	245	214681109	1.14123e-06
‘Beni hoppe’ individuals	HY_00	Transition	3128	774079838	4.04093e-06
		Transversion	1625	774079838	2.09927e-06
	HY_01	Transition	2920	768778082	3.79824e-06
		Transversion	1531	768778082	1.99147e-06
	HY_02	Transition	3036	768681594	3.94962e-06
		Transversion	1539	768681594	2.00213e-06
	HY_03	Transition	3105	768495321	4.04036e-06
		Transversion	1658	768495321	2.15746e-06
	HY_04	Transition	2871	768762555	3.73457e-06
		Transversion	1527	768762555	1.98631e-06
	HY_05	Transition	3057	768715626	3.97676e-06
		Transversion	1565	768715626	2.03586e-06
	HY_06	Transition	2752	767512316	3.58561e-06
		Transversion	1502	767512316	1.95697e-06
	HY_07	Transition	2989	768465146	3.88957e-06
		Transversion	1613	768465146	2.09899e-06
	HY_08	Transition	2503	767461932	3.2614e-06
		Transversion	1368	767461932	1.7825e-06
	HY_09	Transition	2813	768241697	3.66161e-06
		Transversion	1468	768241697	1.91086e-06
	HY_10	Transition	2714	768207366	3.5329e-06
		Transversion	1479	768207366	1.92526e-06
	HY_11	Transition	2879	767718095	3.75007e-06
		Transversion	1464	767718095	1.90695e-06

## Sheet: Sheet3
Mutation frequency (number of mutations divided by the total length of each region type) of SNVs in different genomic regions.
Sample types	Sample ID	Region	Number of mutation site	Length of the region	Mutation frequency (Mutation/length)	Covered bases	Mutation frequency (Mutation/covered bases)
Regenerated woodland strawberry plants	LS_rep1	CDS	3	39263660	7.64065e-08	215334078	1.39318e-08
		5’UTR	0	4873416	0	215334078	0
		3’UTR	0	8464748	0	215334078	0
		Promote	3	60813992	4.93308e-08	215334078	1.39318e-08
		Downstream	4	60133260	6.65189e-08	215334078	1.85758e-08
		Intron	0	47339339	0	215334078	0
		Intergenic	13	55316006	2.35013e-07	215334078	6.03713e-08
		Repeat	12	69669958	1.72241e-07	215334078	5.57274e-08
	LS_rep2	CDS	18	39263660	4.58439e-07	204231154	8.81354e-08
		5’UTR	5	4873416	1.02597e-06	204231154	2.44821e-08
		3’UTR	2	8464748	2.36274e-07	204231154	9.7928e-09
		Promote	24	60813992	3.94646e-07	204231154	1.17514e-07
		Downstream	24	60133260	3.99114e-07	204231154	1.17514e-07
		Intron	19	47339339	4.01358e-07	204231154	9.30318e-08
		Intergenic	33	55316006	5.96572e-07	204231154	1.61582e-07
		Repeat	41	69669958	5.88489e-07	204231154	2.00753e-07
	LS_rep3	CDS	3	39263660	7.64065e-08	214898308	1.39601e-08
		5’UTR	0	4873416	0	214898308	0
		3’UTR	0	8464748	0	214898308	0
		Promote	2	60813992	3.28872e-08	214898308	9.3067e-09
		Downstream	7	60133260	1.16408e-07	214898308	3.25735e-08
		Intron	6	47339339	1.26745e-07	214898308	2.79202e-08
		Intergenic	14	55316006	2.53091e-07	214898308	6.51471e-08
		Repeat	14	69669958	2.00947e-07	214898308	6.51471e-08
	LS_rep4	CDS	2	39263660	5.09377e-08	214891000	9.307e-09
		5’UTR	1	4873416	2.05195e-07	214891000	4.6535e-09
		3’UTR	0	8464748	0	214891000	0
		Promote	3	60813992	4.93308e-08	214891000	1.39606e-08
		Downstream	4	60133260	6.65189e-08	214891000	1.86141e-08
		Intron	4	47339339	8.44963e-08	214891000	1.86141e-08
		Intergenic	5	55316006	9.03898e-08	214891000	2.32676e-08
		Repeat	10	69669958	1.43534e-07	214891000	4.65352e-08
	LS_rep5	CDS	6	39263660	1.52813e-07	215320011	2.78655e-08
		5’UTR	0	4873416	0	215320011	0
		3’UTR	1	8464748	1.18137e-07	215320011	4.6443e-09
		Promote	9	60813992	1.47992e-07	215320011	4.17983e-08
		Downstream	8	60133260	1.33038e-07	215320011	3.7154e-08
		Intron	5	47339339	1.0562e-07	215320011	2.32213e-08
		Intergenic	13	55316006	2.35013e-07	215320011	6.03753e-08
		Repeat	23	69669958	3.30128e-07	215320011	1.06818e-07
	LS_rep6	CDS	7	39263660	1.78282e-07	215281784	3.25155e-08
		5’UTR	0	4873416	0	215281784	0
		3’UTR	0	8464748	0	215281784	0
		Promote	8	60813992	1.31549e-07	215281784	3.71606e-08
		Downstream	5	60133260	8.31487e-08	215281784	2.32254e-08
		Intron	0	47339339	0	215281784	0
		Intergenic	9	55316006	1.62702e-07	215281784	4.18057e-08
		Repeat	14	69669958	2.00947e-07	215281784	6.5031e-08
	HS_rep1	CDS	3	39263660	7.64065e-08	214651392	1.39761e-08
		5’UTR	0	4873416	0	214651392	0
		3’UTR	1	8464748	1.18137e-07	214651392	4.6587e-09
		Promote	3	60813992	4.93308e-08	214651392	1.39761e-08
		Downstream	4	60133260	6.65189e-08	214651392	1.86349e-08
		Intron	4	47339339	8.44963e-08	214651392	1.86349e-08
		Intergenic	14	55316006	2.53091e-07	214651392	6.5222e-08
		Repeat	14	69669958	2.00947e-07	214651392	6.5222e-08
	HS_rep2	CDS	5	39263660	1.27344e-07	215174876	2.32369e-08
		5’UTR	0	4873416	0	215174876	0
		3’UTR	0	8464748	0	215174876	0
		Promote	11	60813992	1.80879e-07	215174876	5.11212e-08
		Downstream	9	60133260	1.49668e-07	215174876	4.18264e-08
		Intron	4	47339339	8.44963e-08	215174876	1.85895e-08
		Intergenic	12	55316006	2.16935e-07	215174876	5.57686e-08
		Repeat	15	69669958	2.15301e-07	215174876	6.97107e-08
	HS_rep3	CDS	3	39263660	7.64065e-08	215219319	1.39393e-08
		5’UTR	0	4873416	0	215219319	0
		3’UTR	2	8464748	2.36274e-07	215219319	9.2928e-09
		Promote	10	60813992	1.64436e-07	215219319	4.64642e-08
		Downstream	6	60133260	9.97784e-08	215219319	2.78785e-08
		Intron	7	47339339	1.47869e-07	215219319	3.2525e-08
		Intergenic	9	55316006	1.62702e-07	215219319	4.18178e-08
		Repeat	11	69669958	1.57887e-07	215219319	5.11107e-08
	HS_rep4	CDS	1	39263660	2.54688e-08	214767106	4.6562e-09
		5’UTR	0	4873416	0	214767106	0
		3’UTR	0	8464748	0	214767106	0
		Promote	0	60813992	0	214767106	0
		Downstream	3	60133260	4.98892e-08	214767106	1.39686e-08
		Intron	0	47339339	0	214767106	0
		Intergenic	4	55316006	7.23118e-08	214767106	1.86248e-08
		Repeat	5	69669958	7.17669e-08	214767106	2.3281e-08
	HS_rep5	CDS	16	39263660	4.07502e-07	215189268	7.43532e-08
		5’UTR	1	4873416	2.05195e-07	215189268	4.6471e-09
		3’UTR	2	8464748	2.36274e-07	215189268	9.2941e-09
		Promote	27	60813992	4.43977e-07	215189268	1.25471e-07
		Downstream	26	60133260	4.32373e-07	215189268	1.20824e-07
		Intron	21	47339339	4.43606e-07	215189268	9.75885e-08
		Intergenic	44	55316006	7.9543e-07	215189268	2.04471e-07
		Repeat	52	69669958	7.46376e-07	215189268	2.41648e-07
	HS_rep6	CDS	1	39263660	2.54688e-08	215018567	4.6508e-09
		5’UTR	0	4873416	0	215018567	0
		3’UTR	0	8464748	0	215018567	0
		Promote	2	60813992	3.28872e-08	215018567	9.3015e-09
		Downstream	3	60133260	4.98892e-08	215018567	1.39523e-08
		Intron	1	47339339	2.11241e-08	215018567	4.6508e-09
		Intergenic	10	55316006	1.80779e-07	215018567	4.65076e-08
		Repeat	13	69669958	1.86594e-07	215018567	6.04599e-08
	LL_rep1	CDS	57	39263660	1.45172e-06	215094212	2.65e-07
		5’UTR	6	4873416	1.23117e-06	215094212	2.78948e-08
		3’UTR	7	8464748	8.26959e-07	215094212	3.25439e-08
		Promote	70	60813992	1.15105e-06	215094212	3.25439e-07
		Downstream	79	60133260	1.31375e-06	215094212	3.67281e-07
		Intron	50	47339339	1.0562e-06	215094212	2.32456e-07
		Intergenic	90	55316006	1.62702e-06	215094212	4.18421e-07
		Repeat	118	69669958	1.6937e-06	215094212	5.48597e-07
	LL_rep2	CDS	27	39263660	6.87659e-07	215033105	1.25562e-07
		5’UTR	5	4873416	1.02597e-06	215033105	2.32522e-08
		3’UTR	6	8464748	7.08822e-07	215033105	2.79027e-08
		Promote	40	60813992	6.57743e-07	215033105	1.86018e-07
		Downstream	42	60133260	6.98449e-07	215033105	1.95319e-07
		Intron	29	47339339	6.12598e-07	215033105	1.34863e-07
		Intergenic	51	55316006	9.21975e-07	215033105	2.37173e-07
		Repeat	86	69669958	1.23439e-06	215033105	3.99938e-07
	LL_rep3	CDS	34	39263660	8.65941e-07	215033660	1.58115e-07
		5’UTR	5	4873416	1.02597e-06	215033660	2.32522e-08
		3’UTR	6	8464748	7.08822e-07	215033660	2.79026e-08
		Promote	61	60813992	1.00306e-06	215033660	2.83677e-07
		Downstream	53	60133260	8.81376e-07	215033660	2.46473e-07
		Intron	27	47339339	5.7035e-07	215033660	1.25562e-07
		Intergenic	47	55316006	8.49664e-07	215033660	2.1857e-07
		Repeat	74	69669958	1.06215e-06	215033660	3.44132e-07
	LL_rep4	CDS	27	39263660	6.87659e-07	215544830	1.25264e-07
		5’UTR	3	4873416	6.15585e-07	215544830	1.39182e-08
		3’UTR	6	8464748	7.08822e-07	215544830	2.78364e-08
		Promote	47	60813992	7.72849e-07	215544830	2.18052e-07
		Downstream	38	60133260	6.3193e-07	215544830	1.76297e-07
		Intron	30	47339339	6.33722e-07	215544830	1.39182e-07
		Intergenic	55	55316006	9.94287e-07	215544830	2.55167e-07
		Repeat	70	69669958	1.00474e-06	215544830	3.24758e-07
	LL_rep5	CDS	82	39263660	2.08845e-06	215500155	3.8051e-07
		5’UTR	6	4873416	1.23117e-06	215500155	2.78422e-08
		3’UTR	15	8464748	1.77206e-06	215500155	6.96055e-08
		Promote	124	60813992	2.039e-06	215500155	5.75406e-07
		Downstream	104	60133260	1.72949e-06	215500155	4.82598e-07
		Intron	114	47339339	2.40815e-06	215500155	5.29002e-07
		Intergenic	132	55316006	2.38629e-06	215500155	6.12529e-07
		Repeat	175	69669958	2.51184e-06	215500155	8.12064e-07
	LL_rep6	CDS	23	39263660	5.85783e-07	215383014	1.06787e-07
		5’UTR	3	4873416	6.15585e-07	215383014	1.39287e-08
		3’UTR	4	8464748	4.72548e-07	215383014	1.85716e-08
		Promote	36	60813992	5.91969e-07	215383014	1.67144e-07
		Downstream	34	60133260	5.65411e-07	215383014	1.57858e-07
		Intron	19	47339339	4.01358e-07	215383014	8.82149e-08
		Intergenic	37	55316006	6.68884e-07	215383014	1.71787e-07
		Repeat	56	69669958	8.0379e-07	215383014	2.60002e-07
	HL_rep1	CDS	54	39263660	1.37532e-06	215172138	2.50962e-07
		5’UTR	6	4873416	1.23117e-06	215172138	2.78847e-08
		3’UTR	7	8464748	8.26959e-07	215172138	3.25321e-08
		Promote	82	60813992	1.34837e-06	215172138	3.8109e-07
		Downstream	63	60133260	1.04767e-06	215172138	2.92789e-07
		Intron	69	47339339	1.45756e-06	215172138	3.20674e-07
		Intergenic	136	55316006	2.4586e-06	215172138	6.32052e-07
		Repeat	168	69669958	2.41137e-06	215172138	7.8077e-07
	HL_rep2	CDS	90	39263660	2.2922e-06	215119741	4.18372e-07
		5’UTR	6	4873416	1.23117e-06	215119741	2.78914e-08
		3’UTR	16	8464748	1.89019e-06	215119741	7.43772e-08
		Promote	175	60813992	2.87763e-06	215119741	8.135e-07
		Downstream	163	60133260	2.71065e-06	215119741	7.57718e-07
		Intron	125	47339339	2.64051e-06	215119741	5.81072e-07
		Intergenic	215	55316006	3.88676e-06	215119741	9.99443e-07
		Repeat	292	69669958	4.19119e-06	215119741	1.35738e-06
	HL_rep3	CDS	97	39263660	2.47048e-06	215118557	4.50914e-07
		5’UTR	8	4873416	1.64156e-06	215118557	3.71888e-08
		3’UTR	11	8464748	1.29951e-06	215118557	5.11346e-08
		Promote	134	60813992	2.20344e-06	215118557	6.22912e-07
		Downstream	136	60133260	2.26164e-06	215118557	6.3221e-07
		Intron	78	47339339	1.64768e-06	215118557	3.62591e-07
		Intergenic	176	55316006	3.18172e-06	215118557	8.18154e-07
		Repeat	226	69669958	3.24387e-06	215118557	1.05058e-06
	HL_rep4	CDS	62	39263660	1.57907e-06	214954005	2.88434e-07
		5’UTR	10	4873416	2.05195e-06	214954005	4.65216e-08
		3’UTR	12	8464748	1.41764e-06	214954005	5.58259e-08
		Promote	103	60813992	1.69369e-06	214954005	4.79172e-07
		Downstream	93	60133260	1.54657e-06	214954005	4.32651e-07
		Intron	69	47339339	1.45756e-06	214954005	3.20999e-07
		Intergenic	122	55316006	2.20551e-06	214954005	5.67563e-07
		Repeat	156	69669958	2.23913e-06	214954005	7.25737e-07
	HL_rep5	CDS	83	39263660	2.11391e-06	215350577	3.85418e-07
		5’UTR	8	4873416	1.64156e-06	215350577	3.71487e-08
		3’UTR	12	8464748	1.41764e-06	215350577	5.57231e-08
		Promote	128	60813992	2.10478e-06	215350577	5.9438e-07
		Downstream	129	60133260	2.14524e-06	215350577	5.99023e-07
		Intron	96	47339339	2.02791e-06	215350577	4.45785e-07
		Intergenic	168	55316006	3.0371e-06	215350577	7.80123e-07
		Repeat	198	69669958	2.84197e-06	215350577	9.19431e-07
	HL_rep6	CDS	98	39263660	2.49595e-06	215132204	4.55534e-07
		5’UTR	10	4873416	2.05195e-06	215132204	4.6483e-08
		3’UTR	16	8464748	1.89019e-06	215132204	7.43729e-08
		Promote	154	60813992	2.53231e-06	215132204	7.15839e-07
		Downstream	157	60133260	2.61087e-06	215132204	7.29784e-07
		Intron	138	47339339	2.91512e-06	215132204	6.41466e-07
		Intergenic	193	55316006	3.48904e-06	215132204	8.97123e-07
		Repeat	278	69669958	3.99024e-06	215132204	1.29223e-06
	CA_rep1	CDS	83	39263660	2.11391e-06	215020830	3.86009e-07
		5’UTR	10	4873416	2.05195e-06	215020830	4.65071e-08
		3’UTR	19	8464748	2.2446e-06	215020830	8.83635e-08
		Promote	153	60813992	2.51587e-06	215020830	7.11559e-07
		Downstream	124	60133260	2.06209e-06	215020830	5.76688e-07
		Intron	87	47339339	1.8378e-06	215020830	4.04612e-07
		Intergenic	205	55316006	3.70598e-06	215020830	9.53396e-07
		Repeat	231	69669958	3.31563e-06	215020830	1.07431e-06
	CA_rep2	CDS	87	39263660	2.21579e-06	214654086	4.05303e-07
		5’UTR	12	4873416	2.46234e-06	214654086	5.59039e-08
		3’UTR	19	8464748	2.2446e-06	214654086	8.85145e-08
		Promote	150	60813992	2.46654e-06	214654086	6.98799e-07
		Downstream	143	60133260	2.37805e-06	214654086	6.66188e-07
		Intron	103	47339339	2.17578e-06	214654086	4.79842e-07
		Intergenic	155	55316006	2.80208e-06	214654086	7.22092e-07
		Repeat	221	69669958	3.1721e-06	214654086	1.02956e-06
	CA_rep3	CDS	51	39263660	1.29891e-06	214681109	2.37562e-07
		5’UTR	14	4873416	2.87273e-06	214681109	6.5213e-08
		3’UTR	17	8464748	2.00833e-06	214681109	7.91872e-08
		Promote	112	60813992	1.84168e-06	214681109	5.21704e-07
		Downstream	103	60133260	1.71286e-06	214681109	4.79781e-07
		Intron	82	47339339	1.73217e-06	214681109	3.81962e-07
		Intergenic	134	55316006	2.42245e-06	214681109	6.24182e-07
		Repeat	186	69669958	2.66973e-06	214681109	8.66401e-07
‘Beni hoppe’ individuals	HY_00	CDS	434	126330259	3.43544e-06	774079838	5.60666e-07
		5’UTR	61	13194036	4.6233e-06	774079838	7.88032e-08
		3’UTR	130	22328318	5.8222e-06	774079838	1.67941e-07
		Promote	1256	204293958	6.148e-06	774079838	1.62257e-06
		Downstream	1154	201473039	5.72781e-06	774079838	1.4908e-06
		Intron	826	151637153	5.44721e-06	774079838	1.06707e-06
		Intergenic	1690	236043697	7.15969e-06	774079838	2.18324e-06
		Repeat	2490	377096008	6.60309e-06	774079838	3.21672e-06
	HY_01	CDS	507	126330259	4.01329e-06	768778082	6.59488e-07
		5’UTR	70	13194036	5.30543e-06	768778082	9.10536e-08
		3’UTR	126	22328318	5.64306e-06	768778082	1.63896e-07
		Promote	1173	204293958	5.74173e-06	768778082	1.5258e-06
		Downstream	1083	201473039	5.37541e-06	768778082	1.40873e-06
		Intron	806	151637153	5.31532e-06	768778082	1.04842e-06
		Intergenic	1472	236043697	6.23613e-06	768778082	1.91473e-06
		Repeat	2257	377096008	5.98521e-06	768778082	2.93583e-06
	HY_02	CDS	510	126330259	4.03704e-06	768681594	6.63474e-07
		5’UTR	72	13194036	5.45701e-06	768681594	9.36669e-08
		3’UTR	124	22328318	5.55349e-06	768681594	1.61315e-07
		Promote	1238	204293958	6.0599e-06	768681594	1.61055e-06
		Downstream	1141	201473039	5.66329e-06	768681594	1.48436e-06
		Intron	827	151637153	5.45381e-06	768681594	1.07587e-06
		Intergenic	1494	236043697	6.32934e-06	768681594	1.94359e-06
		Repeat	2296	377096008	6.08864e-06	768681594	2.98693e-06
	HY_03	CDS	554	126330259	4.38533e-06	768495321	7.20889e-07
		5’UTR	59	13194036	4.47172e-06	768495321	7.67734e-08
		3’UTR	119	22328318	5.32956e-06	768495321	1.54848e-07
		Promote	1272	204293958	6.22632e-06	768495321	1.65518e-06
		Downstream	1191	201473039	5.91146e-06	768495321	1.54978e-06
		Intron	871	151637153	5.74397e-06	768495321	1.13338e-06
		Intergenic	1556	236043697	6.592e-06	768495321	2.02474e-06
		Repeat	2360	377096008	6.25835e-06	768495321	3.07094e-06
	HY_04	CDS	484	126330259	3.83123e-06	768762555	6.29583e-07
		5’UTR	51	13194036	3.86538e-06	768762555	6.63404e-08
		3’UTR	118	22328318	5.28477e-06	768762555	1.53493e-07
		Promote	1225	204293958	5.99626e-06	768762555	1.59347e-06
		Downstream	1101	201473039	5.46475e-06	768762555	1.43217e-06
		Intron	799	151637153	5.26916e-06	768762555	1.03933e-06
		Intergenic	1449	236043697	6.13869e-06	768762555	1.88485e-06
		Repeat	2213	377096008	5.86853e-06	768762555	2.87865e-06
	HY_05	CDS	503	126330259	3.98163e-06	768715626	6.54338e-07
		5’UTR	62	13194036	4.69909e-06	768715626	8.0654e-08
		3’UTR	134	22328318	6.00135e-06	768715626	1.74317e-07
		Promote	1267	204293958	6.20185e-06	768715626	1.6482e-06
		Downstream	1217	201473039	6.04051e-06	768715626	1.58316e-06
		Intron	806	151637153	5.31532e-06	768715626	1.0485e-06
		Intergenic	1509	236043697	6.39288e-06	768715626	1.96301e-06
		Repeat	2330	377096008	6.1788e-06	768715626	3.03103e-06
	HY_06	CDS	468	126330259	3.70458e-06	767512316	6.09762e-07
		5’UTR	49	13194036	3.7138e-06	767512316	6.38426e-08
		3’UTR	112	22328318	5.01605e-06	767512316	1.45926e-07
		Promote	1157	204293958	5.66341e-06	767512316	1.50747e-06
		Downstream	1060	201473039	5.26125e-06	767512316	1.38109e-06
		Intron	707	151637153	4.66245e-06	767512316	9.21158e-07
		Intergenic	1421	236043697	6.02007e-06	767512316	1.85144e-06
		Repeat	2179	377096008	5.77837e-06	767512316	2.83904e-06
	HY_07	CDS	536	126330259	4.24285e-06	768465146	6.97494e-07
		5’UTR	74	13194036	5.60859e-06	768465146	9.62958e-08
		3’UTR	135	22328318	6.04613e-06	768465146	1.75675e-07
		Promote	1255	204293958	6.14311e-06	768465146	1.63313e-06
		Downstream	1180	201473039	5.85686e-06	768465146	1.53553e-06
		Intron	793	151637153	5.22959e-06	768465146	1.03193e-06
		Intergenic	1524	236043697	6.45643e-06	768465146	1.98317e-06
		Repeat	2298	377096008	6.09394e-06	768465146	2.99038e-06
	HY_08	CDS	459	126330259	3.63333e-06	767461932	5.98075e-07
		5’UTR	57	13194036	4.32013e-06	767461932	7.42708e-08
		3’UTR	103	22328318	4.61298e-06	767461932	1.34209e-07
		Promote	1004	204293958	4.91449e-06	767461932	1.30821e-06
		Downstream	956	201473039	4.74505e-06	767461932	1.24566e-06
		Intron	741	151637153	4.88667e-06	767461932	9.6552e-07
		Intergenic	1302	236043697	5.51593e-06	767461932	1.6965e-06
		Repeat	1924	377096008	5.10215e-06	767461932	2.50696e-06
	HY_09	CDS	491	126330259	3.88664e-06	768241697	6.39122e-07
		5’UTR	63	13194036	4.77488e-06	768241697	8.20054e-08
		3’UTR	113	22328318	5.06084e-06	768241697	1.47089e-07
		Promote	1128	204293958	5.52146e-06	768241697	1.46829e-06
		Downstream	1112	201473039	5.51935e-06	768241697	1.44746e-06
		Intron	788	151637153	5.19662e-06	768241697	1.02572e-06
		Intergenic	1407	236043697	5.96076e-06	768241697	1.83145e-06
		Repeat	2160	377096008	5.72798e-06	768241697	2.81162e-06
	HY_10	CDS	468	126330259	3.70458e-06	768207366	6.09211e-07
		5’UTR	67	13194036	5.07805e-06	768207366	8.7216e-08
		3’UTR	122	22328318	5.46391e-06	768207366	1.58811e-07
		Promote	1120	204293958	5.4823e-06	768207366	1.45794e-06
		Downstream	1071	201473039	5.31585e-06	768207366	1.39415e-06
		Intron	778	151637153	5.13067e-06	768207366	1.01275e-06
		Intergenic	1348	236043697	5.71081e-06	768207366	1.75473e-06
		Repeat	2054	377096008	5.44689e-06	768207366	2.67376e-06
	HY_11	CDS	516	126330259	4.08453e-06	767718095	6.72122e-07
		5’UTR	56	13194036	4.24434e-06	767718095	7.29434e-08
		3’UTR	121	22328318	5.41913e-06	767718095	1.5761e-07
		Promote	1171	204293958	5.73194e-06	767718095	1.5253e-06
		Downstream	1122	201473039	5.56898e-06	767718095	1.46147e-06
		Intron	824	151637153	5.43402e-06	767718095	1.07331e-06
		Intergenic	1381	236043697	5.85061e-06	767718095	1.79884e-06
		Repeat	2166	377096008	5.7439e-06	767718095	2.82135e-06

## Sheet: Sheet4
Mutation frequency (number of mutations divided by the total length of each region type) of indels in different genomic regions
Sample ID	Region	Number of mutation site	Length of the region	Mutation frequency (Mutation/length)	Covered bases	Mutation frequency (Mutation/covered bases)
HY_00	CDS	45	126330259	3.56209e-07	774079838	5.81335e-08
	5UTR	24	13194036	1.819e-06	774079838	3.10046e-08
	3UTR	55	22328318	2.46324e-06	774079838	7.10521e-08
	Promote	428	204293958	2.09502e-06	774079838	5.52915e-07
	Downstream	371	201473039	1.84144e-06	774079838	4.79279e-07
	Intron	233	151637153	1.53656e-06	774079838	3.01003e-07
	Intergenic	340	236043697	1.44041e-06	774079838	4.39231e-07
	Repeat	447	377096008	1.18537e-06	774079838	5.7746e-07
HY_01	CDS	43	126330259	3.40378e-07	768778082	5.59329e-08
	5UTR	18	13194036	1.36425e-06	768778082	2.34138e-08
	3UTR	48	22328318	2.14974e-06	768778082	6.24367e-08
	Promote	306	204293958	1.49784e-06	768778082	3.98034e-07
	Downstream	275	201473039	1.36495e-06	768778082	3.57711e-07
	Intron	192	151637153	1.26618e-06	768778082	2.49747e-07
	Intergenic	246	236043697	1.04218e-06	768778082	3.19988e-07
	Repeat	304	377096008	8.06161e-07	768778082	3.95433e-07
HY_02	CDS	43	126330259	3.40378e-07	768681594	5.59399e-08
	5UTR	26	13194036	1.97059e-06	768681594	3.38241e-08
	3UTR	43	22328318	1.92581e-06	768681594	5.59399e-08
	Promote	341	204293958	1.66916e-06	768681594	4.43617e-07
	Downstream	281	201473039	1.39473e-06	768681594	3.65561e-07
	Intron	215	151637153	1.41786e-06	768681594	2.797e-07
	Intergenic	291	236043697	1.23282e-06	768681594	3.7857e-07
	Repeat	348	377096008	9.22842e-07	768681594	4.52723e-07
HY_03	CDS	55	126330259	4.35367e-07	768495321	7.15684e-08
	5UTR	18	13194036	1.36425e-06	768495321	2.34224e-08
	3UTR	38	22328318	1.70187e-06	768495321	4.94473e-08
	Promote	334	204293958	1.6349e-06	768495321	4.34616e-07
	Downstream	327	201473039	1.62305e-06	768495321	4.25507e-07
	Intron	198	151637153	1.30575e-06	768495321	2.57646e-07
	Intergenic	261	236043697	1.10573e-06	768495321	3.39625e-07
	Repeat	331	377096008	8.77761e-07	768495321	4.30712e-07
HY_04	CDS	45	126330259	3.56209e-07	768762555	5.85356e-08
	5UTR	15	13194036	1.13688e-06	768762555	1.95119e-08
	3UTR	44	22328318	1.97059e-06	768762555	5.72348e-08
	Promote	350	204293958	1.71322e-06	768762555	4.55277e-07
	Downstream	299	201473039	1.48407e-06	768762555	3.88937e-07
	Intron	216	151637153	1.42445e-06	768762555	2.80971e-07
	Intergenic	229	236043697	9.70159e-07	768762555	2.97881e-07
	Repeat	327	377096008	8.67153e-07	768762555	4.25359e-07
HY_05	CDS	45	126330259	3.56209e-07	768715626	5.85392e-08
	5UTR	21	13194036	1.59163e-06	768715626	2.73183e-08
	3UTR	40	22328318	1.79145e-06	768715626	5.20348e-08
	Promote	338	204293958	1.65448e-06	768715626	4.39694e-07
	Downstream	295	201473039	1.46422e-06	768715626	3.83757e-07
	Intron	203	151637153	1.33872e-06	768715626	2.64077e-07
	Intergenic	265	236043697	1.12267e-06	768715626	3.44731e-07
	Repeat	343	377096008	9.09583e-07	768715626	4.46199e-07
HY_06	CDS	48	126330259	3.79956e-07	767512316	6.25397e-08
	5UTR	18	13194036	1.36425e-06	767512316	2.34524e-08
	3UTR	42	22328318	1.88102e-06	767512316	5.47222e-08
	Promote	285	204293958	1.39505e-06	767512316	3.7133e-07
	Downstream	255	201473039	1.26568e-06	767512316	3.32242e-07
	Intron	172	151637153	1.13429e-06	767512316	2.24101e-07
	Intergenic	236	236043697	9.99815e-07	767512316	3.07487e-07
	Repeat	297	377096008	7.87598e-07	767512316	3.86964e-07
HY_07	CDS	51	126330259	4.03704e-07	768465146	6.63661e-08
	5UTR	24	13194036	1.819e-06	768465146	3.12311e-08
	3UTR	43	22328318	1.92581e-06	768465146	5.59557e-08
	Promote	312	204293958	1.52721e-06	768465146	4.06004e-07
	Downstream	289	201473039	1.43444e-06	768465146	3.76074e-07
	Intron	198	151637153	1.30575e-06	768465146	2.57656e-07
	Intergenic	259	236043697	1.09725e-06	768465146	3.37035e-07
	Repeat	306	377096008	8.11464e-07	768465146	3.98196e-07
HY_08	CDS	42	126330259	3.32462e-07	767461932	5.47258e-08
	5UTR	22	13194036	1.66742e-06	767461932	2.86659e-08
	3UTR	40	22328318	1.79145e-06	767461932	5.21198e-08
	Promote	271	204293958	1.32652e-06	767461932	3.53112e-07
	Downstream	250	201473039	1.24086e-06	767461932	3.25749e-07
	Intron	177	151637153	1.16726e-06	767461932	2.3063e-07
	Intergenic	227	236043697	9.61686e-07	767461932	2.9578e-07
	Repeat	259	377096008	6.86828e-07	767461932	3.37476e-07
HY_09	CDS	52	126330259	4.1162e-07	768241697	6.7687e-08
	5UTR	20	13194036	1.51584e-06	768241697	2.60335e-08
	3UTR	45	22328318	2.01538e-06	768241697	5.85753e-08
	Promote	315	204293958	1.5419e-06	768241697	4.10027e-07
	Downstream	268	201473039	1.3302e-06	768241697	3.48849e-07
	Intron	193	151637153	1.27278e-06	768241697	2.51223e-07
	Intergenic	221	236043697	9.36267e-07	768241697	2.8767e-07
	Repeat	277	377096008	7.34561e-07	768241697	3.60564e-07
HY_10	CDS	45	126330259	3.56209e-07	768207366	5.85779e-08
	5UTR	14	13194036	1.06109e-06	768207366	1.82242e-08
	3UTR	41	22328318	1.83623e-06	768207366	5.3371e-08
	Promote	283	204293958	1.38526e-06	768207366	3.6839e-07
	Downstream	234	201473039	1.16145e-06	768207366	3.04605e-07
	Intron	189	151637153	1.2464e-06	768207366	2.46027e-07
	Intergenic	216	236043697	9.15085e-07	768207366	2.81174e-07
	Repeat	254	377096008	6.73569e-07	768207366	3.3064e-07
HY_11	CDS	46	126330259	3.64125e-07	767718095	5.99178e-08
	5UTR	21	13194036	1.59163e-06	767718095	2.73538e-08
	3UTR	43	22328318	1.92581e-06	767718095	5.60101e-08
	Promote	298	204293958	1.45868e-06	767718095	3.88163e-07
	Downstream	273	201473039	1.35502e-06	767718095	3.55599e-07
	Intron	174	151637153	1.14748e-06	767718095	2.26646e-07
	Intergenic	213	236043697	9.02375e-07	767718095	2.77446e-07
	Repeat	274	377096008	7.26605e-07	767718095	3.56902e-07

## Sheet: Sheet5
Mutation frequency (number of mutations divided by the total length of each region type) of SNVs in different transposon families.
Sample types	Sample ID	Region	Number of mutation site	Length of the region	Mutation frequency (Mutation/length)	Covered bases	Mutation frequency (Mutation/covered bases)
Regenerated woodland strawberry plants	LS_rep1	DNA	4	20562947	1.94525e-07	215334078	1.85758e-08
		LINE	0	3358803	0	215334078	0
		LTR	9	42691929	2.10813e-07	215334078	4.17955e-08
		Other	0	767497	0	215334078	0
		PLE	0	14225	0	215334078	0
		SINE	0	34597	0	215334078	0
		TRF	0	3717276	0	215334078	0
	LS_rep2	DNA	8	20562947	3.89049e-07	204231154	3.91713e-08
		LINE	0	3358803	0	204231154	0
		LTR	33	42691929	7.7298e-07	204231154	1.61582e-07
		Other	0	767497	0	204231154	0
		PLE	0	14225	0	204231154	0
		SINE	0	34597	0	204231154	0
		TRF	1	3717276	2.69014e-07	204231154	4.8964e-09
	LS_rep3	DNA	4	20562947	1.94525e-07	214898308	1.86135e-08
		LINE	0	3358803	0	214898308	0
		LTR	11	42691929	2.5766e-07	214898308	5.1187e-08
		Other	0	767497	0	214898308	0
		PLE	0	14225	0	214898308	0
		SINE	0	34597	0	214898308	0
		TRF	1	3717276	2.69014e-07	214898308	4.6534e-09
	LS_rep4	DNA	2	20562947	9.72623e-08	214891000	9.307e-09
		LINE	0	3358803	0	214891000	0
		LTR	8	42691929	1.87389e-07	214891000	3.72282e-08
		Other	0	767497	0	214891000	0
		PLE	0	14225	0	214891000	0
		SINE	0	34597	0	214891000	0
		TRF	0	3717276	0	214891000	0
	LS_rep5	DNA	5	20562947	2.43156e-07	215320011	2.32213e-08
		LINE	0	3358803	0	215320011	0
		LTR	19	42691929	4.45049e-07	215320011	8.82408e-08
		Other	0	767497	0	215320011	0
		PLE	0	14225	0	215320011	0
		SINE	0	34597	0	215320011	0
		TRF	0	3717276	0	215320011	0
	LS_rep6	DNA	3	20562947	1.45894e-07	215281784	1.39352e-08
		LINE	0	3358803	0	215281784	0
		LTR	10	42691929	2.34236e-07	215281784	4.64507e-08
		Other	0	767497	0	215281784	0
		PLE	0	14225	0	215281784	0
		SINE	0	34597	0	215281784	0
		TRF	2	3717276	5.38028e-07	215281784	9.2901e-09
	HS_rep1	DNA	3	20562947	1.45894e-07	214651392	1.39761e-08
		LINE	0	3358803	0	214651392	0
		LTR	13	42691929	3.04507e-07	214651392	6.05633e-08
		Other	0	767497	0	214651392	0
		PLE	0	14225	0	214651392	0
		SINE	0	34597	0	214651392	0
		TRF	0	3717276	0	214651392	0
	HS_rep2	DNA	4	20562947	1.94525e-07	215174876	1.85895e-08
		LINE	0	3358803	0	215174876	0
		LTR	11	42691929	2.5766e-07	215174876	5.11212e-08
		Other	0	767497	0	215174876	0
		PLE	0	14225	0	215174876	0
		SINE	0	34597	0	215174876	0
		TRF	0	3717276	0	215174876	0
	HS_rep3	DNA	2	20562947	9.72623e-08	215219319	9.2928e-09
		LINE	0	3358803	0	215219319	0
		LTR	9	42691929	2.10813e-07	215219319	4.18178e-08
		Other	0	767497	0	215219319	0
		PLE	0	14225	0	215219319	0
		SINE	0	34597	0	215219319	0
		TRF	0	3717276	0	215219319	0
	HS_rep4	DNA	1	20562947	4.86312e-08	214767106	4.6562e-09
		LINE	0	3358803	0	214767106	0
		LTR	3	42691929	7.02709e-08	214767106	1.39686e-08
		Other	0	767497	0	214767106	0
		PLE	0	14225	0	214767106	0
		SINE	0	34597	0	214767106	0
		TRF	1	3717276	2.69014e-07	214767106	4.6562e-09
	HS_rep5	DNA	15	20562947	7.29467e-07	215189268	6.97061e-08
		LINE	1	3358803	2.97725e-07	215189268	4.6471e-09
		LTR	36	42691929	8.43251e-07	215189268	1.67295e-07
		Other	0	767497	0	215189268	0
		PLE	0	14225	0	215189268	0
		SINE	0	34597	0	215189268	0
		TRF	3	3717276	8.07043e-07	215189268	1.39412e-08
	HS_rep6	DNA	1	20562947	4.86312e-08	215018567	4.6508e-09
		LINE	1	3358803	2.97725e-07	215018567	4.6508e-09
		LTR	10	42691929	2.34236e-07	215018567	4.65076e-08
		Other	0	767497	0	215018567	0
		PLE	0	14225	0	215018567	0
		SINE	0	34597	0	215018567	0
		TRF	1	3717276	2.69014e-07	215018567	4.6508e-09
	LL_rep1	DNA	37	20562947	1.79935e-06	215094212	1.72018e-07
		LINE	3	3358803	8.93175e-07	215094212	1.39474e-08
		LTR	75	42691929	1.75677e-06	215094212	3.48684e-07
		Other	0	767497	0	215094212	0
		PLE	0	14225	0	215094212	0
		SINE	0	34597	0	215094212	0
		TRF	5	3717276	1.34507e-06	215094212	2.32456e-08
	LL_rep2	DNA	28	20562947	1.36167e-06	215033105	1.30212e-07
		LINE	5	3358803	1.48863e-06	215033105	2.32522e-08
		LTR	49	42691929	1.14776e-06	215033105	2.27872e-07
		Other	2	767497	2.60587e-06	215033105	9.3009e-09
		PLE	0	14225	0	215033105	0
		SINE	0	34597	0	215033105	0
		TRF	3	3717276	8.07043e-07	215033105	1.39513e-08
	LL_rep3	DNA	25	20562947	1.21578e-06	215033660	1.16261e-07
		LINE	5	3358803	1.48863e-06	215033660	2.32522e-08
		LTR	43	42691929	1.00722e-06	215033660	1.99969e-07
		Other	0	767497	0	215033660	0
		PLE	0	14225	0	215033660	0
		SINE	0	34597	0	215033660	0
		TRF	2	3717276	5.38028e-07	215033660	9.3009e-09
	LL_rep4	DNA	17	20562947	8.2673e-07	215544830	7.88699e-08
		LINE	6	3358803	1.78635e-06	215544830	2.78364e-08
		LTR	42	42691929	9.83792e-07	215544830	1.94855e-07
		Other	1	767497	1.30294e-06	215544830	4.6394e-09
		PLE	0	14225	0	215544830	0
		SINE	1	34597	2.89042e-05	215544830	4.6394e-09
		TRF	4	3717276	1.07606e-06	215544830	1.85576e-08
	LL_rep5	DNA	60	20562947	2.91787e-06	215500155	2.78422e-07
		LINE	10	3358803	2.97725e-06	215500155	4.64037e-08
		LTR	101	42691929	2.36579e-06	215500155	4.68677e-07
		Other	0	767497	0	215500155	0
		PLE	0	14225	0	215500155	0
		SINE	0	34597	0	215500155	0
		TRF	7	3717276	1.8831e-06	215500155	3.24826e-08
	LL_rep6	DNA	21	20562947	1.02125e-06	215383014	9.75007e-08
		LINE	1	3358803	2.97725e-07	215383014	4.6429e-09
		LTR	34	42691929	7.96404e-07	215383014	1.57858e-07
		Other	1	767497	1.30294e-06	215383014	4.6429e-09
		PLE	0	14225	0	215383014	0
		SINE	0	34597	0	215383014	0
		TRF	1	3717276	2.69014e-07	215383014	4.6429e-09
	HL_rep1	DNA	41	20562947	1.99388e-06	215172138	1.90545e-07
		LINE	7	3358803	2.08408e-06	215172138	3.25321e-08
		LTR	113	42691929	2.64687e-06	215172138	5.25161e-07
		Other	1	767497	1.30294e-06	215172138	4.6474e-09
		PLE	0	14225	0	215172138	0
		SINE	0	34597	0	215172138	0
		TRF	8	3717276	2.15211e-06	215172138	3.71795e-08
	HL_rep2	DNA	84	20562947	4.08502e-06	215119741	3.9048e-07
		LINE	12	3358803	3.5727e-06	215119741	5.57829e-08
		LTR	188	42691929	4.40364e-06	215119741	8.73932e-07
		Other	5	767497	6.51468e-06	215119741	2.32429e-08
		PLE	0	14225	0	215119741	0
		SINE	0	34597	0	215119741	0
		TRF	11	3717276	2.95916e-06	215119741	5.11343e-08
	HL_rep3	DNA	62	20562947	3.01513e-06	215118557	2.88213e-07
		LINE	13	3358803	3.87043e-06	215118557	6.04318e-08
		LTR	147	42691929	3.44327e-06	215118557	6.83344e-07
		Other	1	767497	1.30294e-06	215118557	4.6486e-09
		PLE	0	14225	0	215118557	0
		SINE	0	34597	0	215118557	0
		TRF	10	3717276	2.69014e-06	215118557	4.6486e-08
	HL_rep4	DNA	53	20562947	2.57745e-06	214954005	2.46564e-07
		LINE	5	3358803	1.48863e-06	214954005	2.32608e-08
		LTR	89	42691929	2.0847e-06	214954005	4.14042e-07
		Other	1	767497	1.30294e-06	214954005	4.6522e-09
		PLE	0	14225	0	214954005	0
		SINE	0	34597	0	214954005	0
		TRF	10	3717276	2.69014e-06	214954005	4.65216e-08
	HL_rep5	DNA	64	20562947	3.11239e-06	215350577	2.9719e-07
		LINE	7	3358803	2.08408e-06	215350577	3.25051e-08
		LTR	121	42691929	2.83426e-06	215350577	5.61875e-07
		Other	4	767497	5.21175e-06	215350577	1.85744e-08
		PLE	0	14225	0	215350577	0
		SINE	1	34597	2.89042e-05	215350577	4.6436e-09
		TRF	8	3717276	2.15211e-06	215350577	3.71487e-08
	HL_rep6	DNA	76	20562947	3.69597e-06	215132204	3.53271e-07
		LINE	10	3358803	2.97725e-06	215132204	4.6483e-08
		LTR	178	42691929	4.16941e-06	215132204	8.27398e-07
		Other	3	767497	3.90881e-06	215132204	1.39449e-08
		PLE	0	14225	0	215132204	0
		SINE	0	34597	0	215132204	0
		TRF	13	3717276	3.49718e-06	215132204	6.0428e-08
	CA_rep1	DNA	68	20562947	3.30692e-06	215020830	3.16248e-07
		LINE	7	3358803	2.08408e-06	215020830	3.2555e-08
		LTR	145	42691929	3.39643e-06	215020830	6.74353e-07
		Other	2	767497	2.60587e-06	215020830	9.3014e-09
		PLE	0	14225	0	215020830	0
		SINE	0	34597	0	215020830	0
		TRF	11	3717276	2.95916e-06	215020830	5.11578e-08
	CA_rep2	DNA	54	20562947	2.62608e-06	214654086	2.51568e-07
		LINE	12	3358803	3.5727e-06	214654086	5.59039e-08
		LTR	142	42691929	3.32616e-06	214654086	6.6153e-07
		Other	2	767497	2.60587e-06	214654086	9.3173e-09
		PLE	0	14225	0	214654086	0
		SINE	0	34597	0	214654086	0
		TRF	13	3717276	3.49718e-06	214654086	6.05626e-08
	CA_rep3	DNA	57	20562947	2.77198e-06	214681109	2.6551e-07
		LINE	7	3358803	2.08408e-06	214681109	3.26065e-08
		LTR	114	42691929	2.67029e-06	214681109	5.3102e-07
		Other	2	767497	2.60587e-06	214681109	9.3161e-09
		PLE	0	14225	0	214681109	0
		SINE	0	34597	0	214681109	0
		TRF	7	3717276	1.8831e-06	214681109	3.26065e-08
‘Beni hoppe’ individuals	HY_00	DNA	655	103044167	6.3565e-06	774079838	8.46166e-07
		LINE	91	11613810	7.8355e-06	774079838	1.17559e-07
		LTR	1716	255075273	6.72743e-06	774079838	2.21683e-06
		Other	34	6352336	5.35236e-06	774079838	4.39231e-08
		PLE	1	468608	2.13398e-06	774079838	1.29186e-09
		SINE	3	904887	3.31533e-06	774079838	3.87557e-09
		TRF	23	7604968	3.02434e-06	774079838	2.97127e-08
	HY_01	DNA	557	103044167	5.40545e-06	768778082	7.24526e-07
		LINE	88	11613810	7.57719e-06	768778082	1.14467e-07
		LTR	1576	255075273	6.17857e-06	768778082	2.05001e-06
		Other	29	6352336	4.56525e-06	768778082	3.77222e-08
		PLE	1	468608	2.13398e-06	768778082	1.30077e-09
		SINE	5	904887	5.52555e-06	768778082	6.50383e-09
		TRF	27	7604968	3.55031e-06	768778082	3.51207e-08
	HY_02	DNA	583	103044167	5.65777e-06	768681594	7.58441e-07
		LINE	101	11613810	8.69654e-06	768681594	1.31394e-07
		LTR	1592	255075273	6.24129e-06	768681594	2.07108e-06
		Other	29	6352336	4.56525e-06	768681594	3.77269e-08
		PLE	2	468608	4.26796e-06	768681594	2.60186e-09
		SINE	2	904887	2.21022e-06	768681594	2.60186e-09
		TRF	14	7604968	1.8409e-06	768681594	1.8213e-08
	HY_03	DNA	589	103044167	5.716e-06	768495321	7.66433e-07
		LINE	101	11613810	8.69654e-06	768495321	1.31426e-07
		LTR	1665	255075273	6.52748e-06	768495321	2.16657e-06
		Other	28	6352336	4.40783e-06	768495321	3.64348e-08
		PLE	1	468608	2.13398e-06	768495321	1.30124e-09
		SINE	3	904887	3.31533e-06	768495321	3.90373e-09
		TRF	16	7604968	2.10389e-06	768495321	2.08199e-08
	HY_04	DNA	561	103044167	5.44427e-06	768762555	7.29744e-07
		LINE	98	11613810	8.43823e-06	768762555	1.27478e-07
		LTR	1540	255075273	6.03743e-06	768762555	2.00322e-06
		Other	20	6352336	3.14845e-06	768762555	2.60158e-08
		PLE	2	468608	4.26796e-06	768762555	2.60158e-09
		SINE	5	904887	5.52555e-06	768762555	6.50396e-09
		TRF	16	7604968	2.10389e-06	768762555	2.08127e-08
	HY_05	DNA	582	103044167	5.64806e-06	768715626	7.57107e-07
		LINE	96	11613810	8.26602e-06	768715626	1.24884e-07
		LTR	1629	255075273	6.38635e-06	768715626	2.11912e-06
		Other	25	6352336	3.93556e-06	768715626	3.25218e-08
		PLE	3	468608	6.40194e-06	768715626	3.90261e-09
		SINE	4	904887	4.42044e-06	768715626	5.20348e-09
		TRF	21	7604968	2.76135e-06	768715626	2.73183e-08
	HY_06	DNA	532	103044167	5.16283e-06	767512316	6.93148e-07
		LINE	86	11613810	7.40498e-06	767512316	1.1205e-07
		LTR	1537	255075273	6.02567e-06	767512316	2.00257e-06
		Other	24	6352336	3.77814e-06	767512316	3.12699e-08
		PLE	2	468608	4.26796e-06	767512316	2.60582e-09
		SINE	4	904887	4.42044e-06	767512316	5.21164e-09
		TRF	20	7604968	2.62986e-06	767512316	2.60582e-08
	HY_07	DNA	569	103044167	5.5219e-06	768465146	7.40437e-07
		LINE	94	11613810	8.09381e-06	768465146	1.22322e-07
		LTR	1611	255075273	6.31578e-06	768465146	2.09639e-06
		Other	36	6352336	5.66721e-06	768465146	4.68466e-08
		PLE	1	468608	2.13398e-06	768465146	1.3013e-09
		SINE	7	904887	7.73577e-06	768465146	9.10907e-09
		TRF	14	7604968	1.8409e-06	768465146	1.82181e-08
	HY_08	DNA	448	103044167	4.34765e-06	767461932	5.83742e-07
		LINE	62	11613810	5.33847e-06	767461932	8.07858e-08
		LTR	1395	255075273	5.46897e-06	767461932	1.81768e-06
		Other	21	6352336	3.30587e-06	767461932	2.73629e-08
		PLE	1	468608	2.13398e-06	767461932	1.303e-09
		SINE	1	904887	1.10511e-06	767461932	1.303e-09
		TRF	17	7604968	2.23538e-06	767461932	2.21509e-08
	HY_09	DNA	523	103044167	5.07549e-06	768241697	6.80775e-07
		LINE	84	11613810	7.23277e-06	768241697	1.09341e-07
		LTR	1539	255075273	6.03351e-06	768241697	2.00328e-06
		Other	27	6352336	4.2504e-06	768241697	3.51452e-08
		PLE	2	468608	4.26796e-06	768241697	2.60335e-09
		SINE	2	904887	2.21022e-06	768241697	2.60335e-09
		TRF	13	7604968	1.70941e-06	768241697	1.69218e-08
	HY_10	DNA	516	103044167	5.00756e-06	768207366	6.71694e-07
		LINE	95	11613810	8.17992e-06	768207366	1.23665e-07
		LTR	1424	255075273	5.58267e-06	768207366	1.85367e-06
		Other	26	6352336	4.09298e-06	768207366	3.3845e-08
		PLE	3	468608	6.40194e-06	768207366	3.9052e-09
		SINE	5	904887	5.52555e-06	768207366	6.50866e-09
		TRF	11	7604968	1.44642e-06	768207366	1.43191e-08
	HY_11	DNA	536	103044167	5.20165e-06	767718095	6.98173e-07
		LINE	99	11613810	8.52433e-06	767718095	1.28954e-07
		LTR	1512	255075273	5.92766e-06	767718095	1.96947e-06
		Other	28	6352336	4.40783e-06	767718095	3.64717e-08
		PLE	0	468608	0	767718095	0
		SINE	7	904887	7.73577e-06	767718095	9.11793e-09
		TRF	11	7604968	1.44642e-06	767718095	1.43282e-08

## Sheet: Sheet6
Mutation frequency (number of mutations divided by the total length of each region type) of indels in different transposon families.
Sample ID	Region	Number of mutation site	Length of the region	Mutation frequency (Mutation/length)	Covered bases	Mutation frequency (Mutation/covered bases)
HY_00	DNA	168	103044167	1.63037e-06	774079838	2.17032e-07
	LINE	26	11613810	2.23871e-06	774079838	3.35883e-08
	LTR	235	255075273	9.21297e-07	774079838	3.03586e-07
	Other	6	6352336	9.44534e-07	774079838	7.75114e-09
	PLE	1	468608	2.13398e-06	774079838	1.29186e-09
	SINE	3	904887	3.31533e-06	774079838	3.87557e-09
	TRF	10	7604968	1.31493e-06	774079838	1.29186e-08
HY_01	DNA	93	103044167	9.02526e-07	768778082	1.20971e-07
	LINE	17	11613810	1.46377e-06	768778082	2.2113e-08
	LTR	183	255075273	7.17435e-07	768778082	2.3804e-07
	Other	4	6352336	6.2969e-07	768778082	5.20306e-09
	PLE	1	468608	2.13398e-06	768778082	1.30077e-09
	SINE	2	904887	2.21022e-06	768778082	2.60153e-09
	TRF	4	7604968	5.25972e-07	768778082	5.20306e-09
HY_02	DNA	112	103044167	1.08691e-06	768681594	1.45704e-07
	LINE	18	11613810	1.54988e-06	768681594	2.34167e-08
	LTR	206	255075273	8.07605e-07	768681594	2.67991e-07
	Other	7	6352336	1.10196e-06	768681594	9.1065e-09
	PLE	1	468608	2.13398e-06	768681594	1.30093e-09
	SINE	2	904887	2.21022e-06	768681594	2.60186e-09
	TRF	5	7604968	6.57465e-07	768681594	6.50464e-09
HY_03	DNA	110	103044167	1.0675e-06	768495321	1.43137e-07
	LINE	14	11613810	1.20546e-06	768495321	1.82174e-08
	LTR	195	255075273	7.6448e-07	768495321	2.53743e-07
	Other	7	6352336	1.10196e-06	768495321	9.10871e-09
	PLE	0	468608	0	768495321	0
	SINE	2	904887	2.21022e-06	768495321	2.60249e-09
	TRF	6	7604968	7.88958e-07	768495321	7.80746e-09
HY_04	DNA	101	103044167	9.80162e-07	768762555	1.3138e-07
	LINE	19	11613810	1.63598e-06	768762555	2.4715e-08
	LTR	194	255075273	7.6056e-07	768762555	2.52354e-07
	Other	4	6352336	6.2969e-07	768762555	5.20317e-09
	PLE	1	468608	2.13398e-06	768762555	1.30079e-09
	SINE	2	904887	2.21022e-06	768762555	2.60158e-09
	TRF	8	7604968	1.05194e-06	768762555	1.04063e-08
HY_05	DNA	107	103044167	1.03839e-06	768715626	1.39193e-07
	LINE	19	11613810	1.63598e-06	768715626	2.47166e-08
	LTR	199	255075273	7.80162e-07	768715626	2.58873e-07
	Other	7	6352336	1.10196e-06	768715626	9.1061e-09
	PLE	1	468608	2.13398e-06	768715626	1.30087e-09
	SINE	4	904887	4.42044e-06	768715626	5.20348e-09
	TRF	8	7604968	1.05194e-06	768715626	1.0407e-08
HY_06	DNA	96	103044167	9.31639e-07	767512316	1.25079e-07
	LINE	23	11613810	1.9804e-06	767512316	2.99669e-08
	LTR	168	255075273	6.58629e-07	767512316	2.18889e-07
	Other	2	6352336	3.14845e-07	767512316	2.60582e-09
	PLE	1	468608	2.13398e-06	767512316	1.30291e-09
	SINE	3	904887	3.31533e-06	767512316	3.90873e-09
	TRF	5	7604968	6.57465e-07	767512316	6.51455e-09
HY_07	DNA	90	103044167	8.73412e-07	768465146	1.17117e-07
	LINE	20	11613810	1.72209e-06	768465146	2.60259e-08
	LTR	185	255075273	7.25276e-07	768465146	2.4074e-07
	Other	2	6352336	3.14845e-07	768465146	2.60259e-09
	PLE	1	468608	2.13398e-06	768465146	1.3013e-09
	SINE	3	904887	3.31533e-06	768465146	3.90389e-09
	TRF	7	7604968	9.20451e-07	768465146	9.10907e-09
HY_08	DNA	78	103044167	7.56957e-07	767461932	1.01634e-07
	LINE	13	11613810	1.11936e-06	767461932	1.6939e-08
	LTR	162	255075273	6.35107e-07	767461932	2.11085e-07
	Other	4	6352336	6.2969e-07	767461932	5.21198e-09
	PLE	0	468608	0	767461932	0
	SINE	0	904887	0	767461932	0
	TRF	3	7604968	3.94479e-07	767461932	3.90899e-09
HY_09	DNA	91	103044167	8.83116e-07	768241697	1.18452e-07
	LINE	15	11613810	1.29157e-06	768241697	1.95251e-08
	LTR	163	255075273	6.39027e-07	768241697	2.12173e-07
	Other	4	6352336	6.2969e-07	768241697	5.20669e-09
	PLE	0	468608	0	768241697	0
	SINE	1	904887	1.10511e-06	768241697	1.30167e-09
	TRF	4	7604968	5.25972e-07	768241697	5.20669e-09
HY_10	DNA	79	103044167	7.66662e-07	768207366	1.02837e-07
	LINE	16	11613810	1.37767e-06	768207366	2.08277e-08
	LTR	149	255075273	5.84141e-07	768207366	1.93958e-07
	Other	3	6352336	4.72267e-07	768207366	3.9052e-09
	PLE	1	468608	2.13398e-06	768207366	1.30173e-09
	SINE	3	904887	3.31533e-06	768207366	3.9052e-09
	TRF	4	7604968	5.25972e-07	768207366	5.20693e-09
HY_11	DNA	95	103044167	9.21935e-07	767718095	1.23743e-07
	LINE	20	11613810	1.72209e-06	767718095	2.60512e-08
	LTR	149	255075273	5.84141e-07	767718095	1.94082e-07
	Other	3	6352336	4.72267e-07	767718095	3.90768e-09
	PLE	1	468608	2.13398e-06	767718095	1.30256e-09
	SINE	3	904887	3.31533e-06	767718095	3.90768e-09
	TRF	4	7604968	5.25972e-07	767718095	5.21025e-09

## Sheet: Sheet7
Mutation frequency of different SNV types in the coding regions based on amino acid change.
Sample types	Sample ID	Types of mutation site	Number of mutation site	Covered bases	Mutation frequency (Mutation/covered bases)
Regenerated woodland strawberry plants	LS_rep1	nonsynonymous	2	215334078	9.2879e-09
		synonymous	1	215334078	4.6439e-09
		stopgain	0	215334078	0
		stoploss	0	215334078	0
	LS_rep2	nonsynonymous	14	204231154	6.85498e-08
		synonymous	3	204231154	1.46892e-08
		stopgain	1	204231154	4.8964e-09
		stoploss	0	204231154	0
	LS_rep3	nonsynonymous	3	214898308	1.39601e-08
		synonymous	0	214898308	0
		stopgain	0	214898308	0
		stoploss	0	214898308	0
	LS_rep4	nonsynonymous	2	214891000	9.307e-09
		synonymous	0	214891000	0
		stopgain	0	214891000	0
		stoploss	0	214891000	0
	LS_rep5	nonsynonymous	4	215320011	1.8577e-08
		synonymous	2	215320011	9.2885e-09
		stopgain	0	215320011	0
		stoploss	0	215320011	0
	LS_rep6	nonsynonymous	5	215281784	2.32254e-08
		synonymous	2	215281784	9.2901e-09
		stopgain	0	215281784	0
		stoploss	0	215281784	0
	HS_rep1	nonsynonymous	1	214651392	4.6587e-09
		synonymous	2	214651392	9.3174e-09
		stopgain	0	214651392	0
		stoploss	0	214651392	0
	HS_rep2	nonsynonymous	5	215174876	2.32369e-08
		synonymous	0	215174876	0
		stopgain	0	215174876	0
		stoploss	0	215174876	0
	HS_rep3	nonsynonymous	1	215219319	4.6464e-09
		synonymous	2	215219319	9.2928e-09
		stopgain	0	215219319	0
		stoploss	0	215219319	0
	HS_rep4	nonsynonymous	0	214767106	0
		synonymous	1	214767106	4.6562e-09
		stopgain	0	214767106	0
		stoploss	0	214767106	0
	HS_rep5	nonsynonymous	13	215189268	6.04119e-08
		synonymous	2	215189268	9.2941e-09
		stopgain	1	215189268	4.6471e-09
		stoploss	0	215189268	0
	HS_rep6	nonsynonymous	1	215018567	4.6508e-09
		synonymous	0	215018567	0
		stopgain	0	215018567	0
		stoploss	0	215018567	0
	LL_rep1	nonsynonymous	40	215094212	1.85965e-07
		synonymous	14	215094212	6.50878e-08
		stopgain	3	215094212	1.39474e-08
		stoploss	0	215094212	0
	LL_rep2	nonsynonymous	18	215033105	8.3708e-08
		synonymous	9	215033105	4.1854e-08
		stopgain	0	215033105	0
		stoploss	0	215033105	0
	LL_rep3	nonsynonymous	25	215033660	1.16261e-07
		synonymous	8	215033660	3.72035e-08
		stopgain	1	215033660	4.6504e-09
		stoploss	0	215033660	0
	LL_rep4	nonsynonymous	19	215544830	8.81487e-08
		synonymous	5	215544830	2.3197e-08
		stopgain	3	215544830	1.39182e-08
		stoploss	0	215544830	0
	LL_rep5	nonsynonymous	57	215500155	2.64501e-07
		synonymous	22	215500155	1.02088e-07
		stopgain	2	215500155	9.2807e-09
		stoploss	0	215500155	0
	LL_rep6	nonsynonymous	14	215383014	6.50005e-08
		synonymous	9	215383014	4.1786e-08
		stopgain	0	215383014	0
		stoploss	0	215383014	0
	HL_rep1	nonsynonymous	41	215172138	1.90545e-07
		synonymous	12	215172138	5.57693e-08
		stopgain	1	215172138	4.6474e-09
		stoploss	0	215172138	0
	HL_rep2	nonsynonymous	65	215119741	3.02157e-07
		synonymous	23	215119741	1.06917e-07
		stopgain	2	215119741	9.2971e-09
		stoploss	0	215119741	0
	HL_rep3	nonsynonymous	64	215118557	2.9751e-07
		synonymous	28	215118557	1.30161e-07
		stopgain	4	215118557	1.85944e-08
		stoploss	0	215118557	0
	HL_rep4	nonsynonymous	41	214954005	1.90739e-07
		synonymous	19	214954005	8.8391e-08
		stopgain	2	214954005	9.3043e-09
		stoploss	0	214954005	0
	HL_rep5	nonsynonymous	63	215350577	2.92546e-07
		synonymous	15	215350577	6.96539e-08
		stopgain	5	215350577	2.3218e-08
		stoploss	0	215350577	0
	HL_rep6	nonsynonymous	74	215132204	3.43974e-07
		synonymous	22	215132204	1.02263e-07
		stopgain	2	215132204	9.2966e-09
		stoploss	0	215132204	0
	CA_rep1	nonsynonymous	59	215020830	2.74392e-07
		synonymous	21	215020830	9.7665e-08
		stopgain	3	215020830	1.39521e-08
		stoploss	0	215020830	0
	CA_rep2	nonsynonymous	64	214654086	2.98154e-07
		synonymous	18	214654086	8.38558e-08
		stopgain	5	214654086	2.32933e-08
		stoploss	0	214654086	0
	CA_rep3	nonsynonymous	38	214681109	1.77007e-07
		synonymous	10	214681109	4.65807e-08
		stopgain	2	214681109	9.3161e-09
		stoploss	1	214681109	4.6581e-09
‘Beni hoppe’ individuals	HY_00	nonsynonymous	269	774079838	3.47509e-07
		synonymous	159	774079838	2.05405e-07
		stopgain	5	774079838	6.45928e-09
		stoploss	1	774079838	1.29186e-09
	HY_01	nonsynonymous	320	768778082	4.16245e-07
		synonymous	173	768778082	2.25032e-07
		stopgain	12	768778082	1.56092e-08
		stoploss	2	768778082	2.60153e-09
	HY_02	nonsynonymous	312	768681594	4.0589e-07
		synonymous	182	768681594	2.36769e-07
		stopgain	13	768681594	1.69121e-08
		stoploss	3	768681594	3.90279e-09
	HY_03	nonsynonymous	334	768495321	4.34616e-07
		synonymous	207	768495321	2.69358e-07
		stopgain	9	768495321	1.17112e-08
		stoploss	2	768495321	2.60249e-09
	HY_04	nonsynonymous	299	768762555	3.88937e-07
		synonymous	175	768762555	2.27639e-07
		stopgain	9	768762555	1.17071e-08
		stoploss	1	768762555	1.30079e-09
	HY_05	nonsynonymous	307	768715626	3.99367e-07
		synonymous	184	768715626	2.3936e-07
		stopgain	10	768715626	1.30087e-08
		stoploss	2	768715626	2.60174e-09
	HY_06	nonsynonymous	298	767512316	3.88267e-07
		synonymous	162	767512316	2.11072e-07
		stopgain	8	767512316	1.04233e-08
		stoploss	0	767512316	0
	HY_07	nonsynonymous	336	768465146	4.37235e-07
		synonymous	189	768465146	2.45945e-07
		stopgain	9	768465146	1.17117e-08
		stoploss	1	768465146	1.3013e-09
	HY_08	nonsynonymous	292	767461932	3.80475e-07
		synonymous	153	767461932	1.99358e-07
		stopgain	11	767461932	1.4333e-08
		stoploss	3	767461932	3.90899e-09
	HY_09	nonsynonymous	296	768241697	3.85295e-07
		synonymous	185	768241697	2.4081e-07
		stopgain	9	768241697	1.17151e-08
		stoploss	1	768241697	1.30167e-09
	HY_10	nonsynonymous	293	768207366	3.81407e-07
		synonymous	163	768207366	2.12182e-07
		stopgain	12	768207366	1.56208e-08
		stoploss	0	768207366	0
	HY_11	nonsynonymous	327	767718095	4.25938e-07
		synonymous	179	767718095	2.33159e-07
		stopgain	9	767718095	1.17231e-08
		stoploss	1	767718095	1.30256e-09

## Sheet: Sheet8
Mutation frequency of neutral and deleterious SNVs of the nonsynonymous type in regenerated woodland strawberry plants.
Sample ID	Types of mutation site	Number of mutation site	Covered bases	Mutation frequency (Mutation/covered bases)
LS_rep1	neutral	2	215334078	9.2879e-09
	deleterious	0	215334078	0
LS_rep2	neutral	12	204231154	5.8757e-08
	deleterious	2	204231154	9.7928e-09
LS_rep3	neutral	0	214898308	0
	deleterious	3	214898308	1.39601e-08
LS_rep4	neutral	0	214891000	0
	deleterious	2	214891000	9.307e-09
LS_rep5	neutral	3	215320011	1.39328e-08
	deleterious	1	215320011	4.6443e-09
LS_rep6	neutral	2	215281784	9.2901e-09
	deleterious	3	215281784	1.39352e-08
HS_rep1	neutral	0	214651392	0
	deleterious	1	214651392	4.6587e-09
HS_rep2	neutral	3	215174876	1.39421e-08
	deleterious	2	215174876	9.2948e-09
HS_rep3	neutral	1	215219319	4.6464e-09
	deleterious	0	215219319	0
HS_rep4	neutral	0	214767106	0
	deleterious	0	214767106	0
HS_rep5	neutral	4	215189268	1.85883e-08
	deleterious	9	215189268	4.18236e-08
HS_rep6	neutral	0	215018567	0
	deleterious	1	215018567	4.6508e-09
LL_rep1	neutral	22	215094212	1.02281e-07
	deleterious	18	215094212	8.36843e-08
LL_rep2	neutral	8	215033105	3.72036e-08
	deleterious	10	215033105	4.65045e-08
LL_rep3	neutral	11	215033660	5.11548e-08
	deleterious	14	215033660	6.51061e-08
LL_rep4	neutral	9	215544830	4.17547e-08
	deleterious	10	215544830	4.63941e-08
LL_rep5	neutral	25	215500155	1.16009e-07
	deleterious	32	215500155	1.48492e-07
LL_rep6	neutral	8	215383014	3.71431e-08
	deleterious	6	215383014	2.78573e-08
HL_rep1	neutral	23	215172138	1.06891e-07
	deleterious	18	215172138	8.3654e-08
HL_rep2	neutral	34	215119741	1.58052e-07
	deleterious	31	215119741	1.44106e-07
HL_rep3	neutral	35	215118557	1.62701e-07
	deleterious	29	215118557	1.34809e-07
HL_rep4	neutral	21	214954005	9.76953e-08
	deleterious	20	214954005	9.30432e-08
HL_rep5	neutral	33	215350577	1.53238e-07
	deleterious	30	215350577	1.39308e-07
HL_rep6	neutral	38	215132204	1.76636e-07
	deleterious	36	215132204	1.67339e-07
CA_rep1	neutral	25	215020830	1.16268e-07
	deleterious	34	215020830	1.58124e-07
CA_rep2	neutral	34	214654086	1.58394e-07
	deleterious	30	214654086	1.3976e-07
CA_rep3	neutral	17	214681109	7.91872e-08
	deleterious	21	214681109	9.78195e-08

## Sheet: Sheet9
Neighbor-dependent mutation frequency (number of mutations per site) at AT and GC bases in regenerated woodland strawberry plants.
Sample ID	Types of mutation site	Number of mutation site	Covered bases	Mutation frequency (Mutation/covered bases)
LS_rep1	aAa	2	215334078	9.2879e-09
	aAc	2	215334078	9.2879e-09
	aAg	1	215334078	4.6439e-09
	aAt	0	215334078	0
	cAa	1	215334078	4.6439e-09
	cAc	1	215334078	4.6439e-09
	cAg	1	215334078	4.6439e-09
	cAt	1	215334078	4.6439e-09
	gAa	0	215334078	0
	gAc	0	215334078	0
	gAg	0	215334078	0
	gAt	0	215334078	0
	tAa	0	215334078	0
	tAc	0	215334078	0
	tAg	0	215334078	0
	tAt	1	215334078	4.6439e-09
	aCa	1	215334078	4.6439e-09
	aCc	0	215334078	0
	aCg	1	215334078	4.6439e-09
	aCt	0	215334078	0
	cCa	0	215334078	0
	cCc	0	215334078	0
	cCg	1	215334078	4.6439e-09
	cCt	1	215334078	4.6439e-09
	gCa	2	215334078	9.2879e-09
	gCc	1	215334078	4.6439e-09
	gCg	1	215334078	4.6439e-09
	gCt	0	215334078	0
	tCa	0	215334078	0
	tCc	0	215334078	0
	tCg	0	215334078	0
	tCt	3	215334078	1.39318e-08
LS_rep2	aAa	23	204231154	1.12617e-07
	aAc	7	204231154	3.42749e-08
	aAg	10	204231154	4.89641e-08
	aAt	10	204231154	4.89641e-08
	cAa	1	204231154	4.8964e-09
	cAc	4	204231154	1.95857e-08
	cAg	1	204231154	4.8964e-09
	cAt	5	204231154	2.44821e-08
	gAa	2	204231154	9.7928e-09
	gAc	0	204231154	0
	gAg	0	204231154	0
	gAt	3	204231154	1.46892e-08
	tAa	2	204231154	9.7928e-09
	tAc	0	204231154	0
	tAg	5	204231154	2.44821e-08
	tAt	5	204231154	2.44821e-08
	aCa	2	204231154	9.7928e-09
	aCc	1	204231154	4.8964e-09
	aCg	2	204231154	9.7928e-09
	aCt	1	204231154	4.8964e-09
	cCa	1	204231154	4.8964e-09
	cCc	0	204231154	0
	cCg	1	204231154	4.8964e-09
	cCt	2	204231154	9.7928e-09
	gCa	0	204231154	0
	gCc	1	204231154	4.8964e-09
	gCg	1	204231154	4.8964e-09
	gCt	2	204231154	9.7928e-09
	tCa	3	204231154	1.46892e-08
	tCc	0	204231154	0
	tCg	1	204231154	4.8964e-09
	tCt	3	204231154	1.46892e-08
LS_rep3	aAa	2	214898308	9.3067e-09
	aAc	1	214898308	4.6534e-09
	aAg	2	214898308	9.3067e-09
	aAt	2	214898308	9.3067e-09
	cAa	0	214898308	0
	cAc	1	214898308	4.6534e-09
	cAg	2	214898308	9.3067e-09
	cAt	1	214898308	4.6534e-09
	gAa	0	214898308	0
	gAc	0	214898308	0
	gAg	0	214898308	0
	gAt	1	214898308	4.6534e-09
	tAa	0	214898308	0
	tAc	0	214898308	0
	tAg	1	214898308	4.6534e-09
	tAt	2	214898308	9.3067e-09
	aCa	0	214898308	0
	aCc	0	214898308	0
	aCg	1	214898308	4.6534e-09
	aCt	0	214898308	0
	cCa	0	214898308	0
	cCc	2	214898308	9.3067e-09
	cCg	2	214898308	9.3067e-09
	cCt	1	214898308	4.6534e-09
	gCa	1	214898308	4.6534e-09
	gCc	0	214898308	0
	gCg	0	214898308	0
	gCt	1	214898308	4.6534e-09
	tCa	1	214898308	4.6534e-09
	tCc	0	214898308	0
	tCg	0	214898308	0
	tCt	1	214898308	4.6534e-09
LS_rep4	aAa	1	214891000	4.6535e-09
	aAc	1	214891000	4.6535e-09
	aAg	0	214891000	0
	aAt	1	214891000	4.6535e-09
	cAa	1	214891000	4.6535e-09
	cAc	1	214891000	4.6535e-09
	cAg	0	214891000	0
	cAt	0	214891000	0
	gAa	1	214891000	4.6535e-09
	gAc	1	214891000	4.6535e-09
	gAg	0	214891000	0
	gAt	1	214891000	4.6535e-09
	tAa	0	214891000	0
	tAc	0	214891000	0
	tAg	0	214891000	0
	tAt	0	214891000	0
	aCa	0	214891000	0
	aCc	1	214891000	4.6535e-09
	aCg	1	214891000	4.6535e-09
	aCt	1	214891000	4.6535e-09
	cCa	0	214891000	0
	cCc	0	214891000	0
	cCg	0	214891000	0
	cCt	0	214891000	0
	gCa	0	214891000	0
	gCc	0	214891000	0
	gCg	0	214891000	0
	gCt	1	214891000	4.6535e-09
	tCa	1	214891000	4.6535e-09
	tCc	0	214891000	0
	tCg	0	214891000	0
	tCt	2	214891000	9.307e-09
LS_rep5	aAa	1	215320011	4.6443e-09
	aAc	5	215320011	2.32213e-08
	aAg	1	215320011	4.6443e-09
	aAt	0	215320011	0
	cAa	2	215320011	9.2885e-09
	cAc	3	215320011	1.39328e-08
	cAg	2	215320011	9.2885e-09
	cAt	2	215320011	9.2885e-09
	gAa	0	215320011	0
	gAc	0	215320011	0
	gAg	0	215320011	0
	gAt	1	215320011	4.6443e-09
	tAa	0	215320011	0
	tAc	1	215320011	4.6443e-09
	tAg	1	215320011	4.6443e-09
	tAt	2	215320011	9.2885e-09
	aCa	2	215320011	9.2885e-09
	aCc	1	215320011	4.6443e-09
	aCg	2	215320011	9.2885e-09
	aCt	0	215320011	0
	cCa	0	215320011	0
	cCc	0	215320011	0
	cCg	0	215320011	0
	cCt	0	215320011	0
	gCa	0	215320011	0
	gCc	0	215320011	0
	gCg	0	215320011	0
	gCt	1	215320011	4.6443e-09
	tCa	2	215320011	9.2885e-09
	tCc	0	215320011	0
	tCg	1	215320011	4.6443e-09
	tCt	2	215320011	9.2885e-09
LS_rep6	aAa	1	215281784	4.6451e-09
	aAc	1	215281784	4.6451e-09
	aAg	3	215281784	1.39352e-08
	aAt	0	215281784	0
	cAa	1	215281784	4.6451e-09
	cAc	0	215281784	0
	cAg	0	215281784	0
	cAt	2	215281784	9.2901e-09
	gAa	0	215281784	0
	gAc	0	215281784	0
	gAg	0	215281784	0
	gAt	2	215281784	9.2901e-09
	tAa	0	215281784	0
	tAc	0	215281784	0
	tAg	0	215281784	0
	tAt	2	215281784	9.2901e-09
	aCa	1	215281784	4.6451e-09
	aCc	1	215281784	4.6451e-09
	aCg	1	215281784	4.6451e-09
	aCt	1	215281784	4.6451e-09
	cCa	0	215281784	0
	cCc	0	215281784	0
	cCg	0	215281784	0
	cCt	3	215281784	1.39352e-08
	gCa	0	215281784	0
	gCc	0	215281784	0
	gCg	0	215281784	0
	gCt	0	215281784	0
	tCa	1	215281784	4.6451e-09
	tCc	0	215281784	0
	tCg	1	215281784	4.6451e-09
	tCt	2	215281784	9.2901e-09
HS_rep1	aAa	3	214651392	1.39761e-08
	aAc	0	214651392	0
	aAg	2	214651392	9.3174e-09
	aAt	1	214651392	4.6587e-09
	cAa	3	214651392	1.39761e-08
	cAc	2	214651392	9.3174e-09
	cAg	0	214651392	0
	cAt	2	214651392	9.3174e-09
	gAa	1	214651392	4.6587e-09
	gAc	0	214651392	0
	gAg	0	214651392	0
	gAt	0	214651392	0
	tAa	1	214651392	4.6587e-09
	tAc	0	214651392	0
	tAg	1	214651392	4.6587e-09
	tAt	4	214651392	1.86349e-08
	aCa	2	214651392	9.3174e-09
	aCc	0	214651392	0
	aCg	0	214651392	0
	aCt	1	214651392	4.6587e-09
	cCa	1	214651392	4.6587e-09
	cCc	0	214651392	0
	cCg	1	214651392	4.6587e-09
	cCt	0	214651392	0
	gCa	0	214651392	0
	gCc	0	214651392	0
	gCg	0	214651392	0
	gCt	0	214651392	0
	tCa	1	214651392	4.6587e-09
	tCc	1	214651392	4.6587e-09
	tCg	0	214651392	0
	tCt	0	214651392	0
HS_rep2	aAa	1	215174876	4.6474e-09
	aAc	0	215174876	0
	aAg	3	215174876	1.39421e-08
	aAt	2	215174876	9.2948e-09
	cAa	1	215174876	4.6474e-09
	cAc	2	215174876	9.2948e-09
	cAg	1	215174876	4.6474e-09
	cAt	1	215174876	4.6474e-09
	gAa	0	215174876	0
	gAc	1	215174876	4.6474e-09
	gAg	0	215174876	0
	gAt	0	215174876	0
	tAa	0	215174876	0
	tAc	1	215174876	4.6474e-09
	tAg	1	215174876	4.6474e-09
	tAt	4	215174876	1.85895e-08
	aCa	0	215174876	0
	aCc	0	215174876	0
	aCg	2	215174876	9.2948e-09
	aCt	1	215174876	4.6474e-09
	cCa	2	215174876	9.2948e-09
	cCc	2	215174876	9.2948e-09
	cCg	3	215174876	1.39421e-08
	cCt	0	215174876	0
	gCa	1	215174876	4.6474e-09
	gCc	0	215174876	0
	gCg	0	215174876	0
	gCt	0	215174876	0
	tCa	2	215174876	9.2948e-09
	tCc	1	215174876	4.6474e-09
	tCg	0	215174876	0
	tCt	3	215174876	1.39421e-08
HS_rep3	aAa	1	215219319	4.6464e-09
	aAc	0	215219319	0
	aAg	1	215219319	4.6464e-09
	aAt	1	215219319	4.6464e-09
	cAa	1	215219319	4.6464e-09
	cAc	0	215219319	0
	cAg	0	215219319	0
	cAt	2	215219319	9.2928e-09
	gAa	1	215219319	4.6464e-09
	gAc	0	215219319	0
	gAg	0	215219319	0
	gAt	2	215219319	9.2928e-09
	tAa	0	215219319	0
	tAc	0	215219319	0
	tAg	1	215219319	4.6464e-09
	tAt	2	215219319	9.2928e-09
	aCa	1	215219319	4.6464e-09
	aCc	0	215219319	0
	aCg	3	215219319	1.39393e-08
	aCt	1	215219319	4.6464e-09
	cCa	1	215219319	4.6464e-09
	cCc	1	215219319	4.6464e-09
	cCg	0	215219319	0
	cCt	3	215219319	1.39393e-08
	gCa	1	215219319	4.6464e-09
	gCc	0	215219319	0
	gCg	2	215219319	9.2928e-09
	gCt	0	215219319	0
	tCa	0	215219319	0
	tCc	0	215219319	0
	tCg	0	215219319	0
	tCt	5	215219319	2.32321e-08
HS_rep4	aAa	0	214767106	0
	aAc	0	214767106	0
	aAg	0	214767106	0
	aAt	0	214767106	0
	cAa	1	214767106	4.6562e-09
	cAc	0	214767106	0
	cAg	0	214767106	0
	cAt	0	214767106	0
	gAa	0	214767106	0
	gAc	0	214767106	0
	gAg	0	214767106	0
	gAt	0	214767106	0
	tAa	0	214767106	0
	tAc	0	214767106	0
	tAg	0	214767106	0
	tAt	0	214767106	0
	aCa	0	214767106	0
	aCc	0	214767106	0
	aCg	0	214767106	0
	aCt	0	214767106	0
	cCa	0	214767106	0
	cCc	1	214767106	4.6562e-09
	cCg	1	214767106	4.6562e-09
	cCt	2	214767106	9.3124e-09
	gCa	0	214767106	0
	gCc	0	214767106	0
	gCg	0	214767106	0
	gCt	0	214767106	0
	tCa	0	214767106	0
	tCc	0	214767106	0
	tCg	1	214767106	4.6562e-09
	tCt	1	214767106	4.6562e-09
HS_rep5	aAa	3	215189268	1.39412e-08
	aAc	3	215189268	1.39412e-08
	aAg	3	215189268	1.39412e-08
	aAt	9	215189268	4.18236e-08
	cAa	0	215189268	0
	cAc	1	215189268	4.6471e-09
	cAg	1	215189268	4.6471e-09
	cAt	11	215189268	5.11178e-08
	gAa	4	215189268	1.85883e-08
	gAc	2	215189268	9.2941e-09
	gAg	0	215189268	0
	gAt	12	215189268	5.57649e-08
	tAa	0	215189268	0
	tAc	0	215189268	0
	tAg	1	215189268	4.6471e-09
	tAt	11	215189268	5.11178e-08
	aCa	4	215189268	1.85883e-08
	aCc	4	215189268	1.85883e-08
	aCg	0	215189268	0
	aCt	11	215189268	5.11178e-08
	cCa	2	215189268	9.2941e-09
	cCc	1	215189268	4.6471e-09
	cCg	1	215189268	4.6471e-09
	cCt	8	215189268	3.71766e-08
	gCa	2	215189268	9.2941e-09
	gCc	1	215189268	4.6471e-09
	gCg	2	215189268	9.2941e-09
	gCt	2	215189268	9.2941e-09
	tCa	4	215189268	1.85883e-08
	tCc	1	215189268	4.6471e-09
	tCg	1	215189268	4.6471e-09
	tCt	16	215189268	7.43532e-08
HS_rep6	aAa	0	215018567	0
	aAc	1	215018567	4.6508e-09
	aAg	0	215018567	0
	aAt	2	215018567	9.3015e-09
	cAa	1	215018567	4.6508e-09
	cAc	0	215018567	0
	cAg	1	215018567	4.6508e-09
	cAt	1	215018567	4.6508e-09
	gAa	0	215018567	0
	gAc	1	215018567	4.6508e-09
	gAg	0	215018567	0
	gAt	1	215018567	4.6508e-09
	tAa	1	215018567	4.6508e-09
	tAc	0	215018567	0
	tAg	0	215018567	0
	tAt	1	215018567	4.6508e-09
	aCa	0	215018567	0
	aCc	0	215018567	0
	aCg	0	215018567	0
	aCt	0	215018567	0
	cCa	0	215018567	0
	cCc	1	215018567	4.6508e-09
	cCg	0	215018567	0
	cCt	1	215018567	4.6508e-09
	gCa	0	215018567	0
	gCc	0	215018567	0
	gCg	0	215018567	0
	gCt	0	215018567	0
	tCa	1	215018567	4.6508e-09
	tCc	0	215018567	0
	tCg	0	215018567	0
	tCt	2	215018567	9.3015e-09
LL_rep1	aAa	2	215094212	9.2983e-09
	aAc	1	215094212	4.6491e-09
	aAg	1	215094212	4.6491e-09
	aAt	22	215094212	1.02281e-07
	cAa	1	215094212	4.6491e-09
	cAc	1	215094212	4.6491e-09
	cAg	3	215094212	1.39474e-08
	cAt	16	215094212	7.4386e-08
	gAa	2	215094212	9.2983e-09
	gAc	2	215094212	9.2983e-09
	gAg	2	215094212	9.2983e-09
	gAt	11	215094212	5.11404e-08
	tAa	2	215094212	9.2983e-09
	tAc	4	215094212	1.85965e-08
	tAg	1	215094212	4.6491e-09
	tAt	18	215094212	8.36843e-08
	aCa	12	215094212	5.57895e-08
	aCc	6	215094212	2.78948e-08
	aCg	5	215094212	2.32456e-08
	aCt	16	215094212	7.4386e-08
	cCa	5	215094212	2.32456e-08
	cCc	11	215094212	5.11404e-08
	cCg	9	215094212	4.18421e-08
	cCt	23	215094212	1.0693e-07
	gCa	6	215094212	2.78948e-08
	gCc	5	215094212	2.32456e-08
	gCg	3	215094212	1.39474e-08
	gCt	12	215094212	5.57895e-08
	tCa	12	215094212	5.57895e-08
	tCc	21	215094212	9.76316e-08
	tCg	13	215094212	6.04386e-08
	tCt	40	215094212	1.85965e-07
LL_rep2	aAa	1	215033105	4.6504e-09
	aAc	2	215033105	9.3009e-09
	aAg	0	215033105	0
	aAt	13	215033105	6.04558e-08
	cAa	0	215033105	0
	cAc	1	215033105	4.6504e-09
	cAg	0	215033105	0
	cAt	5	215033105	2.32522e-08
	gAa	1	215033105	4.6504e-09
	gAc	1	215033105	4.6504e-09
	gAg	0	215033105	0
	gAt	1	215033105	4.6504e-09
	tAa	1	215033105	4.6504e-09
	tAc	1	215033105	4.6504e-09
	tAg	0	215033105	0
	tAt	10	215033105	4.65045e-08
	aCa	3	215033105	1.39513e-08
	aCc	8	215033105	3.72036e-08
	aCg	1	215033105	4.6504e-09
	aCt	8	215033105	3.72036e-08
	cCa	6	215033105	2.79027e-08
	cCc	8	215033105	3.72036e-08
	cCg	5	215033105	2.32522e-08
	cCt	14	215033105	6.51063e-08
	gCa	4	215033105	1.86018e-08
	gCc	5	215033105	2.32522e-08
	gCg	1	215033105	4.6504e-09
	gCt	9	215033105	4.1854e-08
	tCa	11	215033105	5.11549e-08
	tCc	13	215033105	6.04558e-08
	tCg	4	215033105	1.86018e-08
	tCt	28	215033105	1.30212e-07
LL_rep3	aAa	0	215033660	0
	aAc	1	215033660	4.6504e-09
	aAg	2	215033660	9.3009e-09
	aAt	15	215033660	6.97565e-08
	cAa	2	215033660	9.3009e-09
	cAc	1	215033660	4.6504e-09
	cAg	1	215033660	4.6504e-09
	cAt	10	215033660	4.65043e-08
	gAa	1	215033660	4.6504e-09
	gAc	1	215033660	4.6504e-09
	gAg	1	215033660	4.6504e-09
	gAt	7	215033660	3.2553e-08
	tAa	0	215033660	0
	tAc	1	215033660	4.6504e-09
	tAg	2	215033660	9.3009e-09
	tAt	24	215033660	1.1161e-07
	aCa	7	215033660	3.2553e-08
	aCc	11	215033660	5.11548e-08
	aCg	1	215033660	4.6504e-09
	aCt	10	215033660	4.65043e-08
	cCa	2	215033660	9.3009e-09
	cCc	4	215033660	1.86017e-08
	cCg	3	215033660	1.39513e-08
	cCt	17	215033660	7.90574e-08
	gCa	1	215033660	4.6504e-09
	gCc	1	215033660	4.6504e-09
	gCg	3	215033660	1.39513e-08
	gCt	7	215033660	3.2553e-08
	tCa	4	215033660	1.86017e-08
	tCc	7	215033660	3.2553e-08
	tCg	3	215033660	1.39513e-08
	tCt	30	215033660	1.39513e-07
LL_rep4	aAa	3	215544830	1.39182e-08
	aAc	0	215544830	0
	aAg	1	215544830	4.6394e-09
	aAt	13	215544830	6.03123e-08
	cAa	1	215544830	4.6394e-09
	cAc	0	215544830	0
	cAg	1	215544830	4.6394e-09
	cAt	13	215544830	6.03123e-08
	gAa	2	215544830	9.2788e-09
	gAc	0	215544830	0
	gAg	1	215544830	4.6394e-09
	gAt	9	215544830	4.17547e-08
	tAa	1	215544830	4.6394e-09
	tAc	4	215544830	1.85576e-08
	tAg	0	215544830	0
	tAt	20	215544830	9.27881e-08
	aCa	1	215544830	4.6394e-09
	aCc	7	215544830	3.24758e-08
	aCg	2	215544830	9.2788e-09
	aCt	18	215544830	8.35093e-08
	cCa	1	215544830	4.6394e-09
	cCc	1	215544830	4.6394e-09
	cCg	1	215544830	4.6394e-09
	cCt	18	215544830	8.35093e-08
	gCa	4	215544830	1.85576e-08
	gCc	4	215544830	1.85576e-08
	gCg	0	215544830	0
	gCt	7	215544830	3.24758e-08
	tCa	10	215544830	4.63941e-08
	tCc	1	215544830	4.6394e-09
	tCg	3	215544830	1.39182e-08
	tCt	24	215544830	1.11346e-07
LL_rep5	aAa	7	215500155	3.24826e-08
	aAc	2	215500155	9.2807e-09
	aAg	5	215500155	2.32018e-08
	aAt	42	215500155	1.94896e-07
	cAa	8	215500155	3.71229e-08
	cAc	2	215500155	9.2807e-09
	cAg	8	215500155	3.71229e-08
	cAt	48	215500155	2.22738e-07
	gAa	2	215500155	9.2807e-09
	gAc	2	215500155	9.2807e-09
	gAg	3	215500155	1.39211e-08
	gAt	24	215500155	1.11369e-07
	tAa	1	215500155	4.6404e-09
	tAc	5	215500155	2.32018e-08
	tAg	8	215500155	3.71229e-08
	tAt	52	215500155	2.41299e-07
	aCa	12	215500155	5.56844e-08
	aCc	17	215500155	7.88863e-08
	aCg	6	215500155	2.78422e-08
	aCt	34	215500155	1.57773e-07
	cCa	10	215500155	4.64037e-08
	cCc	17	215500155	7.88863e-08
	cCg	11	215500155	5.1044e-08
	cCt	14	215500155	6.49652e-08
	gCa	7	215500155	3.24826e-08
	gCc	18	215500155	8.35266e-08
	gCg	1	215500155	4.6404e-09
	gCt	8	215500155	3.71229e-08
	tCa	19	215500155	8.8167e-08
	tCc	21	215500155	9.74477e-08
	tCg	5	215500155	2.32018e-08
	tCt	50	215500155	2.32018e-07
LL_rep6	aAa	4	215383014	1.85716e-08
	aAc	2	215383014	9.2858e-09
	aAg	0	215383014	0
	aAt	12	215383014	5.57147e-08
	cAa	0	215383014	0
	cAc	0	215383014	0
	cAg	1	215383014	4.6429e-09
	cAt	4	215383014	1.85716e-08
	gAa	1	215383014	4.6429e-09
	gAc	0	215383014	0
	gAg	2	215383014	9.2858e-09
	gAt	8	215383014	3.71431e-08
	tAa	0	215383014	0
	tAc	1	215383014	4.6429e-09
	tAg	0	215383014	0
	tAt	4	215383014	1.85716e-08
	aCa	3	215383014	1.39287e-08
	aCc	3	215383014	1.39287e-08
	aCg	2	215383014	9.2858e-09
	aCt	5	215383014	2.32145e-08
	cCa	4	215383014	1.85716e-08
	cCc	3	215383014	1.39287e-08
	cCg	5	215383014	2.32145e-08
	cCt	9	215383014	4.1786e-08
	gCa	1	215383014	4.6429e-09
	gCc	4	215383014	1.85716e-08
	gCg	4	215383014	1.85716e-08
	gCt	7	215383014	3.25002e-08
	tCa	6	215383014	2.78573e-08
	tCc	16	215383014	7.42863e-08
	tCg	4	215383014	1.85716e-08
	tCt	13	215383014	6.03576e-08
HL_rep1	aAa	2	215172138	9.2949e-09
	aAc	5	215172138	2.32372e-08
	aAg	2	215172138	9.2949e-09
	aAt	32	215172138	1.48718e-07
	cAa	2	215172138	9.2949e-09
	cAc	5	215172138	2.32372e-08
	cAg	4	215172138	1.85898e-08
	cAt	17	215172138	7.90065e-08
	gAa	4	215172138	1.85898e-08
	gAc	1	215172138	4.6474e-09
	gAg	1	215172138	4.6474e-09
	gAt	9	215172138	4.1827e-08
	tAa	0	215172138	0
	tAc	1	215172138	4.6474e-09
	tAg	2	215172138	9.2949e-09
	tAt	18	215172138	8.3654e-08
	aCa	8	215172138	3.71795e-08
	aCc	15	215172138	6.97116e-08
	aCg	7	215172138	3.25321e-08
	aCt	22	215172138	1.02244e-07
	cCa	5	215172138	2.32372e-08
	cCc	15	215172138	6.97116e-08
	cCg	6	215172138	2.78847e-08
	cCt	32	215172138	1.48718e-07
	gCa	8	215172138	3.71795e-08
	gCc	12	215172138	5.57693e-08
	gCg	2	215172138	9.2949e-09
	gCt	19	215172138	8.83014e-08
	tCa	15	215172138	6.97116e-08
	tCc	18	215172138	8.3654e-08
	tCg	15	215172138	6.97116e-08
	tCt	44	215172138	2.04487e-07
HL_rep2	aAa	11	215119741	5.11343e-08
	aAc	8	215119741	3.71886e-08
	aAg	19	215119741	8.83229e-08
	aAt	78	215119741	3.62589e-07
	cAa	15	215119741	6.97286e-08
	cAc	19	215119741	8.83229e-08
	cAg	32	215119741	1.48754e-07
	cAt	72	215119741	3.34697e-07
	gAa	7	215119741	3.254e-08
	gAc	8	215119741	3.71886e-08
	gAg	14	215119741	6.508e-08
	gAt	21	215119741	9.76201e-08
	tAa	16	215119741	7.43772e-08
	tAc	13	215119741	6.04315e-08
	tAg	18	215119741	8.36743e-08
	tAt	116	215119741	5.39235e-07
	aCa	3	215119741	1.39457e-08
	aCc	10	215119741	4.64857e-08
	aCg	5	215119741	2.32429e-08
	aCt	21	215119741	9.76201e-08
	cCa	8	215119741	3.71886e-08
	cCc	10	215119741	4.64857e-08
	cCg	5	215119741	2.32429e-08
	cCt	19	215119741	8.83229e-08
	gCa	5	215119741	2.32429e-08
	gCc	11	215119741	5.11343e-08
	gCg	7	215119741	3.254e-08
	gCt	17	215119741	7.90258e-08
	tCa	14	215119741	6.508e-08
	tCc	16	215119741	7.43772e-08
	tCg	6	215119741	2.78914e-08
	tCt	31	215119741	1.44106e-07
HL_rep3	aAa	6	215118557	2.78916e-08
	aAc	4	215118557	1.85944e-08
	aAg	10	215118557	4.6486e-08
	aAt	58	215118557	2.69619e-07
	cAa	9	215118557	4.18374e-08
	cAc	11	215118557	5.11346e-08
	cAg	5	215118557	2.3243e-08
	cAt	46	215118557	2.13836e-07
	gAa	3	215118557	1.39458e-08
	gAc	8	215118557	3.71888e-08
	gAg	5	215118557	2.3243e-08
	gAt	35	215118557	1.62701e-07
	tAa	5	215118557	2.3243e-08
	tAc	4	215118557	1.85944e-08
	tAg	8	215118557	3.71888e-08
	tAt	56	215118557	2.60322e-07
	aCa	12	215118557	5.57832e-08
	aCc	14	215118557	6.50804e-08
	aCg	5	215118557	2.3243e-08
	aCt	27	215118557	1.25512e-07
	cCa	12	215118557	5.57832e-08
	cCc	4	215118557	1.85944e-08
	cCg	11	215118557	5.11346e-08
	cCt	26	215118557	1.20864e-07
	gCa	8	215118557	3.71888e-08
	gCc	14	215118557	6.50804e-08
	gCg	5	215118557	2.3243e-08
	gCt	15	215118557	6.9729e-08
	tCa	15	215118557	6.9729e-08
	tCc	29	215118557	1.34809e-07
	tCg	5	215118557	2.3243e-08
	tCt	57	215118557	2.6497e-07
HL_rep4	aAa	5	214954005	2.32608e-08
	aAc	3	214954005	1.39565e-08
	aAg	14	214954005	6.51302e-08
	aAt	40	214954005	1.86086e-07
	cAa	7	214954005	3.25651e-08
	cAc	7	214954005	3.25651e-08
	cAg	11	214954005	5.11737e-08
	cAt	35	214954005	1.62825e-07
	gAa	1	214954005	4.6522e-09
	gAc	4	214954005	1.86086e-08
	gAg	5	214954005	2.32608e-08
	gAt	23	214954005	1.07e-07
	tAa	5	214954005	2.32608e-08
	tAc	3	214954005	1.39565e-08
	tAg	1	214954005	4.6522e-09
	tAt	39	214954005	1.81434e-07
	aCa	13	214954005	6.04781e-08
	aCc	12	214954005	5.58259e-08
	aCg	4	214954005	1.86086e-08
	aCt	18	214954005	8.37388e-08
	cCa	4	214954005	1.86086e-08
	cCc	6	214954005	2.79129e-08
	cCg	4	214954005	1.86086e-08
	cCt	14	214954005	6.51302e-08
	gCa	8	214954005	3.72173e-08
	gCc	4	214954005	1.86086e-08
	gCg	2	214954005	9.3043e-09
	gCt	11	214954005	5.11737e-08
	tCa	12	214954005	5.58259e-08
	tCc	13	214954005	6.04781e-08
	tCg	2	214954005	9.3043e-09
	tCt	55	214954005	2.55869e-07
HL_rep5	aAa	12	215350577	5.57231e-08
	aAc	4	215350577	1.85744e-08
	aAg	15	215350577	6.96539e-08
	aAt	58	215350577	2.69328e-07
	cAa	11	215350577	5.10795e-08
	cAc	12	215350577	5.57231e-08
	cAg	14	215350577	6.50103e-08
	cAt	40	215350577	1.85744e-07
	gAa	5	215350577	2.3218e-08
	gAc	2	215350577	9.2872e-09
	gAg	8	215350577	3.71487e-08
	gAt	27	215350577	1.25377e-07
	tAa	10	215350577	4.64359e-08
	tAc	4	215350577	1.85744e-08
	tAg	9	215350577	4.17923e-08
	tAt	65	215350577	3.01833e-07
	aCa	14	215350577	6.50103e-08
	aCc	16	215350577	7.42975e-08
	aCg	5	215350577	2.3218e-08
	aCt	26	215350577	1.20733e-07
	cCa	8	215350577	3.71487e-08
	cCc	9	215350577	4.17923e-08
	cCg	8	215350577	3.71487e-08
	cCt	16	215350577	7.42975e-08
	gCa	12	215350577	5.57231e-08
	gCc	5	215350577	2.3218e-08
	gCg	2	215350577	9.2872e-09
	gCt	9	215350577	4.17923e-08
	tCa	18	215350577	8.35846e-08
	tCc	17	215350577	7.8941e-08
	tCg	9	215350577	4.17923e-08
	tCt	45	215350577	2.08962e-07
HL_rep6	aAa	6	215132204	2.78898e-08
	aAc	9	215132204	4.18347e-08
	aAg	11	215132204	5.11313e-08
	aAt	93	215132204	4.32292e-07
	cAa	11	215132204	5.11313e-08
	cAc	11	215132204	5.11313e-08
	cAg	16	215132204	7.43729e-08
	cAt	75	215132204	3.48623e-07
	gAa	6	215132204	2.78898e-08
	gAc	7	215132204	3.25381e-08
	gAg	10	215132204	4.6483e-08
	gAt	45	215132204	2.09174e-07
	tAa	10	215132204	4.6483e-08
	tAc	10	215132204	4.6483e-08
	tAg	12	215132204	5.57797e-08
	tAt	100	215132204	4.6483e-07
	aCa	10	215132204	4.6483e-08
	aCc	13	215132204	6.0428e-08
	aCg	6	215132204	2.78898e-08
	aCt	30	215132204	1.39449e-07
	cCa	8	215132204	3.71864e-08
	cCc	17	215132204	7.90212e-08
	cCg	9	215132204	4.18347e-08
	cCt	20	215132204	9.29661e-08
	gCa	9	215132204	4.18347e-08
	gCc	14	215132204	6.50763e-08
	gCg	1	215132204	4.6483e-09
	gCt	11	215132204	5.11313e-08
	tCa	11	215132204	5.11313e-08
	tCc	24	215132204	1.11559e-07
	tCg	8	215132204	3.71864e-08
	tCt	29	215132204	1.34801e-07
CA_rep1	aAa	16	215020830	7.44114e-08
	aAc	2	215020830	9.3014e-09
	aAg	14	215020830	6.511e-08
	aAt	70	215020830	3.2555e-07
	cAa	8	215020830	3.72057e-08
	cAc	12	215020830	5.58085e-08
	cAg	12	215020830	5.58085e-08
	cAt	56	215020830	2.6044e-07
	gAa	7	215020830	3.2555e-08
	gAc	3	215020830	1.39521e-08
	gAg	5	215020830	2.32536e-08
	gAt	27	215020830	1.25569e-07
	tAa	4	215020830	1.86028e-08
	tAc	6	215020830	2.79043e-08
	tAg	5	215020830	2.32536e-08
	tAt	74	215020830	3.44153e-07
	aCa	15	215020830	6.97607e-08
	aCc	19	215020830	8.83635e-08
	aCg	4	215020830	1.86028e-08
	aCt	20	215020830	9.30142e-08
	cCa	9	215020830	4.18564e-08
	cCc	15	215020830	6.97607e-08
	cCg	12	215020830	5.58085e-08
	cCt	24	215020830	1.11617e-07
	gCa	8	215020830	3.72057e-08
	gCc	5	215020830	2.32536e-08
	gCg	3	215020830	1.39521e-08
	gCt	15	215020830	6.97607e-08
	tCa	19	215020830	8.83635e-08
	tCc	18	215020830	8.37128e-08
	tCg	11	215020830	5.11578e-08
	tCt	48	215020830	2.23234e-07
CA_rep2	aAa	16	214654086	7.45385e-08
	aAc	5	214654086	2.32933e-08
	aAg	13	214654086	6.05626e-08
	aAt	51	214654086	2.37592e-07
	cAa	13	214654086	6.05626e-08
	cAc	16	214654086	7.45385e-08
	cAg	8	214654086	3.72693e-08
	cAt	33	214654086	1.53736e-07
	gAa	11	214654086	5.12452e-08
	gAc	8	214654086	3.72693e-08
	gAg	16	214654086	7.45385e-08
	gAt	29	214654086	1.35101e-07
	tAa	10	214654086	4.65866e-08
	tAc	4	214654086	1.86346e-08
	tAg	13	214654086	6.05626e-08
	tAt	64	214654086	2.98154e-07
	aCa	13	214654086	6.05626e-08
	aCc	21	214654086	9.78318e-08
	aCg	11	214654086	5.12452e-08
	aCt	43	214654086	2.00322e-07
	cCa	13	214654086	6.05626e-08
	cCc	7	214654086	3.26106e-08
	cCg	5	214654086	2.32933e-08
	cCt	30	214654086	1.3976e-07
	gCa	7	214654086	3.26106e-08
	gCc	3	214654086	1.3976e-08
	gCg	2	214654086	9.3173e-09
	gCt	15	214654086	6.98799e-08
	tCa	14	214654086	6.52212e-08
	tCc	14	214654086	6.52212e-08
	tCg	6	214654086	2.79519e-08
	tCt	37	214654086	1.7237e-07
CA_rep3	aAa	6	214681109	2.79484e-08
	aAc	4	214681109	1.86323e-08
	aAg	12	214681109	5.58969e-08
	aAt	44	214681109	2.04955e-07
	cAa	4	214681109	1.86323e-08
	cAc	6	214681109	2.79484e-08
	cAg	9	214681109	4.19226e-08
	cAt	37	214681109	1.72349e-07
	gAa	9	214681109	4.19226e-08
	gAc	4	214681109	1.86323e-08
	gAg	14	214681109	6.5213e-08
	gAt	17	214681109	7.91872e-08
	tAa	11	214681109	5.12388e-08
	tAc	5	214681109	2.32904e-08
	tAg	4	214681109	1.86323e-08
	tAt	42	214681109	1.95639e-07
	aCa	16	214681109	7.45291e-08
	aCc	15	214681109	6.98711e-08
	aCg	2	214681109	9.3161e-09
	aCt	27	214681109	1.25768e-07
	cCa	11	214681109	5.12388e-08
	cCc	8	214681109	3.72646e-08
	cCg	5	214681109	2.32904e-08
	cCt	22	214681109	1.02478e-07
	gCa	9	214681109	4.19226e-08
	gCc	1	214681109	4.6581e-09
	gCg	1	214681109	4.6581e-09
	gCt	8	214681109	3.72646e-08
	tCa	13	214681109	6.05549e-08
	tCc	14	214681109	6.5213e-08
	tCg	4	214681109	1.86323e-08
	tCt	40	214681109	1.86323e-07
