# Supplementary material for: Global characterization of somatic mutations and DNA methylation changes during vegetative propagation in strawberries
Source: HighWire-hosted journal article supplement (doi:10.1101/gr.279378.124), 2024-10-01
Supplement: Supplemental_Data.zip [file Original_data_of_mutations_2.xlsx]

## Sheet: LS_rep1
CHROM	POS	ID	REF	ALT	QUAL	FILTER	INFO	FORMAT	LS_rep1
Fvb1	11614609	.	C	T	423.91	PASS	AC=1;AF=0.250;AN=4;BaseQRankSum=0.167;DP=72;ExcessHet=3.0103;FS=1.079;MLEAC=1;MLEAF=0.250;MQ=40.30;MQRankSum=-0.839;QD=10.34;ReadPosRankSum=1.985;SOR=0.507	GT:AD:DP:GQ:PL	0/1:25,16:41:99:432,0,762
Fvb1	19982179	.	G	A	37.92	PASS	AC=1;AF=0.250;AN=4;BaseQRankSum=-0.554;DP=19;ExcessHet=3.0103;FS=0.000;MLEAC=1;MLEAF=0.250;MQ=56.70;MQRankSum=-0.471;QD=3.79;ReadPosRankSum=-1.679;SOR=0.648	GT:AD:DP:GQ:PL	0/1:7,3:10:46:46,0,239
Fvb2	11941	.	G	A	120.91	PASS	AC=1;AF=0.250;AN=4;BaseQRankSum=0.096;DP=36;ExcessHet=3.0103;FS=22.252;MLEAC=1;MLEAF=0.250;MQ=27.93;MQRankSum=3.020;QD=6.05;ReadPosRankSum=0.316;SOR=3.899	GT:AD:DP:GQ:PL	0/1:14,6:20:99:129,0,364
Fvb2	6875481	.	G	A	120.36	PASS	AC=1;AF=0.250;AN=4;BaseQRankSum=-1.031;DP=27;ExcessHet=3.0103;FS=16.660;MLEAC=1;MLEAF=0.250;MQ=36.54;MQRankSum=-2.286;QD=7.08;ReadPosRankSum=2.520;SOR=4.170	GT:AD:DP:GQ:PL	0/1:11,6:17:99:128,0,349
Fvb2	6875651	.	C	T	72.03	PASS	AC=1;AF=0.250;AN=4;BaseQRankSum=-0.535;DP=28;ExcessHet=3.0103;FS=12.442;MLEAC=1;MLEAF=0.250;MQ=32.05;MQRankSum=-2.147;QD=4.80;ReadPosRankSum=0.496;SOR=3.742	GT:AD:DP:GQ:PL	0/1:10,5:15:80:80,0,317
Fvb2	8847148	.	T	G	77.91	PASS	AC=1;AF=0.250;AN=4;BaseQRankSum=-2.770;DP=51;ExcessHet=3.0103;FS=21.419;MLEAC=1;MLEAF=0.250;MQ=60.00;MQRankSum=0.000;QD=2.69;ReadPosRankSum=0.068;SOR=4.697	GT:AD:DP:GQ:PL	0/1:19,10:29:86:86,0,500
Fvb3	15437759	.	T	C	179.92	PASS	AC=1;AF=0.250;AN=4;BaseQRankSum=2.318;DP=37;ExcessHet=3.0103;FS=20.096;MLEAC=1;MLEAF=0.250;MQ=45.77;MQRankSum=-2.928;QD=6.66;ReadPosRankSum=-0.804;SOR=3.238	GT:AD:DP:GQ:PL	0/1:17,10:27:99:188,0,670
Fvb3	22420559	.	T	G	113.91	PASS	AC=1;AF=0.250;AN=4;BaseQRankSum=-3.616;DP=37;ExcessHet=3.0103;FS=22.515;MLEAC=1;MLEAF=0.250;MQ=60.00;MQRankSum=0.000;QD=5.70;ReadPosRankSum=-0.369;SOR=4.403	GT:AD:DP:GQ:PL	0/1:12,8:20:99:122,0,397
Fvb4	2702989	.	T	C	196.48	PASS	AC=1;AF=0.250;AN=4;BaseQRankSum=-1.677;DP=33;ExcessHet=3.0103;FS=15.556;MLEAC=1;MLEAF=0.250;MQ=50.86;MQRankSum=-5.355;QD=8.93;ReadPosRankSum=-1.370;SOR=2.444	GT:AD:DP:GQ:PL	0/1:12,10:22:99:204,0,412
Fvb4	3216154	.	G	T	437.91	PASS	AC=1;AF=0.250;AN=4;BaseQRankSum=1.296;DP=57;ExcessHet=3.0103;FS=2.633;MLEAC=1;MLEAF=0.250;MQ=60.00;MQRankSum=0.000;QD=13.68;ReadPosRankSum=-1.262;SOR=1.118	GT:AD:DP:GQ:PL	0/1:19,13:32:99:446,0,685
Fvb4	8958341	.	A	C	56.91	PASS	AC=1;AF=0.250;AN=4;BaseQRankSum=-1.948;DP=46;ExcessHet=3.0103;FS=20.254;MLEAC=1;MLEAF=0.250;MQ=60.00;MQRankSum=0.000;QD=2.85;ReadPosRankSum=-0.401;SOR=4.168	GT:AD:DP:GQ:PL	0/1:14,6:20:65:65,0,405
Fvb4	12685411	.	G	A	301.91	PASS	AC=1;AF=0.250;AN=4;BaseQRankSum=0.957;DP=58;ExcessHet=3.0103;FS=1.369;MLEAC=1;MLEAF=0.250;MQ=55.13;MQRankSum=-0.225;QD=9.43;ReadPosRankSum=0.963;SOR=0.412	GT:AD:DP:GQ:PL	0/1:22,10:32:99:310,0,667
Fvb4	19418571	.	A	C	110.99	PASS	AC=1;AF=0.250;AN=4;BaseQRankSum=0.095;DP=36;ExcessHet=3.0103;FS=23.384;MLEAC=1;MLEAF=0.250;MQ=25.97;MQRankSum=0.883;QD=5.04;ReadPosRankSum=0.990;SOR=4.402	GT:AD:DP:GQ:PL	0/1:15,7:22:99:119,0,363
Fvb4	22588997	.	A	C	120.36	PASS	AC=1;AF=0.250;AN=4;BaseQRankSum=-3.556;DP=48;ExcessHet=3.0103;FS=10.098;MLEAC=1;MLEAF=0.250;MQ=53.13;MQRankSum=-1.530;QD=4.01;ReadPosRankSum=3.443;SOR=1.932	GT:AD:DP:GQ:PL	0/1:20,10:30:99:128,0,620
Fvb4	28942046	.	A	C	67.91	PASS	AC=1;AF=0.250;AN=4;BaseQRankSum=-3.647;DP=57;ExcessHet=3.0103;FS=35.692;MLEAC=1;MLEAF=0.250;MQ=58.88;MQRankSum=-0.316;QD=2.52;ReadPosRankSum=-0.647;SOR=4.608	GT:AD:DP:GQ:PL	0/1:18,9:27:76:76,0,623
Fvb5	6183688	.	C	T	60.62	PASS	AC=1;AF=0.250;AN=4;BaseQRankSum=0.632;DP=26;ExcessHet=3.0103;FS=0.000;MLEAC=1;MLEAF=0.250;MQ=24.17;MQRankSum=-1.561;QD=4.66;ReadPosRankSum=0.858;SOR=0.368	GT:AD:DP:GQ:PL	0/1:9,4:13:68:68,0,217
Fvb5	14119406	.	G	C	334.04	PASS	AC=1;AF=0.250;AN=4;BaseQRankSum=-0.502;DP=81;ExcessHet=3.0103;FS=11.946;MLEAC=1;MLEAF=0.250;MQ=56.88;MQRankSum=-1.740;QD=7.11;ReadPosRankSum=-2.087;SOR=1.503	GT:AD:DP:GQ:PL	0/1:31,16:47:99:341,0,914
Fvb7	6903537	.	C	T	417.91	PASS	AC=1;AF=0.250;AN=4;BaseQRankSum=-2.347;DP=58;ExcessHet=3.0103;FS=0.000;MLEAC=1;MLEAF=0.250;MQ=60.00;MQRankSum=0.000;QD=13.48;ReadPosRankSum=1.402;SOR=0.602	GT:AD:DP:GQ:PL	0/1:17,14:31:99:426,0,601
Fvb7	14928420	.	A	C	50.14	PASS	AC=1;AF=0.250;AN=4;BaseQRankSum=-2.245;DP=37;ExcessHet=3.0103;FS=21.585;MLEAC=1;MLEAF=0.250;MQ=60.00;MQRankSum=0.000;QD=2.28;ReadPosRankSum=0.037;SOR=4.657	GT:AD:DP:GQ:PL	0/1:15,7:22:58:58,0,328
contig_6	13415	.	C	T	67.91	PASS	AC=1;AF=0.250;AN=4;BaseQRankSum=0.728;DP=26;ExcessHet=3.0103;FS=21.813;MLEAC=1;MLEAF=0.250;MQ=32.64;MQRankSum=-1.935;QD=5.66;ReadPosRankSum=1.899;SOR=3.222	GT:AD:DP:GQ:PL	0/1:8,4:12:76:76,0,233
contig_6	78819	.	A	C	372.92	PASS	AC=1;AF=0.250;AN=4;BaseQRankSum=0.714;DP=32;ExcessHet=3.0103;FS=0.000;MLEAC=1;MLEAF=0.250;MQ=40.00;MQRankSum=0.000;QD=16.95;ReadPosRankSum=-0.657;SOR=0.223	GT:AD:DP:GQ:PL	0/1:12,10:22:99:381,0,471
Fvb3	28975378	.	CT	C	274.99	PASS	AC=1;AF=0.250;AN=4;BaseQRankSum=0.605;DP=50;ExcessHet=3.0103;FS=3.052;MLEAC=1;MLEAF=0.250;MQ=47.55;MQRankSum=-2.320;QD=8.59;ReadPosRankSum=-2.556;SOR=0.252	GT:AD:DP:GQ:PL	0/1:19,13:32:99:283,0,468

## Sheet: LS_rep2
CHROM	POS	ID	REF	ALT	QUAL	FILTER	INFO	FORMAT	LS_rep2
Fvb1	443017	.	A	C	63.91	PASS	AC=1;AF=0.250;AN=4;BaseQRankSum=-1.844;DP=37;ExcessHet=3.0103;FS=16.234;MLEAC=1;MLEAF=0.250;MQ=60.00;MQRankSum=0.000;QD=3.99;ReadPosRankSum=-2.152;SOR=3.907	GT:AD:DP:GQ:PL	0/1:10,6:16:72:72,0,171
Fvb1	3900372	.	A	C	31.91	PASS	AC=1;AF=0.250;AN=4;BaseQRankSum=-3.102;DP=37;ExcessHet=3.0103;FS=16.847;MLEAC=1;MLEAF=0.250;MQ=54.27;MQRankSum=1.363;QD=3.19;ReadPosRankSum=-0.269;SOR=3.230	GT:AD:DP:GQ:PL	0/1:6,4:10:40:40,0,90
Fvb1	6327751	.	A	C	36.91	PASS	AC=1;AF=0.250;AN=4;BaseQRankSum=-3.295;DP=22;ExcessHet=3.0103;FS=26.723;MLEAC=1;MLEAF=0.250;MQ=43.40;MQRankSum=-0.158;QD=4.61;ReadPosRankSum=1.256;SOR=3.585	GT:AD:DP:GQ:PL	0/1:4,4:8:45:45,0,76
Fvb1	7762500	.	T	G	53.92	PASS	AC=1;AF=0.250;AN=4;BaseQRankSum=-3.311;DP=36;ExcessHet=3.0103;FS=32.570;MLEAC=1;MLEAF=0.250;MQ=60.00;MQRankSum=0.000;QD=3.37;ReadPosRankSum=1.685;SOR=4.972	GT:AD:DP:GQ:PL	0/1:8,8:16:62:62,0,123
Fvb1	7872873	.	A	C	83.91	PASS	AC=1;AF=0.250;AN=4;BaseQRankSum=-4.689;DP=56;ExcessHet=3.0103;FS=40.219;MLEAC=1;MLEAF=0.250;MQ=60.00;MQRankSum=0.000;QD=3.23;ReadPosRankSum=-1.914;SOR=5.548	GT:AD:DP:GQ:PL	0/1:12,14:26:92:92,0,195
Fvb1	9377714	.	G	A	91.91	PASS	AC=1;AF=0.250;AN=4;BaseQRankSum=-2.486;DP=43;ExcessHet=3.0103;FS=4.126;MLEAC=1;MLEAF=0.250;MQ=51.97;MQRankSum=-3.840;QD=5.74;ReadPosRankSum=-0.838;SOR=1.206	GT:AD:DP:GQ:PL	0/1:10,6:16:99:100,0,199
Fvb1	10941457	.	T	G	60.91	PASS	AC=1;AF=0.250;AN=4;BaseQRankSum=-2.351;DP=38;ExcessHet=3.0103;FS=24.813;MLEAC=1;MLEAF=0.250;MQ=54.55;MQRankSum=-2.739;QD=2.54;ReadPosRankSum=1.466;SOR=4.400	GT:AD:DP:GQ:PL	0/1:16,8:24:69:69,0,266
Fvb1	15260403	.	A	C	33.91	PASS	AC=1;AF=0.250;AN=4;BaseQRankSum=-2.052;DP=36;ExcessHet=3.0103;FS=17.043;MLEAC=1;MLEAF=0.250;MQ=54.32;MQRankSum=-0.087;QD=2.12;ReadPosRankSum=2.603;SOR=3.904	GT:AD:DP:GQ:PL	0/1:10,6:16:42:42,0,171
Fvb1	15310994	.	G	A	229.91	PASS	AC=1;AF=0.250;AN=4;BaseQRankSum=-3.340;DP=140;ExcessHet=3.0103;FS=0.000;MLEAC=1;MLEAF=0.250;MQ=46.90;MQRankSum=-6.618;QD=6.39;ReadPosRankSum=-5.706;SOR=0.802	GT:AD:DP:GQ:PL	0/1:22,14:36:99:238,0,436
Fvb1	18311596	.	A	C	115.92	PASS	AC=1;AF=0.250;AN=4;BaseQRankSum=-2.384;DP=40;ExcessHet=3.0103;FS=8.184;MLEAC=1;MLEAF=0.250;MQ=60.00;MQRankSum=0.000;QD=14.49;ReadPosRankSum=-2.433;SOR=2.761	GT:AD:DP:GQ:PL	0/1:2,6:8:25:124,0,25
Fvb1	19058743	.	A	C	123.91	PASS	AC=1;AF=0.250;AN=4;BaseQRankSum=-2.410;DP=56;ExcessHet=3.0103;FS=37.051;MLEAC=1;MLEAF=0.250;MQ=60.00;MQRankSum=0.000;QD=3.44;ReadPosRankSum=-0.117;SOR=5.281	GT:AD:DP:GQ:PL	0/1:24,12:36:99:132,0,428
Fvb1	20593126	.	G	A	85.92	PASS	AC=1;AF=0.250;AN=4;BaseQRankSum=-1.274;DP=28;ExcessHet=3.0103;FS=2.634;MLEAC=1;MLEAF=0.250;MQ=31.14;MQRankSum=-2.319;QD=4.77;ReadPosRankSum=0.556;SOR=1.565	GT:AD:DP:GQ:PL	0/1:12,6:18:94:94,0,243
Fvb1	23305931	.	T	G	68.91	PASS	AC=1;AF=0.250;AN=4;BaseQRankSum=-3.389;DP=35;ExcessHet=3.0103;FS=42.122;MLEAC=1;MLEAF=0.250;MQ=55.03;MQRankSum=-3.731;QD=4.92;ReadPosRankSum=1.023;SOR=4.160	GT:AD:DP:GQ:PL	0/1:8,6:14:77:77,0,157
Fvb2	4661781	.	A	C	30.91	PASS	AC=1;AF=0.250;AN=4;BaseQRankSum=-2.280;DP=25;ExcessHet=3.0103;FS=20.191;MLEAC=1;MLEAF=0.250;MQ=60.00;MQRankSum=0.000;QD=3.09;ReadPosRankSum=2.771;SOR=3.223	GT:AD:DP:GQ:PL	0/1:6,4:10:39:39,0,119
Fvb2	12146624	.	A	C	64.93	PASS	AC=1;AF=0.250;AN=4;BaseQRankSum=-3.544;DP=37;ExcessHet=3.0103;FS=43.603;MLEAC=1;MLEAF=0.250;MQ=60.00;MQRankSum=0.000;QD=2.95;ReadPosRankSum=1.043;SOR=4.797	GT:AD:DP:GQ:PL	0/1:14,8:22:73:73,0,282
Fvb2	19362592	.	T	G	70.91	PASS	AC=1;AF=0.250;AN=4;BaseQRankSum=-1.791;DP=51;ExcessHet=3.0103;FS=16.423;MLEAC=1;MLEAF=0.250;MQ=59.78;MQRankSum=0.868;QD=2.53;ReadPosRankSum=0.628;SOR=4.057	GT:AD:DP:GQ:PL	0/1:18,10:28:79:79,0,216
Fvb2	19732240	.	T	G	82.91	PASS	AC=1;AF=0.250;AN=4;BaseQRankSum=-2.557;DP=36;ExcessHet=3.0103;FS=19.632;MLEAC=1;MLEAF=0.250;MQ=60.00;MQRankSum=0.000;QD=5.18;ReadPosRankSum=0.102;SOR=4.404	GT:AD:DP:GQ:PL	0/1:8,8:16:91:91,0,122
Fvb2	20866574	.	T	G	60.92	PASS	AC=1;AF=0.250;AN=4;BaseQRankSum=-3.393;DP=45;ExcessHet=3.0103;FS=34.799;MLEAC=1;MLEAF=0.250;MQ=60.00;MQRankSum=0.000;QD=2.54;ReadPosRankSum=-2.967;SOR=5.133	GT:AD:DP:GQ:PL	0/1:16,8:24:69:69,0,266
Fvb2	23375167	.	A	C	61.91	PASS	AC=1;AF=0.250;AN=4;BaseQRankSum=-4.135;DP=40;ExcessHet=3.0103;FS=21.779;MLEAC=1;MLEAF=0.250;MQ=60.00;MQRankSum=0.000;QD=3.10;ReadPosRankSum=1.786;SOR=4.676	GT:AD:DP:GQ:PL	0/1:10,10:20:70:70,0,161
Fvb2	27403331	.	T	C	659.92	PASS	AC=1;AF=0.250;AN=4;BaseQRankSum=-4.600;DP=112;ExcessHet=3.0103;FS=0.000;MLEAC=1;MLEAF=0.250;MQ=59.53;MQRankSum=-1.903;QD=8.92;ReadPosRankSum=1.597;SOR=0.690	GT:AD:DP:GQ:PL	0/1:38,36:74:99:668,0,718
Fvb2	28563511	.	A	C	30.91	PASS	AC=1;AF=0.250;AN=4;BaseQRankSum=-1.665;DP=21;ExcessHet=3.0103;FS=22.330;MLEAC=1;MLEAF=0.250;MQ=58.59;MQRankSum=0.792;QD=3.09;ReadPosRankSum=-1.482;SOR=3.222	GT:AD:DP:GQ:PL	0/1:6,4:10:39:39,0,119
Fvb2	28631900	.	T	G	54.91	PASS	AC=1;AF=0.250;AN=4;BaseQRankSum=-2.206;DP=52;ExcessHet=3.0103;FS=16.882;MLEAC=1;MLEAF=0.250;MQ=54.62;MQRankSum=-2.259;QD=2.11;ReadPosRankSum=1.021;SOR=4.155	GT:AD:DP:GQ:PL	0/1:18,8:26:63:63,0,350
Fvb2	28840811	.	A	C	37.91	PASS	AC=1;AF=0.250;AN=4;BaseQRankSum=-2.102;DP=24;ExcessHet=3.0103;FS=10.307;MLEAC=1;MLEAF=0.250;MQ=60.00;MQRankSum=0.000;QD=4.74;ReadPosRankSum=0.116;SOR=3.238	GT:AD:DP:GQ:PL	0/1:4,4:8:46:46,0,46
Fvb2	28881272	.	T	A	173.91	PASS	AC=1;AF=0.250;AN=4;BaseQRankSum=-2.694;DP=63;ExcessHet=3.0103;FS=2.741;MLEAC=1;MLEAF=0.250;MQ=60.00;MQRankSum=0.000;QD=4.58;ReadPosRankSum=-3.042;SOR=0.368	GT:AD:DP:GQ:PL	0/1:26,12:38:99:182,0,529
Fvb3	4275507	.	G	T	44.91	PASS	AC=1;AF=0.250;AN=4;BaseQRankSum=-3.452;DP=31;ExcessHet=3.0103;FS=1.826;MLEAC=1;MLEAF=0.250;MQ=60.00;MQRankSum=0.000;QD=3.74;ReadPosRankSum=1.479;SOR=1.329	GT:AD:DP:GQ:PL	0/1:6,6:12:53:53,0,114
Fvb3	4450569	.	T	G	55.91	PASS	AC=1;AF=0.250;AN=4;BaseQRankSum=-1.812;DP=30;ExcessHet=3.0103;FS=19.651;MLEAC=1;MLEAF=0.250;MQ=60.00;MQRankSum=0.000;QD=4.66;ReadPosRankSum=1.070;SOR=3.591	GT:AD:DP:GQ:PL	0/1:8,4:12:64:64,0,132
Fvb3	13076108	.	A	C	83.91	PASS	AC=1;AF=0.250;AN=4;BaseQRankSum=-1.618;DP=47;ExcessHet=3.0103;FS=13.766;MLEAC=1;MLEAF=0.250;MQ=57.24;MQRankSum=-4.134;QD=3.23;ReadPosRankSum=1.402;SOR=3.532	GT:AD:DP:GQ:PL	0/1:18,8:26:92:92,0,309
Fvb3	14172763	.	T	G	93.91	PASS	AC=1;AF=0.250;AN=4;BaseQRankSum=-3.128;DP=48;ExcessHet=3.0103;FS=39.092;MLEAC=1;MLEAF=0.250;MQ=60.00;MQRankSum=0.000;QD=4.27;ReadPosRankSum=-0.081;SOR=4.607	GT:AD:DP:GQ:PL	0/1:14,8:22:99:102,0,281
Fvb3	14366056	.	T	C	255.91	PASS	AC=1;AF=0.250;AN=4;BaseQRankSum=-1.375;DP=53;ExcessHet=3.0103;FS=0.000;MLEAC=1;MLEAF=0.250;MQ=51.51;MQRankSum=-6.360;QD=9.14;ReadPosRankSum=-0.495;SOR=0.699	GT:AD:DP:GQ:PL	0/1:14,14:28:99:264,0,203
Fvb3	15917207	.	A	C	33.91	PASS	AC=1;AF=0.250;AN=4;BaseQRankSum=-2.871;DP=40;ExcessHet=3.0103;FS=20.623;MLEAC=1;MLEAF=0.250;MQ=60.00;MQRankSum=0.000;QD=2.12;ReadPosRankSum=-1.225;SOR=4.167	GT:AD:DP:GQ:PL	0/1:10,6:16:42:42,0,172
Fvb3	19074953	.	A	C	52.91	PASS	AC=1;AF=0.250;AN=4;BaseQRankSum=-2.331;DP=41;ExcessHet=3.0103;FS=12.030;MLEAC=1;MLEAF=0.250;MQ=42.89;MQRankSum=-3.050;QD=2.65;ReadPosRankSum=-1.836;SOR=3.793	GT:AD:DP:GQ:PL	0/1:14,6:20:61:61,0,228
Fvb3	20152369	.	A	T	178.91	PASS	AC=1;AF=0.250;AN=4;BaseQRankSum=-3.737;DP=44;ExcessHet=3.0103;FS=8.941;MLEAC=1;MLEAF=0.250;MQ=60.00;MQRankSum=0.000;QD=8.95;ReadPosRankSum=-2.883;SOR=0.758	GT:AD:DP:GQ:PL	0/1:10,10:20:99:187,0,187
Fvb3	23459661	.	T	G	231.57	PASS	AC=2;AF=0.500;AN=4;BaseQRankSum=-4.480;DP=25;ExcessHet=0.7918;FS=1.569;MLEAC=2;MLEAF=0.500;MQ=32.13;MQRankSum=-4.607;QD=23.16;ReadPosRankSum=2.165;SOR=0.399	GT:AD:DP:GQ:PL	1/1:0,10:10:30:247,30,0
Fvb3	24319094	.	C	T	85.91	PASS	AC=1;AF=0.250;AN=4;BaseQRankSum=-2.210;DP=39;ExcessHet=3.0103;FS=1.677;MLEAC=1;MLEAF=0.250;MQ=60.00;MQRankSum=0.000;QD=4.77;ReadPosRankSum=1.630;SOR=1.075	GT:AD:DP:GQ:PL	0/1:12,6:18:94:94,0,243
Fvb3	26356296	.	A	G	491.48	PASS	AC=1;AF=0.250;AN=4;BaseQRankSum=-4.303;DP=84;ExcessHet=3.0103;FS=8.115;MLEAC=1;MLEAF=0.250;MQ=40.50;MQRankSum=-6.224;QD=10.24;ReadPosRankSum=-0.049;SOR=0.607	GT:AD:DP:GQ:PL	0/1:22,26:48:99:499,0,400
Fvb3	26356385	.	C	T	430.05	PASS	AC=1;AF=0.250;AN=4;BaseQRankSum=-2.827;DP=96;ExcessHet=3.0103;FS=15.771;MLEAC=1;MLEAF=0.250;MQ=46.57;MQRankSum=-8.180;QD=8.27;ReadPosRankSum=-0.345;SOR=0.970	GT:AD:DP:GQ:PL	0/1:28,24:52:99:438,0,537
Fvb3	26747386	.	G	A	79.91	PASS	AC=1;AF=0.250;AN=4;BaseQRankSum=-2.223;DP=42;ExcessHet=3.0103;FS=1.724;MLEAC=1;MLEAF=0.250;MQ=50.55;MQRankSum=-2.193;QD=4.00;ReadPosRankSum=-2.224;SOR=1.162	GT:AD:DP:GQ:PL	0/1:14,6:20:88:88,0,286
Fvb3	29708875	.	A	C	126.91	PASS	AC=1;AF=0.250;AN=4;BaseQRankSum=-2.172;DP=50;ExcessHet=3.0103;FS=38.472;MLEAC=1;MLEAF=0.250;MQ=55.77;MQRankSum=-2.888;QD=4.53;ReadPosRankSum=-0.042;SOR=4.798	GT:AD:DP:GQ:PL	0/1:18,10:28:99:135,0,303
Fvb3	32821401	.	T	G	162.91	PASS	AC=1;AF=0.250;AN=4;BaseQRankSum=-4.486;DP=63;ExcessHet=3.0103;FS=59.250;MLEAC=1;MLEAF=0.250;MQ=60.00;MQRankSum=0.000;QD=3.54;ReadPosRankSum=-0.107;SOR=6.357	GT:AD:DP:GQ:PL	0/1:24,22:46:99:171,0,433
Fvb4	1576720	.	C	T	115.91	PASS	AC=1;AF=0.250;AN=4;BaseQRankSum=-2.302;DP=39;ExcessHet=3.0103;FS=24.847;MLEAC=1;MLEAF=0.250;MQ=60.00;MQRankSum=0.000;QD=5.80;ReadPosRankSum=-1.168;SOR=4.400	GT:AD:DP:GQ:PL	0/1:12,8:20:99:124,0,291
Fvb4	5980118	.	A	G	66.91	PASS	AC=1;AF=0.250;AN=4;BaseQRankSum=-2.453;DP=21;ExcessHet=3.0103;FS=10.985;MLEAC=1;MLEAF=0.250;MQ=41.57;MQRankSum=-3.039;QD=8.36;ReadPosRankSum=-1.570;SOR=0.014	GT:AD:DP:GQ:PL	0/1:4,4:8:75:75,0,75
Fvb4	7105272	.	G	T	51.91	PASS	AC=1;AF=0.250;AN=4;BaseQRankSum=-2.528;DP=48;ExcessHet=3.0103;FS=16.123;MLEAC=1;MLEAF=0.250;MQ=59.03;MQRankSum=-3.458;QD=2.60;ReadPosRankSum=-2.249;SOR=3.908	GT:AD:DP:GQ:PL	0/1:14,6:20:60:60,0,258
Fvb4	7520346	.	T	G	45.92	PASS	AC=1;AF=0.250;AN=4;BaseQRankSum=-2.641;DP=21;ExcessHet=3.0103;FS=11.461;MLEAC=1;MLEAF=0.250;MQ=60.00;MQRankSum=0.000;QD=3.83;ReadPosRankSum=-0.664;SOR=0.011	GT:AD:DP:GQ:PL	0/1:6,6:12:54:54,0,85
Fvb4	10890992	.	T	G	147.91	PASS	AC=1;AF=0.250;AN=4;BaseQRankSum=-4.293;DP=41;ExcessHet=3.0103;FS=29.591;MLEAC=1;MLEAF=0.250;MQ=47.10;MQRankSum=-3.396;QD=6.16;ReadPosRankSum=2.160;SOR=5.420	GT:AD:DP:GQ:PL	0/1:10,14:24:99:156,0,179
Fvb4	11873253	.	A	G	211.92	PASS	AC=1;AF=0.250;AN=4;BaseQRankSum=-1.832;DP=198;ExcessHet=3.0103;FS=4.581;MLEAC=1;MLEAF=0.250;MQ=56.23;MQRankSum=0.000;QD=5.05;ReadPosRankSum=-5.485;SOR=0.741	GT:AD:DP:GQ:PL	0/1:28,14:42:99:220,0,567
Fvb4	13562117	.	G	A	117.91	PASS	AC=1;AF=0.250;AN=4;BaseQRankSum=-2.096;DP=39;ExcessHet=3.0103;FS=31.480;MLEAC=1;MLEAF=0.250;MQ=60.00;MQRankSum=0.000;QD=4.91;ReadPosRankSum=-0.993;SOR=4.398	GT:AD:DP:GQ:PL	0/1:16,8:24:99:126,0,323
Fvb4	13861820	.	A	C	60.91	PASS	AC=1;AF=0.250;AN=4;BaseQRankSum=-3.281;DP=57;ExcessHet=3.0103;FS=13.944;MLEAC=1;MLEAF=0.250;MQ=60.00;MQRankSum=0.000;QD=2.54;ReadPosRankSum=-2.673;SOR=3.645	GT:AD:DP:GQ:PL	0/1:16,8:24:69:69,0,266
Fvb4	15807129	.	C	G	147.91	PASS	AC=1;AF=0.250;AN=4;BaseQRankSum=-0.876;DP=26;ExcessHet=3.0103;FS=36.819;MLEAC=1;MLEAF=0.250;MQ=60.00;MQRankSum=0.000;QD=12.33;ReadPosRankSum=1.641;SOR=3.892	GT:AD:DP:GQ:PL	0/1:6,6:12:99:156,0,112
Fvb4	18557426	.	A	C	87.91	PASS	AC=1;AF=0.250;AN=4;BaseQRankSum=-3.137;DP=60;ExcessHet=3.0103;FS=38.146;MLEAC=1;MLEAF=0.250;MQ=60.00;MQRankSum=0.000;QD=2.31;ReadPosRankSum=0.725;SOR=5.133	GT:AD:DP:GQ:PL	0/1:26,12:38:96:96,0,473
Fvb4	19079892	.	A	C	89.91	PASS	AC=1;AF=0.250;AN=4;BaseQRankSum=-2.015;DP=43;ExcessHet=3.0103;FS=24.427;MLEAC=1;MLEAF=0.250;MQ=59.49;MQRankSum=-1.518;QD=3.75;ReadPosRankSum=2.233;SOR=4.400	GT:AD:DP:GQ:PL	0/1:16,8:24:98:98,0,236
Fvb4	21904826	.	G	T	98.91	PASS	AC=1;AF=0.250;AN=4;BaseQRankSum=-4.125;DP=55;ExcessHet=3.0103;FS=31.318;MLEAC=1;MLEAF=0.250;MQ=60.00;MQRankSum=0.000;QD=4.12;ReadPosRankSum=0.250;SOR=5.135	GT:AD:DP:GQ:PL	0/1:12,12:24:99:107,0,228
Fvb4	22074181	.	C	A	151.19	PASS	AC=1;AF=0.250;AN=4;BaseQRankSum=-2.642;DP=39;ExcessHet=3.0103;FS=0.000;MLEAC=1;MLEAF=0.250;MQ=60.00;MQRankSum=0.000;QD=7.56;ReadPosRankSum=0.320;SOR=0.941	GT:AD:DP:GQ:PL	0/1:10,10:20:99:159,0,159
Fvb4	24572622	.	A	C	58.91	PASS	AC=1;AF=0.250;AN=4;BaseQRankSum=-2.045;DP=47;ExcessHet=3.0103;FS=16.300;MLEAC=1;MLEAF=0.250;MQ=60.00;MQRankSum=0.000;QD=3.27;ReadPosRankSum=1.930;SOR=3.907	GT:AD:DP:GQ:PL	0/1:12,6:18:67:67,0,185
Fvb4	31953140	.	G	A	554.91	PASS	AC=1;AF=0.250;AN=4;BaseQRankSum=-1.885;DP=71;ExcessHet=3.0103;FS=13.458;MLEAC=1;MLEAF=0.250;MQ=56.63;MQRankSum=-6.980;QD=10.67;ReadPosRankSum=-1.899;SOR=1.997	GT:AD:DP:GQ:PL	0/1:36,16:52:99:563,0,1463
Fvb4	32600352	.	T	C	328.91	PASS	AC=1;AF=0.250;AN=4;BaseQRankSum=-3.404;DP=204;ExcessHet=3.0103;FS=1.105;MLEAC=1;MLEAF=0.250;MQ=59.97;MQRankSum=0.000;QD=9.14;ReadPosRankSum=-5.508;SOR=0.874	GT:AD:DP:GQ:PL	0/1:18,18:36:99:337,0,337
Fvb5	2241559	.	A	C	31.92	PASS	AC=1;AF=0.250;AN=4;BaseQRankSum=-1.807;DP=20;ExcessHet=3.0103;FS=0.000;MLEAC=1;MLEAF=0.250;MQ=60.00;MQRankSum=0.000;QD=3.19;ReadPosRankSum=1.563;SOR=0.083	GT:AD:DP:GQ:PL	0/1:6,4:10:40:40,0,90
Fvb5	5444393	.	T	G	82.91	PASS	AC=1;AF=0.250;AN=4;BaseQRankSum=-3.470;DP=47;ExcessHet=3.0103;FS=26.071;MLEAC=1;MLEAF=0.250;MQ=58.61;MQRankSum=-3.885;QD=5.18;ReadPosRankSum=-2.003;SOR=4.611	GT:AD:DP:GQ:PL	0/1:8,8:16:91:91,0,152
Fvb5	5590147	.	A	C	88.91	PASS	AC=1;AF=0.250;AN=4;BaseQRankSum=-2.212;DP=50;ExcessHet=3.0103;FS=33.456;MLEAC=1;MLEAF=0.250;MQ=60.00;MQRankSum=0.000;QD=3.70;ReadPosRankSum=-0.501;SOR=4.397	GT:AD:DP:GQ:PL	0/1:16,8:24:97:97,0,295
Fvb5	8742308	.	T	G	71.92	PASS	AC=1;AF=0.250;AN=4;BaseQRankSum=-1.336;DP=49;ExcessHet=3.0103;FS=20.936;MLEAC=1;MLEAF=0.250;MQ=60.00;MQRankSum=0.000;QD=3.60;ReadPosRankSum=-0.434;SOR=4.514	GT:AD:DP:GQ:PL	0/1:12,8:20:80:80,0,209
Fvb5	10911259	.	T	G	100.91	PASS	AC=1;AF=0.250;AN=4;BaseQRankSum=-3.213;DP=56;ExcessHet=3.0103;FS=49.992;MLEAC=1;MLEAF=0.250;MQ=55.96;MQRankSum=-1.521;QD=2.97;ReadPosRankSum=-0.898;SOR=5.547	GT:AD:DP:GQ:PL	0/1:22,12:34:99:109,0,396
Fvb5	11250813	.	A	C	57.91	PASS	AC=1;AF=0.250;AN=4;BaseQRankSum=-2.436;DP=43;ExcessHet=3.0103;FS=11.735;MLEAC=1;MLEAF=0.250;MQ=60.00;MQRankSum=0.000;QD=3.22;ReadPosRankSum=-2.357;SOR=3.500	GT:AD:DP:GQ:PL	0/1:12,6:18:66:66,0,214
Fvb5	14437358	.	A	C	74.91	PASS	AC=1;AF=0.250;AN=4;BaseQRankSum=-2.090;DP=47;ExcessHet=3.0103;FS=32.798;MLEAC=1;MLEAF=0.250;MQ=60.00;MQRankSum=0.000;QD=2.88;ReadPosRankSum=3.299;SOR=4.799	GT:AD:DP:GQ:PL	0/1:16,10:26:83:83,0,232
Fvb5	15567696	.	T	G	31.91	PASS	AC=1;AF=0.250;AN=4;BaseQRankSum=-1.946;DP=30;ExcessHet=3.0103;FS=2.576;MLEAC=1;MLEAF=0.250;MQ=51.18;MQRankSum=-3.451;QD=3.19;ReadPosRankSum=-1.331;SOR=1.773	GT:AD:DP:GQ:PL	0/1:6,4:10:40:40,0,90
Fvb5	16853742	.	T	G	97.91	PASS	AC=1;AF=0.250;AN=4;BaseQRankSum=-2.815;DP=43;ExcessHet=3.0103;FS=33.693;MLEAC=1;MLEAF=0.250;MQ=57.53;MQRankSum=1.468;QD=3.06;ReadPosRankSum=3.205;SOR=5.419	GT:AD:DP:GQ:PL	0/1:18,14:32:99:106,0,236
Fvb5	16947580	.	T	C	240.91	PASS	AC=1;AF=0.250;AN=4;BaseQRankSum=-3.433;DP=151;ExcessHet=3.0103;FS=1.185;MLEAC=1;MLEAF=0.250;MQ=60.00;MQRankSum=0.000;QD=7.53;ReadPosRankSum=-5.559;SOR=0.976	GT:AD:DP:GQ:PL	0/1:18,14:32:99:249,0,349
Fvb5	17907554	.	A	G	217.96	PASS	AC=1;AF=0.250;AN=4;BaseQRankSum=-1.934;DP=59;ExcessHet=3.0103;FS=0.000;MLEAC=1;MLEAF=0.250;MQ=52.84;MQRankSum=-6.534;QD=5.45;ReadPosRankSum=3.452;SOR=0.538	GT:AD:DP:GQ:PL	0/1:26,14:40:99:226,0,523
Fvb5	24639674	.	A	C	54.91	PASS	AC=1;AF=0.250;AN=4;BaseQRankSum=-2.284;DP=43;ExcessHet=3.0103;FS=29.717;MLEAC=1;MLEAF=0.250;MQ=60.00;MQRankSum=0.000;QD=2.11;ReadPosRankSum=1.684;SOR=4.398	GT:AD:DP:GQ:PL	0/1:18,8:26:63:63,0,310
Fvb5	24768340	.	T	G	42.36	PASS	AC=1;AF=0.250;AN=4;BaseQRankSum=-2.645;DP=43;ExcessHet=3.0103;FS=45.346;MLEAC=1;MLEAF=0.250;MQ=42.24;MQRankSum=-2.762;QD=2.12;ReadPosRankSum=-1.491;SOR=4.971	GT:AD:DP:GQ:PL	0/1:12,8:20:50:50,0,210
Fvb5	25992300	.	T	G	75.91	PASS	AC=1;AF=0.250;AN=4;BaseQRankSum=-3.804;DP=51;ExcessHet=3.0103;FS=39.233;MLEAC=1;MLEAF=0.250;MQ=60.00;MQRankSum=0.000;QD=2.37;ReadPosRankSum=1.245;SOR=5.132	GT:AD:DP:GQ:PL	0/1:20,12:32:84:84,0,373
Fvb5	26687479	.	C	T	103.92	PASS	AC=1;AF=0.250;AN=4;BaseQRankSum=-2.380;DP=36;ExcessHet=3.0103;FS=0.000;MLEAC=1;MLEAF=0.250;MQ=34.86;MQRankSum=-4.008;QD=8.66;ReadPosRankSum=0.286;SOR=0.562	GT:AD:DP:GQ:PL	0/1:6,6:12:99:112,0,112
Fvb5	26810495	.	T	G	93.91	PASS	AC=1;AF=0.250;AN=4;BaseQRankSum=-3.545;DP=46;ExcessHet=3.0103;FS=50.855;MLEAC=1;MLEAF=0.250;MQ=60.00;MQRankSum=0.000;QD=3.61;ReadPosRankSum=1.531;SOR=5.131	GT:AD:DP:GQ:PL	0/1:14,12:26:99:102,0,213
Fvb5	28355827	.	T	G	60.91	PASS	AC=1;AF=0.250;AN=4;BaseQRankSum=-2.545;DP=50;ExcessHet=3.0103;FS=28.071;MLEAC=1;MLEAF=0.250;MQ=60.00;MQRankSum=0.000;QD=2.54;ReadPosRankSum=2.027;SOR=4.399	GT:AD:DP:GQ:PL	0/1:16,8:24:69:69,0,266
Fvb6	2700375	.	T	C	170.91	PASS	AC=1;AF=0.250;AN=4;BaseQRankSum=-4.093;DP=91;ExcessHet=3.0103;FS=14.718;MLEAC=1;MLEAF=0.250;MQ=53.16;MQRankSum=-5.854;QD=3.35;ReadPosRankSum=-2.614;SOR=2.409	GT:AD:DP:GQ:PL	0/1:34,17:51:99:179,0,691
Fvb6	3154511	.	C	T	120.91	PASS	AC=1;AF=0.250;AN=4;BaseQRankSum=-2.000;DP=48;ExcessHet=3.0103;FS=22.161;MLEAC=1;MLEAF=0.250;MQ=60.00;MQRankSum=0.000;QD=6.05;ReadPosRankSum=1.295;SOR=3.900	GT:AD:DP:GQ:PL	0/1:14,6:20:99:129,0,286
Fvb6	5297392	.	T	G	132.91	PASS	AC=1;AF=0.250;AN=4;BaseQRankSum=-2.183;DP=48;ExcessHet=3.0103;FS=42.230;MLEAC=1;MLEAF=0.250;MQ=60.00;MQRankSum=0.000;QD=5.11;ReadPosRankSum=-1.523;SOR=4.972	GT:AD:DP:GQ:PL	0/1:16,10:26:99:141,0,289
Fvb6	5616605	.	T	G	63.91	PASS	AC=1;AF=0.250;AN=4;BaseQRankSum=-2.465;DP=53;ExcessHet=3.0103;FS=24.425;MLEAC=1;MLEAF=0.250;MQ=59.93;MQRankSum=-3.692;QD=3.99;ReadPosRankSum=-0.718;SOR=3.898	GT:AD:DP:GQ:PL	0/1:10,6:16:72:72,0,171
Fvb6	7892605	.	A	C	66.91	PASS	AC=1;AF=0.250;AN=4;BaseQRankSum=-2.154;DP=30;ExcessHet=3.0103;FS=10.017;MLEAC=1;MLEAF=0.250;MQ=44.20;MQRankSum=-2.912;QD=8.36;ReadPosRankSum=-1.932;SOR=3.244	GT:AD:DP:GQ:PL	0/1:4,4:8:74:75,0,74
Fvb6	10394081	.	A	C	60.92	PASS	AC=1;AF=0.250;AN=4;BaseQRankSum=-1.047;DP=20;ExcessHet=3.0103;FS=10.620;MLEAC=1;MLEAF=0.250;MQ=45.03;MQRankSum=-3.081;QD=6.09;ReadPosRankSum=2.866;SOR=3.238	GT:AD:DP:GQ:PL	0/1:6,4:10:69:69,0,118
Fvb6	11158703	.	T	G	98.92	PASS	AC=1;AF=0.250;AN=4;BaseQRankSum=-2.804;DP=35;ExcessHet=3.0103;FS=19.737;MLEAC=1;MLEAF=0.250;MQ=60.00;MQRankSum=0.000;QD=5.50;ReadPosRankSum=-0.216;SOR=4.788	GT:AD:DP:GQ:PL	0/1:8,10:18:88:107,0,88
Fvb6	13744742	.	A	G	97.91	PASS	AC=1;AF=0.250;AN=4;BaseQRankSum=-2.413;DP=38;ExcessHet=3.0103;FS=0.000;MLEAC=1;MLEAF=0.250;MQ=52.73;MQRankSum=-3.548;QD=6.99;ReadPosRankSum=-2.463;SOR=0.602	GT:AD:DP:GQ:PL	0/1:8,6:14:99:106,0,156
Fvb6	14878016	.	A	C	68.91	PASS	AC=1;AF=0.250;AN=4;BaseQRankSum=-1.878;DP=59;ExcessHet=3.0103;FS=32.570;MLEAC=1;MLEAF=0.250;MQ=59.97;MQRankSum=-2.793;QD=2.46;ReadPosRankSum=1.414;SOR=5.134	GT:AD:DP:GQ:PL	0/1:18,10:28:77:77,0,305
Fvb6	15047153	.	T	A	178.91	PASS	AC=1;AF=0.250;AN=4;BaseQRankSum=-3.727;DP=52;ExcessHet=3.0103;FS=8.113;MLEAC=1;MLEAF=0.250;MQ=60.00;MQRankSum=0.000;QD=8.95;ReadPosRankSum=0.456;SOR=2.211	GT:AD:DP:GQ:PL	0/1:10,10:20:99:187,0,187
Fvb6	20755538	.	C	G	30.92	PASS	AC=1;AF=0.250;AN=4;BaseQRankSum=-1.172;DP=31;ExcessHet=3.0103;FS=23.315;MLEAC=1;MLEAF=0.250;MQ=60.00;MQRankSum=0.000;QD=3.09;ReadPosRankSum=-0.618;SOR=3.588	GT:AD:DP:GQ:PL	0/1:6,4:10:39:39,0,119
Fvb6	20846880	.	T	G	34.91	PASS	AC=1;AF=0.250;AN=4;BaseQRankSum=-2.627;DP=40;ExcessHet=3.0103;FS=24.797;MLEAC=1;MLEAF=0.250;MQ=60.00;MQRankSum=0.000;QD=2.18;ReadPosRankSum=-2.393;SOR=3.896	GT:AD:DP:GQ:PL	0/1:10,6:16:43:43,0,142
Fvb6	21220802	.	A	C	32.91	PASS	AC=1;AF=0.250;AN=4;BaseQRankSum=-2.895;DP=35;ExcessHet=3.0103;FS=25.388;MLEAC=1;MLEAF=0.250;MQ=45.09;MQRankSum=-2.149;QD=2.06;ReadPosRankSum=1.675;SOR=4.399	GT:AD:DP:GQ:PL	0/1:10,6:16:41:41,0,201
Fvb6	22342674	.	T	G	75.91	PASS	AC=1;AF=0.250;AN=4;BaseQRankSum=-4.511;DP=43;ExcessHet=3.0103;FS=39.912;MLEAC=1;MLEAF=0.250;MQ=52.13;MQRankSum=-2.591;QD=3.45;ReadPosRankSum=-2.795;SOR=5.280	GT:AD:DP:GQ:PL	0/1:10,12:22:84:84,0,156
Fvb6	31153528	.	T	G	60.92	PASS	AC=1;AF=0.250;AN=4;BaseQRankSum=-2.260;DP=29;ExcessHet=3.0103;FS=24.566;MLEAC=1;MLEAF=0.250;MQ=56.38;MQRankSum=-2.851;QD=4.35;ReadPosRankSum=1.217;SOR=4.800	GT:AD:DP:GQ:PL	0/1:6,8:14:50:69,0,50
Fvb6	32038884	.	A	C	60.95	PASS	AC=1;AF=0.250;AN=4;BaseQRankSum=-1.362;DP=21;ExcessHet=3.0103;FS=14.880;MLEAC=1;MLEAF=0.250;MQ=60.00;MQRankSum=0.000;QD=6.09;ReadPosRankSum=1.911;SOR=3.593	GT:AD:DP:GQ:PL	0/1:6,4:10:69:69,0,118
Fvb6	34165957	.	C	T	155.91	PASS	AC=1;AF=0.250;AN=4;BaseQRankSum=-2.249;DP=52;ExcessHet=3.0103;FS=14.397;MLEAC=1;MLEAF=0.250;MQ=60.00;MQRankSum=0.000;QD=5.57;ReadPosRankSum=2.407;SOR=2.250	GT:AD:DP:GQ:PL	0/1:18,10:28:99:164,0,332
Fvb6	37069818	.	A	C	53.91	PASS	AC=1;AF=0.250;AN=4;BaseQRankSum=-3.673;DP=40;ExcessHet=3.0103;FS=13.634;MLEAC=1;MLEAF=0.250;MQ=60.00;MQRankSum=0.000;QD=3.37;ReadPosRankSum=1.005;SOR=3.516	GT:AD:DP:GQ:PL	0/1:8,8:16:62:62,0,123
Fvb7	727793	.	T	G	79.91	PASS	AC=1;AF=0.250;AN=4;BaseQRankSum=-3.813;DP=50;ExcessHet=3.0103;FS=36.931;MLEAC=1;MLEAF=0.250;MQ=58.49;MQRankSum=-2.029;QD=3.33;ReadPosRankSum=-0.915;SOR=4.798	GT:AD:DP:GQ:PL	0/1:14,10:24:88:88,0,247
Fvb7	5346961	.	C	G	286.91	PASS	AC=1;AF=0.250;AN=4;BaseQRankSum=-3.421;DP=170;ExcessHet=3.0103;FS=8.751;MLEAC=1;MLEAF=0.250;MQ=41.02;MQRankSum=-6.406;QD=9.26;ReadPosRankSum=-0.406;SOR=0.864	GT:AD:DP:GQ:PL	0/1:16,15:31:99:295,0,303
Fvb7	9402643	.	A	C	140.91	PASS	AC=1;AF=0.250;AN=4;BaseQRankSum=-1.819;DP=46;ExcessHet=3.0103;FS=38.502;MLEAC=1;MLEAF=0.250;MQ=59.21;MQRankSum=-2.372;QD=4.70;ReadPosRankSum=1.064;SOR=5.132	GT:AD:DP:GQ:PL	0/1:18,12:30:99:149,0,327
Fvb7	12066119	.	T	G	110.91	PASS	AC=1;AF=0.250;AN=4;BaseQRankSum=-3.761;DP=55;ExcessHet=3.0103;FS=33.202;MLEAC=1;MLEAF=0.250;MQ=60.00;MQRankSum=0.000;QD=3.70;ReadPosRankSum=-0.281;SOR=5.133	GT:AD:DP:GQ:PL	0/1:18,12:30:99:119,0,328
Fvb7	13962358	.	A	C	89.91	PASS	AC=1;AF=0.250;AN=4;BaseQRankSum=-4.530;DP=54;ExcessHet=3.0103;FS=27.788;MLEAC=1;MLEAF=0.250;MQ=60.00;MQRankSum=0.000;QD=2.64;ReadPosRankSum=0.068;SOR=4.043	GT:AD:DP:GQ:PL	0/1:20,14:34:98:98,0,368
Fvb7	16492912	.	T	G	64.91	PASS	AC=1;AF=0.250;AN=4;BaseQRankSum=-3.885;DP=56;ExcessHet=3.0103;FS=37.122;MLEAC=1;MLEAF=0.250;MQ=60.00;MQRankSum=0.000;QD=2.50;ReadPosRankSum=0.443;SOR=5.419	GT:AD:DP:GQ:PL	0/1:14,12:26:73:73,0,214
Fvb7	19438279	.	T	G	69.91	PASS	AC=1;AF=0.250;AN=4;BaseQRankSum=-1.893;DP=41;ExcessHet=3.0103;FS=16.827;MLEAC=1;MLEAF=0.250;MQ=60.00;MQRankSum=0.000;QD=4.99;ReadPosRankSum=0.100;SOR=3.904	GT:AD:DP:GQ:PL	0/1:8,6:14:78:78,0,127
Fvb7	21722606	.	G	A	54.92	PASS	AC=1;AF=0.250;AN=4;BaseQRankSum=-1.151;DP=22;ExcessHet=3.0103;FS=0.000;MLEAC=1;MLEAF=0.250;MQ=51.69;MQRankSum=-3.342;QD=4.58;ReadPosRankSum=-0.214;SOR=0.368	GT:AD:DP:GQ:PL	0/1:8,4:12:63:63,0,162
Fvb7	23592620	.	C	A	199.91	PASS	AC=1;AF=0.250;AN=4;BaseQRankSum=-2.106;DP=62;ExcessHet=3.0103;FS=1.186;MLEAC=1;MLEAF=0.250;MQ=60.00;MQRankSum=0.000;QD=4.35;ReadPosRankSum=1.041;SOR=0.916	GT:AD:DP:GQ:PL	0/1:32,14:46:99:208,0,653
Fvb1	5927050	.	T	TA	317.96	PASS	AC=1;AF=0.250;AN=4;BaseQRankSum=-2.442;DP=68;ExcessHet=3.0103;FS=0.000;MLEAC=1;MLEAF=0.250;MQ=45.97;MQRankSum=-2.243;QD=8.83;ReadPosRankSum=-3.618;SOR=0.831	GT:AD:DP:GQ:PL	0/1:22,14:36:99:326,0,632
Fvb1	6346283	.	T	TG	58.88	PASS	AC=1;AF=0.250;AN=4;BaseQRankSum=-2.627;DP=51;ExcessHet=3.0103;FS=24.250;MLEAC=1;MLEAF=0.250;MQ=60.00;MQRankSum=0.000;QD=2.45;ReadPosRankSum=0.421;SOR=4.400	GT:AD:DP:GQ:PL	0/1:16,8:24:67:67,0,442
Fvb2	7463241	.	GT	G	38.88	PASS	AC=1;AF=0.250;AN=4;BaseQRankSum=-1.882;DP=19;ExcessHet=3.0103;FS=3.039;MLEAC=1;MLEAF=0.250;MQ=45.58;MQRankSum=-2.218;QD=6.48;ReadPosRankSum=0.211;SOR=1.911	GT:AD:DP:GQ:PL	0/1:4,2:6:47:47,0,112
Fvb2	27404037	.	T	TCATGTAC	766.29	PASS	AC=1;AF=0.250;AN=4;BaseQRankSum=-1.974;DP=93;ExcessHet=3.0103;FS=3.306;MLEAC=1;MLEAF=0.250;MQ=53.04;MQRankSum=-8.895;QD=10.64;ReadPosRankSum=2.880;SOR=0.387	GT:AD:DP:GQ:PL	0/1:50,22:72:99:773,0,2033
Fvb3	20119691	.	T	TC	548.88	PASS	AC=1;AF=0.250;AN=4;BaseQRankSum=-4.677;DP=517;ExcessHet=3.0103;FS=2.612;MLEAC=1;MLEAF=0.250;MQ=56.06;MQRankSum=-6.504;QD=22.87;ReadPosRankSum=3.840;SOR=0.384	GT:AD:DP:GQ:PL	0/1:8,16:24:99:557,0,243
Fvb4	11360780	.	AC	A	63.89	PASS	AC=1;AF=0.250;AN=4;BaseQRankSum=-1.360;DP=13;ExcessHet=3.0103;FS=0.000;MLEAC=1;MLEAF=0.250;MQ=53.70;MQRankSum=-1.574;QD=10.65;ReadPosRankSum=-0.757;SOR=0.061	GT:AD:DP:GQ:PL	0/1:4,2:6:72:72,0,162
Fvb4	12993247	.	AT	A	35.88	PASS	AC=1;AF=0.250;AN=4;BaseQRankSum=-1.285;DP=19;ExcessHet=3.0103;FS=0.000;MLEAC=1;MLEAF=0.250;MQ=39.23;MQRankSum=-0.239;QD=5.98;ReadPosRankSum=1.034;SOR=1.445	GT:AD:DP:GQ:PL	0/1:4,2:6:44:44,0,106
Fvb4	31953139	.	C	CAA	554.88	PASS	AC=1;AF=0.250;AN=4;BaseQRankSum=-2.581;DP=72;ExcessHet=3.0103;FS=13.458;MLEAC=1;MLEAF=0.250;MQ=56.68;MQRankSum=-7.033;QD=10.67;ReadPosRankSum=-1.430;SOR=1.993	GT:AD:DP:GQ:PL	0/1:36,16:52:99:563,0,1463
Fvb5	14970724	.	AT	A	513.88	PASS	AC=1;AF=0.250;AN=4;BaseQRankSum=-3.608;DP=145;ExcessHet=3.0103;FS=8.035;MLEAC=1;MLEAF=0.250;MQ=41.67;MQRankSum=-4.714;QD=11.17;ReadPosRankSum=-5.569;SOR=1.890	GT:AD:DP:GQ:PL	0/1:30,16:46:99:522,0,1212
Fvb5	15914259	.	TGAGG	T	1274.88	PASS	AC=1;AF=0.250;AN=4;BaseQRankSum=-7.523;DP=420;ExcessHet=3.0103;FS=9.757;MLEAC=1;MLEAF=0.250;MQ=49.05;MQRankSum=7.487;QD=15.55;ReadPosRankSum=9.912;SOR=0.301	GT:AD:DP:GQ:PL	0/1:48,34:82:99:1283,0,1666
Fvb6	10764083	.	A	ATTTTCAAT	661.88	PASS	AC=1;AF=0.250;AN=4;BaseQRankSum=-3.929;DP=99;ExcessHet=3.0103;FS=3.784;MLEAC=1;MLEAF=0.250;MQ=54.54;MQRankSum=-6.240;QD=14.39;ReadPosRankSum=0.693;SOR=0.701	GT:AD:DP:GQ:PL	0/1:28,18:46:99:670,0,1123
Fvb7	3595118	.	T	TA	1080.88	PASS	AC=1;AF=0.250;AN=4;BaseQRankSum=-10.843;DP=596;ExcessHet=3.0103;FS=64.384;MLEAC=1;MLEAF=0.250;MQ=46.41;MQRankSum=10.606;QD=16.89;ReadPosRankSum=7.001;SOR=0.584	GT:AD:DP:GQ:PL	0/1:28,36:64:99:1089,0,830
Fvb7	14820926	.	AC	A	44.88	PASS	AC=1;AF=0.250;AN=4;BaseQRankSum=-2.172;DP=23;ExcessHet=3.0103;FS=3.183;MLEAC=1;MLEAF=0.250;MQ=57.43;MQRankSum=1.045;QD=7.48;ReadPosRankSum=0.057;SOR=2.303	GT:AD:DP:GQ:PL	0/1:4,2:6:53:53,0,124

## Sheet: LS_rep3
CHROM	POS	ID	REF	ALT	QUAL	FILTER	INFO	FORMAT	LS_rep3
Fvb1	7486625	.	A	T	329.91	PASS	AC=1;AF=0.250;AN=4;BaseQRankSum=1.751;DP=90;ExcessHet=3.0103;FS=45.120;MLEAC=1;MLEAF=0.250;MQ=46.86;MQRankSum=-7.354;QD=8.92;ReadPosRankSum=3.863;SOR=5.783	GT:AD:DP:GQ:PL	0/1:20,17:37:99:338,0,630
Fvb1	7486697	.	A	C	312.91	PASS	AC=1;AF=0.250;AN=4;BaseQRankSum=-0.899;DP=92;ExcessHet=3.0103;FS=42.240;MLEAC=1;MLEAF=0.250;MQ=46.59;MQRankSum=-6.232;QD=6.26;ReadPosRankSum=-2.671;SOR=5.869	GT:AD:DP:GQ:PL	0/1:31,19:50:99:321,0,683
Fvb1	9377714	.	G	A	160.91	PASS	AC=1;AF=0.250;AN=4;BaseQRankSum=-0.709;DP=42;ExcessHet=3.0103;FS=0.000;MLEAC=1;MLEAF=0.250;MQ=58.67;MQRankSum=1.094;QD=8.47;ReadPosRankSum=-0.324;SOR=0.425	GT:AD:DP:GQ:PL	0/1:13,6:19:99:169,0,485
Fvb1	21975324	.	C	T	42.34	PASS	AC=1;AF=0.250;AN=4;BaseQRankSum=0.589;DP=23;ExcessHet=3.0103;FS=9.328;MLEAC=1;MLEAF=0.250;MQ=34.58;MQRankSum=-2.574;QD=4.23;ReadPosRankSum=0.469;SOR=1.431	GT:AD:DP:GQ:PL	0/1:7,3:10:49:49,0,220
Fvb2	4005420	.	G	A	219.91	PASS	AC=1;AF=0.250;AN=4;BaseQRankSum=-2.953;DP=44;ExcessHet=3.0103;FS=0.000;MLEAC=1;MLEAF=0.250;MQ=60.00;MQRankSum=0.000;QD=10.47;ReadPosRankSum=1.543;SOR=0.512	GT:AD:DP:GQ:PL	0/1:12,9:21:99:228,0,438
Fvb2	10061389	.	G	A	33.92	PASS	AC=1;AF=0.250;AN=4;BaseQRankSum=1.625;DP=22;ExcessHet=3.0103;FS=2.754;MLEAC=1;MLEAF=0.250;MQ=59.24;MQRankSum=0.625;QD=3.39;ReadPosRankSum=-2.981;SOR=1.981	GT:AD:DP:GQ:PL	0/1:7,3:10:42:42,0,164
Fvb3	6189462	.	T	C	338.91	PASS	AC=1;AF=0.250;AN=4;BaseQRankSum=-0.990;DP=56;ExcessHet=3.0103;FS=13.691;MLEAC=1;MLEAF=0.250;MQ=51.70;MQRankSum=-5.555;QD=13.04;ReadPosRankSum=2.267;SOR=2.935	GT:AD:DP:GQ:PL	0/1:15,11:26:99:347,0,548
Fvb3	22156668	.	T	C	121.92	PASS	AC=1;AF=0.250;AN=4;BaseQRankSum=1.345;DP=24;ExcessHet=3.0103;FS=5.647;MLEAC=1;MLEAF=0.250;MQ=42.82;MQRankSum=-2.819;QD=8.71;ReadPosRankSum=-0.261;SOR=2.437	GT:AD:DP:GQ:PL	0/1:9,5:14:99:130,0,321
Fvb3	24962675	.	A	C	42.91	PASS	AC=1;AF=0.250;AN=4;BaseQRankSum=-1.091;DP=36;ExcessHet=3.0103;FS=8.748;MLEAC=1;MLEAF=0.250;MQ=57.49;MQRankSum=1.077;QD=4.29;ReadPosRankSum=-0.830;SOR=2.910	GT:AD:DP:GQ:PL	0/1:7,3:10:51:51,0,213
Fvb3	34378444	.	T	C	63.91	PASS	AC=1;AF=0.250;AN=4;BaseQRankSum=0.533;DP=28;ExcessHet=3.0103;FS=34.757;MLEAC=1;MLEAF=0.250;MQ=29.60;MQRankSum=-2.209;QD=4.92;ReadPosRankSum=-0.107;SOR=3.219	GT:AD:DP:GQ:PL	0/1:9,4:13:72:72,0,239
Fvb4	867393	.	C	A	89.04	PASS	AC=1;AF=0.250;AN=4;BaseQRankSum=0.639;DP=26;ExcessHet=3.0103;FS=11.977;MLEAC=1;MLEAF=0.250;MQ=24.50;MQRankSum=-0.284;QD=5.57;ReadPosRankSum=0.000;SOR=3.556	GT:AD:DP:GQ:PL	0/1:11,5:16:96:96,0,272
Fvb4	14864103	.	T	A	70.91	PASS	AC=1;AF=0.250;AN=4;BaseQRankSum=-0.982;DP=24;ExcessHet=3.0103;FS=0.000;MLEAC=1;MLEAF=0.250;MQ=47.31;MQRankSum=0.910;QD=7.88;ReadPosRankSum=0.043;SOR=0.551	GT:AD:DP:GQ:PL	0/1:5,4:9:79:79,0,160
Fvb4	19418571	.	A	C	156.99	PASS	AC=1;AF=0.250;AN=4;BaseQRankSum=0.994;DP=27;ExcessHet=3.0103;FS=20.836;MLEAC=1;MLEAF=0.250;MQ=25.29;MQRankSum=1.209;QD=12.08;ReadPosRankSum=0.717;SOR=4.401	GT:AD:DP:GQ:PL	0/1:6,7:13:99:165,0,142
Fvb4	19932570	.	T	A	376.91	PASS	AC=1;AF=0.250;AN=4;BaseQRankSum=1.120;DP=50;ExcessHet=3.0103;FS=1.300;MLEAC=1;MLEAF=0.250;MQ=60.00;MQRankSum=0.000;QD=15.08;ReadPosRankSum=0.445;SOR=0.943	GT:AD:DP:GQ:PL	0/1:14,11:25:99:385,0,478
Fvb4	28273285	.	C	T	345.91	PASS	AC=1;AF=0.250;AN=4;BaseQRankSum=1.663;DP=46;ExcessHet=3.0103;FS=0.000;MLEAC=1;MLEAF=0.250;MQ=60.00;MQRankSum=0.000;QD=17.30;ReadPosRankSum=0.259;SOR=0.641	GT:AD:DP:GQ:PL	0/1:10,10:20:99:354,0,323
Fvb5	14119406	.	G	C	570.04	PASS	AC=1;AF=0.250;AN=4;BaseQRankSum=0.328;DP=82;ExcessHet=3.0103;FS=22.568;MLEAC=1;MLEAF=0.250;MQ=58.03;MQRankSum=-1.745;QD=11.63;ReadPosRankSum=-1.026;SOR=2.722	GT:AD:DP:GQ:PL	0/1:30,19:49:99:577,0,925
Fvb5	25601177	.	T	C	256.91	PASS	AC=1;AF=0.250;AN=4;BaseQRankSum=0.966;DP=51;ExcessHet=3.0103;FS=0.000;MLEAC=1;MLEAF=0.250;MQ=60.00;MQRankSum=0.000;QD=11.17;ReadPosRankSum=0.212;SOR=0.557	GT:AD:DP:GQ:PL	0/1:15,8:23:99:265,0,557
Fvb6	5311345	.	C	T	268.91	PASS	AC=1;AF=0.250;AN=4;BaseQRankSum=0.761;DP=41;ExcessHet=3.0103;FS=3.546;MLEAC=1;MLEAF=0.250;MQ=60.00;MQRankSum=0.000;QD=14.15;ReadPosRankSum=0.186;SOR=1.055	GT:AD:DP:GQ:PL	0/1:11,8:19:99:277,0,368
Fvb6	10010021	.	T	C	283	PASS	AC=1;AF=0.250;AN=4;BaseQRankSum=-1.490;DP=57;ExcessHet=3.0103;FS=0.000;MLEAC=1;MLEAF=0.250;MQ=60.00;MQRankSum=0.000;QD=12.30;ReadPosRankSum=-3.705;SOR=0.507	GT:AD:DP:GQ:PL	0/1:15,8:23:99:291,0,568
Fvb6	11084795	.	A	C	35.91	PASS	AC=1;AF=0.250;AN=4;BaseQRankSum=-2.463;DP=35;ExcessHet=3.0103;FS=18.042;MLEAC=1;MLEAF=0.250;MQ=60.00;MQRankSum=0.000;QD=2.99;ReadPosRankSum=-0.973;SOR=3.595	GT:AD:DP:GQ:PL	0/1:8,4:12:44:44,0,255
Fvb6	16800714	.	A	T	355.91	PASS	AC=1;AF=0.250;AN=4;BaseQRankSum=-1.069;DP=39;ExcessHet=3.0103;FS=5.498;MLEAC=1;MLEAF=0.250;MQ=40.30;MQRankSum=-1.563;QD=16.18;ReadPosRankSum=1.288;SOR=0.858	GT:AD:DP:GQ:PL	0/1:12,10:22:99:364,0,433
Fvb6	35698983	.	A	T	879.91	PASS	AC=1;AF=0.250;AN=4;BaseQRankSum=1.682;DP=77;ExcessHet=3.0103;FS=49.763;MLEAC=1;MLEAF=0.250;MQ=56.13;MQRankSum=-8.688;QD=17.96;ReadPosRankSum=-0.730;SOR=6.215	GT:AD:DP:GQ:PL	0/1:26,23:49:99:888,0,1016
Fvb7	6731337	.	G	T	284.92	PASS	AC=1;AF=0.250;AN=4;BaseQRankSum=-0.433;DP=34;ExcessHet=3.0103;FS=1.441;MLEAC=1;MLEAF=0.250;MQ=60.00;MQRankSum=0.000;QD=10.96;ReadPosRankSum=-0.208;SOR=0.430	GT:AD:DP:GQ:PL	0/1:16,10:26:99:293,0,495
Fvb7	8304250	.	A	G	95.91	PASS	AC=1;AF=0.250;AN=4;BaseQRankSum=0.448;DP=105;ExcessHet=3.0103;FS=40.102;MLEAC=1;MLEAF=0.250;MQ=44.07;MQRankSum=-4.736;QD=2.09;ReadPosRankSum=1.658;SOR=5.670	GT:AD:DP:GQ:PL	0/1:32,14:46:99:104,0,769
contig_6	13415	.	C	T	72.91	PASS	AC=1;AF=0.250;AN=4;BaseQRankSum=-0.246;DP=25;ExcessHet=3.0103;FS=18.468;MLEAC=1;MLEAF=0.250;MQ=32.26;MQRankSum=-0.642;QD=6.63;ReadPosRankSum=1.745;SOR=3.225	GT:AD:DP:GQ:PL	0/1:7,4:11:81:81,0,178
Fvb1	23265353	.	AAAGTTTAACCGACGAAAAAAATTCGTCGGCTAAAGTGG	A	58.52	PASS	AC=1;AF=0.250;AN=4;BaseQRankSum=0.555;DP=15;ExcessHet=3.0103;FS=6.690;MLEAC=1;MLEAF=0.250;MQ=43.34;MQRankSum=-1.591;QD=9.75;ReadPosRankSum=-0.497;SOR=1.402	GT:AD:DP:GQ:PL	0/1:4,2:6:72:72,0,162
Fvb3	9388770	.	TC	T	57.9	PASS	AC=1;AF=0.250;AN=4;BaseQRankSum=0.875;DP=12;ExcessHet=3.0103;FS=7.404;MLEAC=1;MLEAF=0.250;MQ=29.85;MQRankSum=-0.660;QD=11.58;ReadPosRankSum=2.093;SOR=2.233	GT:AD:DP:GQ:PL	0/1:3,2:5:66:66,0,106
Fvb3	28975378	.	CT	C	130.1	PASS	AC=1;AF=0.250;AN=4;BaseQRankSum=0.525;DP=34;ExcessHet=3.0103;FS=5.225;MLEAC=1;MLEAF=0.250;MQ=49.83;MQRankSum=-0.746;QD=7.65;ReadPosRankSum=-2.113;SOR=0.086	GT:AD:DP:GQ:PL	0/1:10,7:17:99:138,0,263
Fvb5	16709568	.	T	TACATCCGTCGCTAACATAGCAACCG	978.88	PASS	AC=1;AF=0.250;AN=4;BaseQRankSum=1.058;DP=65;ExcessHet=3.0103;FS=33.463;MLEAC=1;MLEAF=0.250;MQ=53.20;MQRankSum=-7.992;QD=21.28;ReadPosRankSum=-0.218;SOR=5.345	GT:AD:DP:GQ:PL	0/1:21,25:46:99:987,0,780
Fvb5	20626854	.	T	TTC	345.96	PASS	AC=1;AF=0.250;AN=4;BaseQRankSum=-1.772;DP=53;ExcessHet=3.0103;FS=16.434;MLEAC=1;MLEAF=0.250;MQ=53.06;MQRankSum=-7.197;QD=10.18;ReadPosRankSum=3.029;SOR=2.814	GT:AD:DP:GQ:PL	0/1:22,12:34:99:354,0,888
Fvb6	16800719	.	A	AT	355.88	PASS	AC=1;AF=0.250;AN=4;BaseQRankSum=-0.383;DP=40;ExcessHet=3.0103;FS=5.498;MLEAC=1;MLEAF=0.250;MQ=40.29;MQRankSum=-1.563;QD=16.18;ReadPosRankSum=1.191;SOR=0.858	GT:AD:DP:GQ:PL	0/1:12,10:22:99:364,0,433

## Sheet: LS_rep4
CHROM	POS	ID	REF	ALT	QUAL	FILTER	INFO	FORMAT	LS_rep4
Fvb1	11701166	.	A	C	146.94	PASS	AC=1;AF=0.250;AN=4;BaseQRankSum=1.032;DP=33;ExcessHet=3.0103;FS=1.937;MLEAC=1;MLEAF=0.250;MQ=35.64;MQRankSum=0.333;QD=11.30;ReadPosRankSum=0.560;SOR=1.251	GT:AD:DP:GQ:PL	0/1:8,5:13:99:155,0,251
Fvb1	20895557	.	T	A	81.92	PASS	AC=1;AF=0.250;AN=4;BaseQRankSum=0.532;DP=23;ExcessHet=3.0103;FS=8.475;MLEAC=1;MLEAF=0.250;MQ=58.54;MQRankSum=-0.573;QD=6.83;ReadPosRankSum=-3.335;SOR=0.636	GT:AD:DP:GQ:PL	0/1:8,4:12:90:90,0,230
Fvb1	23253150	.	G	A	112.92	PASS	AC=1;AF=0.250;AN=4;BaseQRankSum=0.835;DP=49;ExcessHet=3.0103;FS=31.890;MLEAC=1;MLEAF=0.250;MQ=31.99;MQRankSum=-1.815;QD=5.94;ReadPosRankSum=-1.996;SOR=4.398	GT:AD:DP:GQ:PL	0/1:13,6:19:99:121,0,410
Fvb2	19274984	.	T	G	46.91	PASS	AC=1;AF=0.250;AN=4;BaseQRankSum=-2.675;DP=43;ExcessHet=3.0103;FS=29.283;MLEAC=1;MLEAF=0.250;MQ=53.59;MQRankSum=-0.090;QD=2.47;ReadPosRankSum=0.388;SOR=4.162	GT:AD:DP:GQ:PL	0/1:13,6:19:55:55,0,444
Fvb3	6080440	.	T	A	247.91	PASS	AC=1;AF=0.250;AN=4;BaseQRankSum=0.086;DP=68;ExcessHet=3.0103;FS=0.000;MLEAC=1;MLEAF=0.250;MQ=55.70;MQRankSum=-6.937;QD=8.00;ReadPosRankSum=-3.727;SOR=0.622	GT:AD:DP:GQ:PL	0/1:18,13:31:99:256,0,598
Fvb3	22701604	.	G	A	451.91	PASS	AC=1;AF=0.250;AN=4;BaseQRankSum=0.207;DP=45;ExcessHet=3.0103;FS=1.238;MLEAC=1;MLEAF=0.250;MQ=58.14;MQRankSum=-5.140;QD=17.38;ReadPosRankSum=-1.336;SOR=0.976	GT:AD:DP:GQ:PL	0/1:12,14:26:99:460,0,365
Fvb3	24446137	.	C	T	38.91	PASS	AC=1;AF=0.250;AN=4;BaseQRankSum=0.608;DP=26;ExcessHet=3.0103;FS=18.709;MLEAC=1;MLEAF=0.250;MQ=23.76;MQRankSum=-2.184;QD=4.32;ReadPosRankSum=0.402;SOR=2.776	GT:AD:DP:GQ:PL	0/1:6,3:9:47:47,0,144
Fvb4	1531146	.	G	A	162.99	PASS	AC=1;AF=0.250;AN=4;BaseQRankSum=-1.851;DP=36;ExcessHet=3.0103;FS=4.316;MLEAC=1;MLEAF=0.250;MQ=36.39;MQRankSum=-2.021;QD=10.19;ReadPosRankSum=-2.034;SOR=0.175	GT:AD:DP:GQ:PL	0/1:8,8:16:99:171,0,227
Fvb4	2702989	.	T	C	144.91	PASS	AC=1;AF=0.250;AN=4;BaseQRankSum=-0.790;DP=27;ExcessHet=3.0103;FS=23.965;MLEAC=1;MLEAF=0.250;MQ=54.64;MQRankSum=-4.910;QD=11.15;ReadPosRankSum=-0.913;SOR=3.896	GT:AD:DP:GQ:PL	0/1:7,6:13:99:153,0,221
Fvb4	25909322	.	T	G	180.91	PASS	AC=1;AF=0.250;AN=4;BaseQRankSum=-2.763;DP=38;ExcessHet=3.0103;FS=15.657;MLEAC=1;MLEAF=0.250;MQ=60.00;MQRankSum=0.000;QD=11.31;ReadPosRankSum=2.064;SOR=4.174	GT:AD:DP:GQ:PL	0/1:9,7:16:99:189,0,296
Fvb5	20855050	.	C	A	259.91	PASS	AC=1;AF=0.250;AN=4;BaseQRankSum=1.306;DP=48;ExcessHet=3.0103;FS=1.544;MLEAC=1;MLEAF=0.250;MQ=60.00;MQRankSum=0.000;QD=11.81;ReadPosRankSum=0.453;SOR=1.150	GT:AD:DP:GQ:PL	0/1:14,8:22:99:268,0,484
Fvb5	23419413	.	C	T	227.05	PASS	AC=1;AF=0.250;AN=4;BaseQRankSum=1.553;DP=121;ExcessHet=3.0103;FS=0.000;MLEAC=1;MLEAF=0.250;MQ=54.77;MQRankSum=-2.082;QD=11.95;ReadPosRankSum=0.783;SOR=0.838	GT:AD:DP:GQ:PL	0/1:12,7:19:99:235,0,364
Fvb6	35698983	.	A	T	987.91	PASS	AC=1;AF=0.250;AN=4;BaseQRankSum=0.248;DP=63;ExcessHet=3.0103;FS=46.163;MLEAC=1;MLEAF=0.250;MQ=54.87;MQRankSum=-7.866;QD=22.97;ReadPosRankSum=0.239;SOR=6.318	GT:AD:DP:GQ:PL	0/1:18,25:43:99:996,0,681
Fvb7	8227669	.	G	A	39.91	PASS	AC=1;AF=0.250;AN=4;BaseQRankSum=0.000;DP=26;ExcessHet=3.0103;FS=6.226;MLEAC=1;MLEAF=0.250;MQ=32.49;MQRankSum=-2.977;QD=4.43;ReadPosRankSum=0.403;SOR=2.683	GT:AD:DP:GQ:PL	0/1:6,3:9:48:48,0,179
Fvb7	21197501	.	T	C	146.91	PASS	AC=1;AF=0.250;AN=4;BaseQRankSum=1.202;DP=28;ExcessHet=3.0103;FS=1.976;MLEAC=1;MLEAF=0.250;MQ=60.00;MQRankSum=0.000;QD=9.79;ReadPosRankSum=0.392;SOR=0.223	GT:AD:DP:GQ:PL	0/1:9,6:15:99:155,0,334
Fvb1	20593136	.	ACTTTGAAATTCGTCGGCTAAAC	A	106.89	PASS	AC=1;AF=0.250;AN=4;BaseQRankSum=1.556;DP=25;ExcessHet=3.0103;FS=12.041;MLEAC=1;MLEAF=0.250;MQ=38.78;MQRankSum=-1.770;QD=11.88;ReadPosRankSum=1.619;SOR=2.788	GT:AD:DP:GQ:PL	0/1:6,3:9:99:115,0,145
Fvb2	10745035	.	TATC	T	322.88	PASS	AC=1;AF=0.250;AN=4;BaseQRankSum=-1.006;DP=39;ExcessHet=3.0103;FS=5.701;MLEAC=1;MLEAF=0.250;MQ=60.00;MQRankSum=0.000;QD=18.99;ReadPosRankSum=-2.303;SOR=1.294	GT:AD:DP:GQ:PL	0/1:8,9:17:99:331,0,309
Fvb4	2702864	.	A	AT	301.89	PASS	AC=1;AF=0.250;AN=4;BaseQRankSum=-1.211;DP=43;ExcessHet=3.0103;FS=0.000;MLEAC=1;MLEAF=0.250;MQ=44.72;MQRankSum=-2.086;QD=8.63;ReadPosRankSum=0.681;SOR=0.520	GT:AD:DP:GQ:PL	0/1:22,13:35:99:310,0,559
Fvb5	16709568	.	T	TACATCCGTCGCTAACATAGCAACCG	720.88	PASS	AC=1;AF=0.250;AN=4;BaseQRankSum=2.068;DP=67;ExcessHet=3.0103;FS=31.897;MLEAC=1;MLEAF=0.250;MQ=55.07;MQRankSum=-8.115;QD=17.16;ReadPosRankSum=-0.592;SOR=5.186	GT:AD:DP:GQ:PL	0/1:23,19:42:99:729,0,890
Fvb5	25379182	.	AGCGCACCCGGGTGCGCGGCGCACCCGGGTGCGCG	A	144.9	PASS	AC=1;AF=0.250;AN=4;BaseQRankSum=1.248;DP=18;ExcessHet=3.0103;FS=0.000;MLEAC=1;MLEAF=0.250;MQ=57.10;MQRankSum=-2.613;QD=16.10;ReadPosRankSum=-0.365;SOR=0.941	GT:AD:DP:GQ:PL	0/1:5,4:9:99:153,0,197

## Sheet: LS_rep5
CHROM	POS	ID	REF	ALT	QUAL	FILTER	INFO	FORMAT	LS_rep5
Fvb1	479289	.	C	T	354.34	PASS	AC=1;AF=0.250;AN=4;BaseQRankSum=-0.875;DP=62;ExcessHet=3.0103;FS=1.194;MLEAC=1;MLEAF=0.250;MQ=60.00;MQRankSum=0.000;QD=12.22;ReadPosRankSum=1.434;SOR=0.986	GT:AD:DP:GQ:PL	0/1:18,11:29:99:361,0,628
Fvb1	22180379	.	C	A	131.81	PASS	AC=1;AF=0.250;AN=4;BaseQRankSum=0.000;DP=25;ExcessHet=3.0103;FS=0.000;MLEAC=1;MLEAF=0.250;MQ=21.84;MQRankSum=2.083;QD=8.79;ReadPosRankSum=-0.613;SOR=0.247	GT:AD:DP:GQ:PL	0/1:8,7:15:99:139,0,173
Fvb2	6628391	.	G	A	41.92	PASS	AC=1;AF=0.250;AN=4;BaseQRankSum=-2.240;DP=20;ExcessHet=3.0103;FS=17.559;MLEAC=1;MLEAF=0.250;MQ=35.42;MQRankSum=-2.094;QD=4.19;ReadPosRankSum=0.477;SOR=2.777	GT:AD:DP:GQ:PL	0/1:7,3:10:50:50,0,212
Fvb3	6191386	.	T	C	271.91	PASS	AC=1;AF=0.250;AN=4;BaseQRankSum=0.909;DP=65;ExcessHet=3.0103;FS=0.000;MLEAC=1;MLEAF=0.250;MQ=55.51;MQRankSum=-7.355;QD=8.77;ReadPosRankSum=-0.114;SOR=0.639	GT:AD:DP:GQ:PL	0/1:20,11:31:99:280,0,682
Fvb3	11388027	.	G	C	251.91	PASS	AC=1;AF=0.250;AN=4;BaseQRankSum=-0.326;DP=54;ExcessHet=3.0103;FS=1.455;MLEAC=1;MLEAF=0.250;MQ=60.00;MQRankSum=0.000;QD=10.50;ReadPosRankSum=-0.372;SOR=1.215	GT:AD:DP:GQ:PL	0/1:15,9:24:99:260,0,537
Fvb3	12196707	.	A	C	62.93	PASS	AC=1;AF=0.250;AN=4;BaseQRankSum=-0.734;DP=32;ExcessHet=3.0103;FS=11.155;MLEAC=1;MLEAF=0.250;MQ=34.19;MQRankSum=-0.567;QD=3.15;ReadPosRankSum=-0.378;SOR=3.258	GT:AD:DP:GQ:PL	0/1:14,6:20:71:71,0,344
Fvb3	22156640	.	A	G	104.95	PASS	AC=1;AF=0.250;AN=4;BaseQRankSum=0.946;DP=31;ExcessHet=3.0103;FS=11.301;MLEAC=1;MLEAF=0.250;MQ=41.04;MQRankSum=-3.634;QD=6.56;ReadPosRankSum=1.349;SOR=3.309	GT:AD:DP:GQ:PL	0/1:11,5:16:99:113,0,380
Fvb3	25855375	.	C	T	395.91	PASS	AC=1;AF=0.250;AN=4;BaseQRankSum=-1.215;DP=52;ExcessHet=3.0103;FS=1.255;MLEAC=1;MLEAF=0.250;MQ=60.00;MQRankSum=0.000;QD=17.21;ReadPosRankSum=0.311;SOR=0.478	GT:AD:DP:GQ:PL	0/1:11,12:23:99:404,0,378
Fvb3	35483315	.	A	G	212.81	PASS	AC=1;AF=0.250;AN=4;BaseQRankSum=0.277;DP=52;ExcessHet=3.0103;FS=16.423;MLEAC=1;MLEAF=0.250;MQ=34.35;MQRankSum=-3.681;QD=7.09;ReadPosRankSum=0.638;SOR=4.057	GT:AD:DP:GQ:PL	0/1:19,11:30:99:220,0,545
Fvb4	242683	.	G	A	434.91	PASS	AC=1;AF=0.250;AN=4;BaseQRankSum=-1.258;DP=62;ExcessHet=3.0103;FS=0.000;MLEAC=1;MLEAF=0.250;MQ=60.00;MQRankSum=0.000;QD=11.15;ReadPosRankSum=0.855;SOR=0.765	GT:AD:DP:GQ:PL	0/1:24,15:39:99:443,0,886
Fvb4	2623707	.	T	G	38.91	PASS	AC=1;AF=0.250;AN=4;BaseQRankSum=-1.168;DP=41;ExcessHet=3.0103;FS=5.122;MLEAC=1;MLEAF=0.250;MQ=60.00;MQRankSum=0.000;QD=2.05;ReadPosRankSum=0.848;SOR=2.303	GT:AD:DP:GQ:PL	0/1:13,6:19:47:47,0,146
Fvb4	2702819	.	A	G	403.92	PASS	AC=1;AF=0.250;AN=4;BaseQRankSum=2.067;DP=54;ExcessHet=3.0103;FS=15.423;MLEAC=1;MLEAF=0.250;MQ=45.73;MQRankSum=0.642;QD=9.18;ReadPosRankSum=-0.849;SOR=2.978	GT:AD:DP:GQ:PL	0/1:27,17:44:99:412,0,540
Fvb4	2702989	.	T	C	535.91	PASS	AC=1;AF=0.250;AN=4;BaseQRankSum=-2.174;DP=49;ExcessHet=3.0103;FS=57.326;MLEAC=1;MLEAF=0.250;MQ=51.27;MQRankSum=-6.248;QD=14.89;ReadPosRankSum=-1.619;SOR=4.797	GT:AD:DP:GQ:PL	0/1:14,22:36:99:544,0,437
Fvb4	6270152	.	A	C	64.91	PASS	AC=1;AF=0.250;AN=4;BaseQRankSum=-2.985;DP=63;ExcessHet=3.0103;FS=23.489;MLEAC=1;MLEAF=0.250;MQ=60.00;MQRankSum=0.000;QD=2.50;ReadPosRankSum=-0.931;SOR=4.402	GT:AD:DP:GQ:PL	0/1:18,8:26:73:73,0,596
Fvb4	10443701	.	C	T	444.91	PASS	AC=1;AF=0.250;AN=4;BaseQRankSum=1.858;DP=61;ExcessHet=3.0103;FS=1.190;MLEAC=1;MLEAF=0.250;MQ=58.52;MQRankSum=-0.799;QD=14.83;ReadPosRankSum=-0.811;SOR=0.903	GT:AD:DP:GQ:PL	0/1:17,13:30:99:453,0,576
Fvb4	19740347	.	C	T	110.91	PASS	AC=1;AF=0.250;AN=4;BaseQRankSum=0.593;DP=36;ExcessHet=3.0103;FS=14.004;MLEAC=1;MLEAF=0.250;MQ=22.08;MQRankSum=-2.510;QD=5.28;ReadPosRankSum=-1.785;SOR=0.005	GT:AD:DP:GQ:PL	0/1:14,7:21:99:119,0,319
Fvb4	19740389	.	C	T	74.91	PASS	AC=1;AF=0.250;AN=4;BaseQRankSum=0.000;DP=29;ExcessHet=3.0103;FS=0.000;MLEAC=1;MLEAF=0.250;MQ=22.05;MQRankSum=-1.440;QD=4.68;ReadPosRankSum=2.109;SOR=0.056	GT:AD:DP:GQ:PL	0/1:11,5:16:83:83,0,249
Fvb4	30474808	.	A	C	68.91	PASS	AC=1;AF=0.250;AN=4;BaseQRankSum=-2.936;DP=50;ExcessHet=3.0103;FS=38.115;MLEAC=1;MLEAF=0.250;MQ=57.98;MQRankSum=-0.745;QD=2.38;ReadPosRankSum=-0.932;SOR=5.133	GT:AD:DP:GQ:PL	0/1:20,9:29:77:77,0,453
Fvb4	31056884	.	T	G	50.91	PASS	AC=1;AF=0.250;AN=4;BaseQRankSum=-3.019;DP=54;ExcessHet=3.0103;FS=24.283;MLEAC=1;MLEAF=0.250;MQ=60.00;MQRankSum=0.000;QD=2.12;ReadPosRankSum=-0.503;SOR=4.778	GT:AD:DP:GQ:PL	0/1:15,9:24:59:59,0,370
Fvb4	32921442	.	A	C	86.99	PASS	AC=1;AF=0.250;AN=4;BaseQRankSum=-1.716;DP=38;ExcessHet=3.0103;FS=17.269;MLEAC=1;MLEAF=0.250;MQ=60.00;MQRankSum=0.000;QD=4.58;ReadPosRankSum=1.052;SOR=2.797	GT:AD:DP:GQ:PL	0/1:13,6:19:95:95,0,362
Fvb5	1003938	.	A	C	73.91	PASS	AC=1;AF=0.250;AN=4;BaseQRankSum=-3.901;DP=64;ExcessHet=3.0103;FS=44.559;MLEAC=1;MLEAF=0.250;MQ=56.17;MQRankSum=-1.050;QD=2.46;ReadPosRankSum=-0.395;SOR=5.547	GT:AD:DP:GQ:PL	0/1:20,10:30:82:82,0,561
Fvb5	11458249	.	T	G	117.92	PASS	AC=1;AF=0.250;AN=4;BaseQRankSum=-3.780;DP=47;ExcessHet=3.0103;FS=54.898;MLEAC=1;MLEAF=0.250;MQ=60.00;MQRankSum=0.000;QD=5.36;ReadPosRankSum=2.415;SOR=5.131	GT:AD:DP:GQ:PL	0/1:14,8:22:99:126,0,419
Fvb5	17753202	.	T	G	124.91	PASS	AC=1;AF=0.250;AN=4;BaseQRankSum=-2.767;DP=58;ExcessHet=3.0103;FS=40.577;MLEAC=1;MLEAF=0.250;MQ=60.00;MQRankSum=0.000;QD=4.63;ReadPosRankSum=-0.495;SOR=4.972	GT:AD:DP:GQ:PL	0/1:18,9:27:99:133,0,527
Fvb5	26576068	.	G	A	99.92	PASS	AC=1;AF=0.250;AN=4;BaseQRankSum=0.617;DP=17;ExcessHet=3.0103;FS=0.000;MLEAC=1;MLEAF=0.250;MQ=60.00;MQRankSum=0.000;QD=11.10;ReadPosRankSum=-1.893;SOR=0.283	GT:AD:DP:GQ:PL	0/1:6,3:9:99:108,0,243
Fvb5	29386798	.	T	G	80.91	PASS	AC=1;AF=0.250;AN=4;BaseQRankSum=-0.916;DP=29;ExcessHet=3.0103;FS=4.205;MLEAC=1;MLEAF=0.250;MQ=60.00;MQRankSum=0.000;QD=7.36;ReadPosRankSum=-0.122;SOR=1.670	GT:AD:DP:GQ:PL	0/1:6,5:11:89:89,0,91
Fvb6	11682554	.	T	G	78.81	PASS	AC=1;AF=0.250;AN=4;BaseQRankSum=-0.202;DP=30;ExcessHet=3.0103;FS=0.000;MLEAC=1;MLEAF=0.250;MQ=60.00;MQRankSum=0.000;QD=5.25;ReadPosRankSum=1.404;SOR=0.646	GT:AD:DP:GQ:PL	0/1:8,7:15:86:86,0,118
Fvb6	13235213	.	A	C	66.91	PASS	AC=1;AF=0.250;AN=4;BaseQRankSum=-2.832;DP=53;ExcessHet=3.0103;FS=30.895;MLEAC=1;MLEAF=0.250;MQ=60.00;MQRankSum=0.000;QD=2.57;ReadPosRankSum=0.890;SOR=4.800	GT:AD:DP:GQ:PL	0/1:18,8:26:75:75,0,517
Fvb7	4611962	.	T	A	96.91	PASS	AC=1;AF=0.250;AN=4;BaseQRankSum=0.739;DP=28;ExcessHet=3.0103;FS=2.569;MLEAC=1;MLEAF=0.250;MQ=43.28;MQRankSum=-3.066;QD=6.46;ReadPosRankSum=2.464;SOR=1.863	GT:AD:DP:GQ:PL	0/1:10,5:15:99:105,0,305
Fvb7	6355392	.	C	G	103.91	PASS	AC=1;AF=0.250;AN=4;BaseQRankSum=0.839;DP=39;ExcessHet=3.0103;FS=12.481;MLEAC=1;MLEAF=0.250;MQ=35.20;MQRankSum=0.356;QD=7.99;ReadPosRankSum=-1.198;SOR=3.611	GT:AD:DP:GQ:PL	0/1:9,4:13:99:112,0,277
Fvb7	20757647	.	T	C	292.91	PASS	AC=1;AF=0.250;AN=4;BaseQRankSum=0.103;DP=46;ExcessHet=3.0103;FS=0.000;MLEAC=1;MLEAF=0.250;MQ=43.85;MQRankSum=-0.578;QD=13.95;ReadPosRankSum=1.178;SOR=0.620	GT:AD:DP:GQ:PL	0/1:12,9:21:99:301,0,433
Fvb7	21591956	.	A	C	155.91	PASS	AC=1;AF=0.250;AN=4;BaseQRankSum=-2.611;DP=49;ExcessHet=3.0103;FS=49.074;MLEAC=1;MLEAF=0.250;MQ=60.00;MQRankSum=0.000;QD=5.77;ReadPosRankSum=-0.342;SOR=5.131	GT:AD:DP:GQ:PL	0/1:17,10:27:99:164,0,443
Fvb7	23033552	.	T	A	247.91	PASS	AC=1;AF=0.250;AN=4;BaseQRankSum=1.174;DP=35;ExcessHet=3.0103;FS=15.009;MLEAC=1;MLEAF=0.250;MQ=39.16;MQRankSum=-0.404;QD=11.27;ReadPosRankSum=2.240;SOR=3.998	GT:AD:DP:GQ:PL	0/1:14,8:22:99:256,0,449
Fvb1	5927050	.	T	TA	287.88	PASS	AC=1;AF=0.250;AN=4;BaseQRankSum=2.396;DP=75;ExcessHet=3.0103;FS=5.272;MLEAC=1;MLEAF=0.250;MQ=50.70;MQRankSum=0.432;QD=5.43;ReadPosRankSum=-2.808;SOR=1.402	GT:AD:DP:GQ:PL	0/1:31,22:53:99:296,0,751
Fvb2	20362298	.	C	CT	422.88	PASS	AC=1;AF=0.250;AN=4;BaseQRankSum=1.397;DP=67;ExcessHet=3.0103;FS=2.616;MLEAC=1;MLEAF=0.250;MQ=60.00;MQRankSum=0.000;QD=12.44;ReadPosRankSum=-0.934;SOR=1.136	GT:AD:DP:GQ:PL	0/1:19,15:34:99:431,0,576
Fvb3	11606690	.	T	TC	147.88	PASS	AC=1;AF=0.250;AN=4;BaseQRankSum=1.043;DP=54;ExcessHet=3.0103;FS=10.325;MLEAC=1;MLEAF=0.250;MQ=40.92;MQRankSum=-0.243;QD=6.72;ReadPosRankSum=1.258;SOR=2.925	GT:AD:DP:GQ:PL	0/1:15,7:22:99:156,0,411
Fvb3	15064998	.	A	AT	199.88	PASS	AC=1;AF=0.250;AN=4;BaseQRankSum=-0.568;DP=46;ExcessHet=3.0103;FS=0.000;MLEAC=1;MLEAF=0.250;MQ=51.59;MQRankSum=-1.995;QD=6.89;ReadPosRankSum=-0.195;SOR=0.791	GT:AD:DP:GQ:PL	0/1:19,10:29:99:208,0,715

## Sheet: LS_rep6
CHROM	POS	ID	REF	ALT	QUAL	FILTER	INFO	FORMAT	LS_rep6
Fvb1	479289	.	C	T	478.34	PASS	AC=1;AF=0.250;AN=4;BaseQRankSum=-0.840;DP=76;ExcessHet=3.0103;FS=10.096;MLEAC=1;MLEAF=0.250;MQ=60.00;MQRankSum=0.000;QD=11.12;ReadPosRankSum=2.193;SOR=0.945	GT:AD:DP:GQ:PL	0/1:28,15:43:99:485,0,1027
Fvb1	6823347	.	T	G	67.92	PASS	AC=1;AF=0.250;AN=4;BaseQRankSum=-3.325;DP=69;ExcessHet=3.0103;FS=50.307;MLEAC=1;MLEAF=0.250;MQ=60.00;MQRankSum=0.000;QD=2.06;ReadPosRankSum=-0.699;SOR=5.782	GT:AD:DP:GQ:PL	0/1:23,10:33:76:76,0,546
Fvb1	8931885	.	G	A	560.91	PASS	AC=1;AF=0.250;AN=4;BaseQRankSum=1.577;DP=59;ExcessHet=3.0103;FS=1.142;MLEAC=1;MLEAF=0.250;MQ=60.00;MQRankSum=0.000;QD=17.00;ReadPosRankSum=0.998;SOR=0.428	GT:AD:DP:GQ:PL	0/1:17,16:33:99:569,0,561
Fvb1	8961556	.	T	G	287.93	PASS	AC=1;AF=0.250;AN=4;BaseQRankSum=1.720;DP=44;ExcessHet=3.0103;FS=21.598;MLEAC=1;MLEAF=0.250;MQ=41.96;MQRankSum=-2.513;QD=13.09;ReadPosRankSum=-0.489;SOR=4.691	GT:AD:DP:GQ:PL	0/1:13,9:22:99:296,0,423
Fvb1	12232752	.	T	G	51.91	PASS	AC=1;AF=0.250;AN=4;BaseQRankSum=-1.880;DP=36;ExcessHet=3.0103;FS=15.640;MLEAC=1;MLEAF=0.250;MQ=60.00;MQRankSum=0.000;QD=2.88;ReadPosRankSum=2.859;SOR=4.173	GT:AD:DP:GQ:PL	0/1:12,6:18:60:60,0,278
Fvb1	13964120	.	T	A	582.91	PASS	AC=1;AF=0.250;AN=4;BaseQRankSum=-0.182;DP=79;ExcessHet=3.0103;FS=1.008;MLEAC=1;MLEAF=0.250;MQ=60.00;MQRankSum=0.000;QD=11.21;ReadPosRankSum=-0.143;SOR=0.941	GT:AD:DP:GQ:PL	0/1:33,19:52:99:591,0,1118
Fvb1	22180379	.	C	A	67.81	PASS	AC=1;AF=0.250;AN=4;BaseQRankSum=0.000;DP=20;ExcessHet=3.0103;FS=0.000;MLEAC=1;MLEAF=0.250;MQ=20.83;MQRankSum=2.042;QD=6.78;ReadPosRankSum=-0.512;SOR=0.148	GT:AD:DP:GQ:PL	0/1:6,4:10:75:75,0,125
Fvb2	2105685	.	A	C	201.91	PASS	AC=1;AF=0.250;AN=4;BaseQRankSum=-3.266;DP=48;ExcessHet=3.0103;FS=41.751;MLEAC=1;MLEAF=0.250;MQ=49.97;MQRankSum=-1.758;QD=8.41;ReadPosRankSum=-0.382;SOR=5.668	GT:AD:DP:GQ:PL	0/1:10,14:24:99:210,0,286
Fvb2	8847148	.	T	G	89.91	PASS	AC=1;AF=0.250;AN=4;BaseQRankSum=-2.257;DP=38;ExcessHet=3.0103;FS=37.090;MLEAC=1;MLEAF=0.250;MQ=60.00;MQRankSum=0.000;QD=4.09;ReadPosRankSum=-1.134;SOR=4.607	GT:AD:DP:GQ:PL	0/1:14,8:22:98:98,0,425
Fvb2	25516470	.	A	T	420.91	PASS	AC=1;AF=0.250;AN=4;BaseQRankSum=1.169;DP=63;ExcessHet=3.0103;FS=1.203;MLEAC=1;MLEAF=0.250;MQ=60.00;MQRankSum=0.000;QD=12.38;ReadPosRankSum=0.866;SOR=0.976	GT:AD:DP:GQ:PL	0/1:21,13:34:99:429,0,709
Fvb3	20415328	.	C	T	49.93	PASS	AC=1;AF=0.250;AN=4;BaseQRankSum=-1.831;DP=34;ExcessHet=3.0103;FS=11.784;MLEAC=1;MLEAF=0.250;MQ=31.65;MQRankSum=-2.412;QD=4.54;ReadPosRankSum=-0.294;SOR=2.234	GT:AD:DP:GQ:PL	0/1:7,4:11:58:58,0,206
Fvb4	2702819	.	A	G	280.92	PASS	AC=1;AF=0.250;AN=4;BaseQRankSum=1.378;DP=41;ExcessHet=3.0103;FS=11.573;MLEAC=1;MLEAF=0.250;MQ=44.92;MQRankSum=0.079;QD=9.36;ReadPosRankSum=-2.359;SOR=2.780	GT:AD:DP:GQ:PL	0/1:20,10:30:99:289,0,544
Fvb4	2702989	.	T	C	431.91	PASS	AC=1;AF=0.250;AN=4;BaseQRankSum=-2.248;DP=43;ExcessHet=3.0103;FS=44.606;MLEAC=1;MLEAF=0.250;MQ=50.26;MQRankSum=-6.089;QD=14.40;ReadPosRankSum=-0.357;SOR=3.473	GT:AD:DP:GQ:PL	0/1:12,18:30:99:440,0,376
Fvb4	10443701	.	C	T	310.91	PASS	AC=1;AF=0.250;AN=4;BaseQRankSum=0.699;DP=56;ExcessHet=3.0103;FS=1.349;MLEAC=1;MLEAF=0.250;MQ=58.26;MQRankSum=0.747;QD=11.52;ReadPosRankSum=0.044;SOR=1.030	GT:AD:DP:GQ:PL	0/1:17,10:27:99:319,0,617
Fvb4	19216877	.	C	T	144.48	PASS	AC=1;AF=0.250;AN=4;BaseQRankSum=0.802;DP=42;ExcessHet=3.0103;FS=10.822;MLEAC=1;MLEAF=0.250;MQ=35.04;MQRankSum=-3.380;QD=6.88;ReadPosRankSum=-0.473;SOR=3.426	GT:AD:DP:GQ:PL	0/1:14,7:21:99:152,0,453
Fvb4	19740389	.	C	T	42.91	PASS	AC=1;AF=0.250;AN=4;BaseQRankSum=0.000;DP=22;ExcessHet=3.0103;FS=0.000;MLEAC=1;MLEAF=0.250;MQ=22.02;MQRankSum=-2.557;QD=5.36;ReadPosRankSum=1.760;SOR=0.043	GT:AD:DP:GQ:PL	0/1:5,3:8:51:51,0,113
Fvb4	22588997	.	A	C	140.91	PASS	AC=1;AF=0.250;AN=4;BaseQRankSum=-3.864;DP=35;ExcessHet=3.0103;FS=1.547;MLEAC=1;MLEAF=0.250;MQ=47.36;MQRankSum=-1.814;QD=6.13;ReadPosRankSum=2.633;SOR=1.085	GT:AD:DP:GQ:PL	0/1:15,8:23:99:149,0,501
Fvb4	31056884	.	T	G	46.91	PASS	AC=1;AF=0.250;AN=4;BaseQRankSum=-2.454;DP=47;ExcessHet=3.0103;FS=17.860;MLEAC=1;MLEAF=0.250;MQ=60.00;MQRankSum=0.000;QD=2.47;ReadPosRankSum=-1.659;SOR=4.294	GT:AD:DP:GQ:PL	0/1:12,7:19:55:55,0,263
Fvb5	28261981	.	G	A	217.92	PASS	AC=1;AF=0.250;AN=4;BaseQRankSum=-0.214;DP=67;ExcessHet=3.0103;FS=33.652;MLEAC=1;MLEAF=0.250;MQ=25.20;MQRankSum=2.849;QD=6.23;ReadPosRankSum=0.427;SOR=5.283	GT:AD:DP:GQ:PL	0/1:24,11:35:99:226,0,575
Fvb6	763875	.	A	C	58.91	PASS	AC=1;AF=0.250;AN=4;BaseQRankSum=-3.117;DP=57;ExcessHet=3.0103;FS=30.575;MLEAC=1;MLEAF=0.250;MQ=60.00;MQRankSum=0.000;QD=2.36;ReadPosRankSum=-0.106;SOR=5.257	GT:AD:DP:GQ:PL	0/1:15,10:25:67:67,0,308
Fvb6	2213152	.	G	A	405.91	PASS	AC=1;AF=0.250;AN=4;BaseQRankSum=1.470;DP=63;ExcessHet=3.0103;FS=0.000;MLEAC=1;MLEAF=0.250;MQ=58.70;MQRankSum=-0.158;QD=14.00;ReadPosRankSum=0.044;SOR=0.586	GT:AD:DP:GQ:PL	0/1:17,12:29:99:414,0,585
Fvb6	36814363	.	G	A	724.91	PASS	AC=1;AF=0.250;AN=4;BaseQRankSum=-0.638;DP=63;ExcessHet=3.0103;FS=9.607;MLEAC=1;MLEAF=0.250;MQ=60.00;MQRankSum=0.000;QD=18.59;ReadPosRankSum=1.038;SOR=1.931	GT:AD:DP:GQ:PL	0/1:17,22:39:99:733,0,546
Fvb7	17832172	.	G	A	172.91	PASS	AC=1;AF=0.250;AN=4;BaseQRankSum=-0.473;DP=40;ExcessHet=3.0103;FS=0.000;MLEAC=1;MLEAF=0.250;MQ=60.00;MQRankSum=0.000;QD=9.10;ReadPosRankSum=-2.349;SOR=0.588	GT:AD:DP:GQ:PL	0/1:13,6:19:99:181,0,474
Fvb2	19693610	.	AGTCGTCGGCTATAGTCCAGACTTTAGCCGACGAAATAAT	A	240.92	PASS	AC=1;AF=0.250;AN=4;DP=13;ExcessHet=3.0103;FS=12.175;MLEAC=1;MLEAF=0.250;MQ=34.08;MQRankSum=-2.670;QD=34.42;SOR=1.029	GT:AD:DP:GQ:PL	0/1:1,6:7:23:249,0,23
Fvb3	15064998	.	A	AT	271.88	PASS	AC=1;AF=0.250;AN=4;BaseQRankSum=-0.246;DP=42;ExcessHet=3.0103;FS=6.412;MLEAC=1;MLEAF=0.250;MQ=55.11;MQRankSum=-0.881;QD=10.88;ReadPosRankSum=-1.062;SOR=0.943	GT:AD:DP:GQ:PL	0/1:17,8:25:99:280,0,690

## Sheet: HS_rep1
CHROM	POS	ID	REF	ALT	QUAL	FILTER	INFO	FORMAT	HS_rep1
Fvb1	20059920	.	G	A	301.91	PASS	AC=1;AF=0.250;AN=4;BaseQRankSum=-0.330;DP=40;ExcessHet=3.0103;FS=1.494;MLEAC=1;MLEAF=0.250;MQ=60.00;MQRankSum=0.000;QD=16.77;ReadPosRankSum=0.722;SOR=0.751	GT:AD:DP:GQ:PL	0/1:9,9:18:99:310,0,290
Fvb1	21456723	.	G	A	102.34	PASS	AC=1;AF=0.250;AN=4;BaseQRankSum=-5.694;DP=43;ExcessHet=3.0103;FS=0.000;MLEAC=1;MLEAF=0.250;MQ=37.68;MQRankSum=-4.743;QD=7.87;ReadPosRankSum=0.701;SOR=0.752	GT:AD:DP:GQ:PL	0/1:7,6:13:99:109,0,253
Fvb2	28488794	.	A	G	130.91	PASS	AC=1;AF=0.250;AN=4;BaseQRankSum=-2.047;DP=35;ExcessHet=3.0103;FS=1.884;MLEAC=1;MLEAF=0.250;MQ=60.00;MQRankSum=0.000;QD=10.91;ReadPosRankSum=0.949;SOR=0.899	GT:AD:DP:GQ:PL	0/1:7,5:12:99:139,0,256
Fvb3	6189462	.	T	C	349.91	PASS	AC=1;AF=0.250;AN=4;BaseQRankSum=1.217;DP=57;ExcessHet=3.0103;FS=2.978;MLEAC=1;MLEAF=0.250;MQ=51.95;MQRankSum=-5.582;QD=12.96;ReadPosRankSum=-0.088;SOR=1.355	GT:AD:DP:GQ:PL	0/1:16,11:27:99:358,0,553
Fvb3	22151893	.	A	G	108.91	PASS	AC=1;AF=0.250;AN=4;BaseQRankSum=-2.442;DP=31;ExcessHet=3.0103;FS=0.000;MLEAC=1;MLEAF=0.250;MQ=48.17;MQRankSum=-3.385;QD=8.38;ReadPosRankSum=1.479;SOR=0.430	GT:AD:DP:GQ:PL	0/1:7,6:13:99:117,0,222
Fvb3	22155695	.	A	C	167.34	PASS	AC=1;AF=0.250;AN=4;BaseQRankSum=1.066;DP=47;ExcessHet=3.0103;FS=22.176;MLEAC=1;MLEAF=0.250;MQ=43.57;MQRankSum=-3.082;QD=8.37;ReadPosRankSum=0.406;SOR=4.613	GT:AD:DP:GQ:PL	0/1:14,6:20:99:174,0,494
Fvb3	27115197	.	A	T	106.91	PASS	AC=1;AF=0.250;AN=4;BaseQRankSum=0.926;DP=40;ExcessHet=3.0103;FS=0.000;MLEAC=1;MLEAF=0.250;MQ=56.67;MQRankSum=-5.380;QD=5.35;ReadPosRankSum=-2.123;SOR=0.638	GT:AD:DP:GQ:PL	0/1:14,6:20:99:115,0,487
Fvb3	27115291	.	G	A	130.91	PASS	AC=1;AF=0.250;AN=4;BaseQRankSum=-5.364;DP=49;ExcessHet=3.0103;FS=5.549;MLEAC=1;MLEAF=0.250;MQ=56.19;MQRankSum=-6.790;QD=5.69;ReadPosRankSum=0.132;SOR=1.302	GT:AD:DP:GQ:PL	0/1:14,9:23:99:139,0,516
Fvb3	31717846	.	C	T	79.91	PASS	AC=1;AF=0.250;AN=4;BaseQRankSum=0.000;DP=26;ExcessHet=3.0103;FS=0.000;MLEAC=1;MLEAF=0.250;MQ=32.31;MQRankSum=0.659;QD=8.88;ReadPosRankSum=-0.787;SOR=0.536	GT:AD:DP:GQ:PL	0/1:6,3:9:88:88,0,176
Fvb3	32821401	.	T	G	62.91	PASS	AC=1;AF=0.250;AN=4;BaseQRankSum=-2.709;DP=40;ExcessHet=3.0103;FS=29.106;MLEAC=1;MLEAF=0.250;MQ=60.00;MQRankSum=0.000;QD=2.74;ReadPosRankSum=-0.826;SOR=4.608	GT:AD:DP:GQ:PL	0/1:15,8:23:71:71,0,430
Fvb3	35528959	.	T	G	44.91	PASS	AC=1;AF=0.250;AN=4;BaseQRankSum=0.735;DP=19;ExcessHet=3.0103;FS=0.000;MLEAC=1;MLEAF=0.250;MQ=27.34;MQRankSum=-1.357;QD=5.61;ReadPosRankSum=0.560;SOR=0.223	GT:AD:DP:GQ:PL	0/1:5,3:8:53:53,0,115
Fvb3	35822382	.	T	A	80.91	PASS	AC=1;AF=0.250;AN=4;BaseQRankSum=1.480;DP=42;ExcessHet=3.0103;FS=1.690;MLEAC=1;MLEAF=0.250;MQ=55.14;MQRankSum=-5.034;QD=3.52;ReadPosRankSum=-3.096;SOR=1.251	GT:AD:DP:GQ:PL	0/1:16,7:23:89:89,0,547
Fvb3	37384597	.	C	T	189.96	PASS	AC=1;AF=0.250;AN=4;BaseQRankSum=1.491;DP=44;ExcessHet=3.0103;FS=27.577;MLEAC=1;MLEAF=0.250;MQ=56.19;MQRankSum=-6.158;QD=9.05;ReadPosRankSum=0.149;SOR=4.610	GT:AD:DP:GQ:PL	0/1:14,7:21:99:198,0,439
Fvb4	2852179	.	A	G	90.91	PASS	AC=1;AF=0.250;AN=4;BaseQRankSum=-3.110;DP=39;ExcessHet=3.0103;FS=1.670;MLEAC=1;MLEAF=0.250;MQ=55.42;MQRankSum=-5.717;QD=4.33;ReadPosRankSum=1.978;SOR=1.154	GT:AD:DP:GQ:PL	0/1:14,7:21:99:99,0,518
Fvb4	6330097	.	G	T	55.99	PASS	AC=1;AF=0.250;AN=4;BaseQRankSum=0.000;DP=26;ExcessHet=3.0103;FS=14.075;MLEAC=1;MLEAF=0.250;MQ=30.35;MQRankSum=-2.626;QD=4.31;ReadPosRankSum=1.530;SOR=3.595	GT:AD:DP:GQ:PL	0/1:9,4:13:64:64,0,265
Fvb4	19418484	.	A	G	62.92	PASS	AC=1;AF=0.250;AN=4;BaseQRankSum=0.596;DP=21;ExcessHet=3.0103;FS=6.864;MLEAC=1;MLEAF=0.250;MQ=27.49;MQRankSum=1.404;QD=7.86;ReadPosRankSum=-1.958;SOR=2.803	GT:AD:DP:GQ:PL	0/1:5,3:8:71:71,0,144
Fvb4	19418571	.	A	C	33.95	PASS	AC=1;AF=0.250;AN=4;BaseQRankSum=-0.809;DP=25;ExcessHet=3.0103;FS=17.042;MLEAC=1;MLEAF=0.250;MQ=25.66;MQRankSum=0.365;QD=3.77;ReadPosRankSum=1.862;SOR=3.228	GT:AD:DP:GQ:PL	0/1:6,3:9:42:42,0,164
Fvb4	19929576	.	T	G	51.91	PASS	AC=1;AF=0.250;AN=4;BaseQRankSum=-3.265;DP=31;ExcessHet=3.0103;FS=5.433;MLEAC=1;MLEAF=0.250;MQ=60.00;MQRankSum=0.000;QD=3.71;ReadPosRankSum=0.000;SOR=2.494	GT:AD:DP:GQ:PL	0/1:9,5:14:60:60,0,303
Fvb4	22588997	.	A	C	90.36	PASS	AC=1;AF=0.250;AN=4;BaseQRankSum=-3.809;DP=36;ExcessHet=3.0103;FS=1.547;MLEAC=1;MLEAF=0.250;MQ=52.89;MQRankSum=-1.958;QD=5.32;ReadPosRankSum=3.655;SOR=0.404	GT:AD:DP:GQ:PL	0/1:11,6:17:98:98,0,374
Fvb4	25842193	.	A	T	196.91	PASS	AC=1;AF=0.250;AN=4;BaseQRankSum=1.545;DP=30;ExcessHet=3.0103;FS=1.744;MLEAC=1;MLEAF=0.250;MQ=60.00;MQRankSum=0.000;QD=13.13;ReadPosRankSum=0.512;SOR=0.368	GT:AD:DP:GQ:PL	0/1:9,6:15:99:205,0,285
Fvb5	16359064	.	A	C	43.91	PASS	AC=1;AF=0.250;AN=4;BaseQRankSum=-2.587;DP=35;ExcessHet=3.0103;FS=5.364;MLEAC=1;MLEAF=0.250;MQ=60.00;MQRankSum=0.000;QD=3.38;ReadPosRankSum=1.143;SOR=2.476	GT:AD:DP:GQ:PL	0/1:8,5:13:52:52,0,184
Fvb5	17488508	.	C	G	52.91	PASS	AC=1;AF=0.250;AN=4;BaseQRankSum=-2.162;DP=27;ExcessHet=3.0103;FS=2.269;MLEAC=1;MLEAF=0.250;MQ=54.16;MQRankSum=-3.034;QD=5.29;ReadPosRankSum=0.419;SOR=1.087	GT:AD:DP:GQ:PL	0/1:7,3:10:61:61,0,262
Fvb5	23979267	.	A	C	91.92	PASS	AC=1;AF=0.250;AN=4;BaseQRankSum=-4.173;DP=44;ExcessHet=3.0103;FS=0.000;MLEAC=1;MLEAF=0.250;MQ=55.76;MQRankSum=-6.150;QD=4.00;ReadPosRankSum=-2.001;SOR=0.767	GT:AD:DP:GQ:PL	0/1:15,8:23:99:100,0,527
Fvb6	763875	.	A	C	93.91	PASS	AC=1;AF=0.250;AN=4;BaseQRankSum=-2.413;DP=51;ExcessHet=3.0103;FS=38.115;MLEAC=1;MLEAF=0.250;MQ=60.00;MQRankSum=0.000;QD=3.35;ReadPosRankSum=0.091;SOR=5.133	GT:AD:DP:GQ:PL	0/1:18,10:28:99:102,0,448
Fvb6	17051057	.	A	G	95.92	PASS	AC=1;AF=0.250;AN=4;BaseQRankSum=1.113;DP=22;ExcessHet=3.0103;FS=19.320;MLEAC=1;MLEAF=0.250;MQ=40.16;MQRankSum=-2.468;QD=7.99;ReadPosRankSum=-0.179;SOR=3.224	GT:AD:DP:GQ:PL	0/1:8,4:12:99:104,0,235
Fvb7	5527609	.	T	G	118.91	PASS	AC=1;AF=0.250;AN=4;BaseQRankSum=-2.924;DP=34;ExcessHet=3.0103;FS=15.051;MLEAC=1;MLEAF=0.250;MQ=60.00;MQRankSum=0.000;QD=6.26;ReadPosRankSum=0.526;SOR=3.967	GT:AD:DP:GQ:PL	0/1:11,8:19:99:127,0,340
contig_6	78819	.	A	C	177.92	PASS	AC=1;AF=0.250;AN=4;BaseQRankSum=0.921;DP=21;ExcessHet=3.0103;FS=0.000;MLEAC=1;MLEAF=0.250;MQ=39.69;MQRankSum=0.671;QD=14.83;ReadPosRankSum=1.310;SOR=0.117	GT:AD:DP:GQ:PL	0/1:7,5:12:99:186,0,266
Fvb1	24174930	.	T	TG	58.88	PASS	AC=1;AF=0.250;AN=4;BaseQRankSum=0.000;DP=16;ExcessHet=3.0103;FS=0.000;MLEAC=1;MLEAF=0.250;MQ=37.90;MQRankSum=0.351;QD=11.78;ReadPosRankSum=0.000;SOR=0.039	GT:AD:DP:GQ:PL	0/1:3,2:5:67:67,0,117
Fvb3	15437599	.	A	AT	91.88	PASS	AC=1;AF=0.250;AN=4;BaseQRankSum=0.667;DP=16;ExcessHet=3.0103;FS=0.000;MLEAC=1;MLEAF=0.250;MQ=38.09;MQRankSum=1.943;QD=15.31;ReadPosRankSum=1.231;SOR=0.784	GT:AD:DP:GQ:PL	0/1:3,3:6:99:100,0,107
Fvb4	15941861	.	A	ATTTGTTAGAGT	207.88	PASS	AC=1;AF=0.250;AN=4;BaseQRankSum=0.838;DP=41;ExcessHet=3.0103;FS=0.000;MLEAC=1;MLEAF=0.250;MQ=60.00;MQRankSum=0.000;QD=11.55;ReadPosRankSum=1.175;SOR=0.495	GT:AD:DP:GQ:PL	0/1:12,6:18:99:216,0,486
Fvb4	20578684	.	C	CAT	149.88	PASS	AC=1;AF=0.250;AN=4;BaseQRankSum=0.915;DP=27;ExcessHet=3.0103;FS=9.066;MLEAC=1;MLEAF=0.250;MQ=49.06;MQRankSum=-3.474;QD=11.53;ReadPosRankSum=-0.625;SOR=3.287	GT:AD:DP:GQ:PL	0/1:8,5:13:99:158,0,280
Fvb5	21611097	.	CCCTCTCCCTCTCCCTCTCCGCCGGGCCTCCGCCT	C	80.9	PASS	AC=1;AF=0.250;AN=4;BaseQRankSum=0.319;DP=21;ExcessHet=3.0103;FS=6.803;MLEAC=1;MLEAF=0.250;MQ=54.73;MQRankSum=-2.680;QD=10.11;ReadPosRankSum=1.543;SOR=2.817	GT:AD:DP:GQ:PL	0/1:5,3:8:89:89,0,147
Fvb6	793840	.	T	TC	197.88	PASS	AC=1;AF=0.250;AN=4;BaseQRankSum=-0.720;DP=39;ExcessHet=3.0103;FS=3.952;MLEAC=1;MLEAF=0.250;MQ=60.00;MQRankSum=0.000;QD=10.99;ReadPosRankSum=-0.118;SOR=1.582	GT:AD:DP:GQ:PL	0/1:11,7:18:99:206,0,342

## Sheet: HS_rep2
CHROM	POS	ID	REF	ALT	QUAL	FILTER	INFO	FORMAT	HS_rep2
Fvb1	12061499	.	A	C	309.91	PASS	AC=1;AF=0.250;AN=4;BaseQRankSum=-0.492;DP=48;ExcessHet=3.0103;FS=0.000;MLEAC=1;MLEAF=0.250;MQ=53.96;MQRankSum=-2.156;QD=10.33;ReadPosRankSum=-1.043;SOR=0.610	GT:AD:DP:GQ:PL	0/1:19,11:30:99:318,0,601
Fvb2	11941	.	G	A	244.91	PASS	AC=1;AF=0.250;AN=4;BaseQRankSum=1.047;DP=39;ExcessHet=3.0103;FS=22.860;MLEAC=1;MLEAF=0.250;MQ=33.59;MQRankSum=1.250;QD=10.65;ReadPosRankSum=-0.939;SOR=4.613	GT:AD:DP:GQ:PL	0/1:14,9:23:99:253,0,453
Fvb2	500845	.	C	T	440.91	PASS	AC=1;AF=0.250;AN=4;BaseQRankSum=0.582;DP=41;ExcessHet=3.0103;FS=0.000;MLEAC=1;MLEAF=0.250;MQ=60.00;MQRankSum=0.000;QD=22.05;ReadPosRankSum=0.491;SOR=0.567	GT:AD:DP:GQ:PL	0/1:7,13:20:99:449,0,194
Fvb2	6474349	.	C	T	264.91	PASS	AC=1;AF=0.250;AN=4;BaseQRankSum=-1.163;DP=48;ExcessHet=3.0103;FS=0.000;MLEAC=1;MLEAF=0.250;MQ=60.00;MQRankSum=0.000;QD=11.52;ReadPosRankSum=-0.320;SOR=0.758	GT:AD:DP:GQ:PL	0/1:14,9:23:99:273,0,502
Fvb2	6884485	.	T	C	549.91	PASS	AC=1;AF=0.250;AN=4;BaseQRankSum=-0.234;DP=52;ExcessHet=3.0103;FS=22.156;MLEAC=1;MLEAF=0.250;MQ=59.78;MQRankSum=-0.381;QD=16.17;ReadPosRankSum=-0.365;SOR=1.272	GT:AD:DP:GQ:PL	0/1:16,18:34:99:558,0,471
Fvb2	19788935	.	T	A	450.91	PASS	AC=1;AF=0.250;AN=4;BaseQRankSum=0.825;DP=56;ExcessHet=3.0103;FS=2.698;MLEAC=1;MLEAF=0.250;MQ=60.00;MQRankSum=0.000;QD=16.10;ReadPosRankSum=1.507;SOR=0.633	GT:AD:DP:GQ:PL	0/1:15,13:28:99:459,0,542
Fvb2	26485205	.	T	A	338.91	PASS	AC=1;AF=0.250;AN=4;BaseQRankSum=-1.004;DP=54;ExcessHet=3.0103;FS=2.929;MLEAC=1;MLEAF=0.250;MQ=60.00;MQRankSum=0.000;QD=13.04;ReadPosRankSum=-0.204;SOR=0.646	GT:AD:DP:GQ:PL	0/1:15,11:26:99:347,0,536
Fvb3	9850160	.	C	T	491.91	PASS	AC=1;AF=0.250;AN=4;BaseQRankSum=0.819;DP=52;ExcessHet=3.0103;FS=4.459;MLEAC=1;MLEAF=0.250;MQ=60.00;MQRankSum=0.000;QD=16.40;ReadPosRankSum=0.889;SOR=1.450	GT:AD:DP:GQ:PL	0/1:15,15:30:99:500,0,494
Fvb3	15437759	.	T	C	182.92	PASS	AC=1;AF=0.250;AN=4;BaseQRankSum=1.980;DP=29;ExcessHet=3.0103;FS=38.166;MLEAC=1;MLEAF=0.250;MQ=44.10;MQRankSum=-2.503;QD=11.43;ReadPosRankSum=0.490;SOR=4.395	GT:AD:DP:GQ:PL	0/1:8,8:16:99:191,0,315
Fvb3	18723518	.	C	A	458.91	PASS	AC=1;AF=0.250;AN=4;BaseQRankSum=-0.179;DP=52;ExcessHet=3.0103;FS=2.686;MLEAC=1;MLEAF=0.250;MQ=60.00;MQRankSum=0.000;QD=13.11;ReadPosRankSum=1.724;SOR=1.186	GT:AD:DP:GQ:PL	0/1:21,14:35:99:467,0,738
Fvb3	19634590	.	T	A	211.91	PASS	AC=1;AF=0.250;AN=4;BaseQRankSum=-2.260;DP=49;ExcessHet=3.0103;FS=6.078;MLEAC=1;MLEAF=0.250;MQ=58.27;MQRankSum=-0.232;QD=10.09;ReadPosRankSum=-1.042;SOR=1.825	GT:AD:DP:GQ:PL	0/1:13,8:21:99:220,0,448
Fvb3	22151893	.	A	G	342.91	PASS	AC=1;AF=0.250;AN=4;BaseQRankSum=-3.279;DP=42;ExcessHet=3.0103;FS=4.918;MLEAC=1;MLEAF=0.250;MQ=46.62;MQRankSum=-3.880;QD=13.72;ReadPosRankSum=0.280;SOR=0.223	GT:AD:DP:GQ:PL	0/1:11,14:25:99:351,0,328
Fvb3	23485801	.	A	C	54.91	PASS	AC=1;AF=0.250;AN=4;BaseQRankSum=-4.204;DP=40;ExcessHet=3.0103;FS=15.428;MLEAC=1;MLEAF=0.250;MQ=59.32;MQRankSum=-3.015;QD=2.50;ReadPosRankSum=0.293;SOR=4.174	GT:AD:DP:GQ:PL	0/1:15,7:22:63:63,0,530
Fvb3	25549720	.	G	A	462.91	PASS	AC=1;AF=0.250;AN=4;BaseQRankSum=0.590;DP=42;ExcessHet=3.0103;FS=0.000;MLEAC=1;MLEAF=0.250;MQ=60.00;MQRankSum=0.000;QD=18.52;ReadPosRankSum=-1.428;SOR=0.658	GT:AD:DP:GQ:PL	0/1:11,14:25:99:471,0,321
Fvb3	26921912	.	T	A	510.91	PASS	AC=1;AF=0.250;AN=4;BaseQRankSum=0.683;DP=49;ExcessHet=3.0103;FS=0.000;MLEAC=1;MLEAF=0.250;MQ=58.62;MQRankSum=-1.324;QD=19.65;ReadPosRankSum=-1.027;SOR=0.693	GT:AD:DP:GQ:PL	0/1:10,16:26:99:519,0,343
Fvb3	28471245	.	A	T	369.91	PASS	AC=1;AF=0.250;AN=4;BaseQRankSum=0.184;DP=53;ExcessHet=3.0103;FS=0.000;MLEAC=1;MLEAF=0.250;MQ=50.21;MQRankSum=0.140;QD=16.08;ReadPosRankSum=-0.378;SOR=0.557	GT:AD:DP:GQ:PL	0/1:11,12:23:99:378,0,330
Fvb3	28566358	.	T	C	504.91	PASS	AC=1;AF=0.250;AN=4;BaseQRankSum=1.310;DP=42;ExcessHet=3.0103;FS=10.135;MLEAC=1;MLEAF=0.250;MQ=60.00;MQRankSum=0.000;QD=22.95;ReadPosRankSum=-1.197;SOR=1.117	GT:AD:DP:GQ:PL	0/1:8,14:22:99:513,0,268
Fvb3	35049977	.	A	C	581.91	PASS	AC=1;AF=0.250;AN=4;BaseQRankSum=-3.686;DP=53;ExcessHet=3.0103;FS=0.000;MLEAC=1;MLEAF=0.250;MQ=60.00;MQRankSum=0.000;QD=17.63;ReadPosRankSum=0.133;SOR=0.620	GT:AD:DP:GQ:PL	0/1:14,19:33:99:590,0,482
Fvb4	2702989	.	T	C	296.04	PASS	AC=1;AF=0.250;AN=4;BaseQRankSum=-1.754;DP=44;ExcessHet=3.0103;FS=42.225;MLEAC=1;MLEAF=0.250;MQ=50.38;MQRankSum=-6.022;QD=8.71;ReadPosRankSum=-2.818;SOR=3.085	GT:AD:DP:GQ:PL	0/1:20,14:34:99:303,0,676
Fvb4	3423989	.	G	T	453.91	PASS	AC=1;AF=0.250;AN=4;BaseQRankSum=1.323;DP=46;ExcessHet=3.0103;FS=0.000;MLEAC=1;MLEAF=0.250;MQ=60.00;MQRankSum=0.000;QD=16.81;ReadPosRankSum=-0.317;SOR=0.772	GT:AD:DP:GQ:PL	0/1:14,13:27:99:462,0,460
Fvb4	4624040	.	G	A	263.96	PASS	AC=1;AF=0.250;AN=4;BaseQRankSum=1.285;DP=28;ExcessHet=3.0103;FS=15.838;MLEAC=1;MLEAF=0.250;MQ=37.53;MQRankSum=-3.346;QD=18.85;ReadPosRankSum=-1.354;SOR=4.427	GT:AD:DP:GQ:PL	0/1:6,8:14:99:272,0,198
Fvb4	18014841	.	C	T	239.91	PASS	AC=1;AF=0.250;AN=4;BaseQRankSum=-0.168;DP=44;ExcessHet=3.0103;FS=14.328;MLEAC=1;MLEAF=0.250;MQ=60.00;MQRankSum=0.000;QD=13.33;ReadPosRankSum=-0.531;SOR=1.727	GT:AD:DP:GQ:PL	0/1:10,8:18:99:248,0,361
Fvb4	21995097	.	C	T	241.91	PASS	AC=1;AF=0.250;AN=4;BaseQRankSum=0.190;DP=54;ExcessHet=3.0103;FS=1.563;MLEAC=1;MLEAF=0.250;MQ=60.00;MQRankSum=0.000;QD=10.08;ReadPosRankSum=0.510;SOR=0.326	GT:AD:DP:GQ:PL	0/1:16,8:24:99:250,0,552
Fvb5	14119406	.	G	C	290.04	PASS	AC=1;AF=0.250;AN=4;BaseQRankSum=-0.999;DP=72;ExcessHet=3.0103;FS=12.103;MLEAC=1;MLEAF=0.250;MQ=57.50;MQRankSum=-2.526;QD=8.53;ReadPosRankSum=0.486;SOR=2.642	GT:AD:DP:GQ:PL	0/1:23,11:34:99:297,0,784
Fvb5	17915959	.	A	G	414.91	PASS	AC=1;AF=0.250;AN=4;BaseQRankSum=0.943;DP=44;ExcessHet=3.0103;FS=1.295;MLEAC=1;MLEAF=0.250;MQ=60.00;MQRankSum=0.000;QD=15.96;ReadPosRankSum=-1.156;SOR=0.473	GT:AD:DP:GQ:PL	0/1:14,12:26:99:423,0,507
Fvb5	28491511	.	G	A	243.91	PASS	AC=1;AF=0.250;AN=4;BaseQRankSum=0.966;DP=48;ExcessHet=3.0103;FS=3.615;MLEAC=1;MLEAF=0.250;MQ=58.85;MQRankSum=0.146;QD=9.38;ReadPosRankSum=-1.204;SOR=0.238	GT:AD:DP:GQ:PL	0/1:18,8:26:99:252,0,635
Fvb6	131271	.	C	T	302.91	PASS	AC=1;AF=0.250;AN=4;BaseQRankSum=1.785;DP=41;ExcessHet=3.0103;FS=1.435;MLEAC=1;MLEAF=0.250;MQ=60.00;MQRankSum=0.000;QD=13.77;ReadPosRankSum=0.756;SOR=0.802	GT:AD:DP:GQ:PL	0/1:13,9:22:99:311,0,367
Fvb6	4773502	.	A	G	302	PASS	AC=1;AF=0.250;AN=4;BaseQRankSum=0.000;DP=43;ExcessHet=3.0103;FS=0.000;MLEAC=1;MLEAF=0.250;MQ=60.00;MQRankSum=0.000;QD=13.73;ReadPosRankSum=1.438;SOR=0.651	GT:AD:DP:GQ:PL	0/1:13,9:22:99:310,0,476
Fvb6	11347578	.	G	T	309.91	PASS	AC=1;AF=0.250;AN=4;BaseQRankSum=-1.662;DP=41;ExcessHet=3.0103;FS=3.189;MLEAC=1;MLEAF=0.250;MQ=60.00;MQRankSum=0.000;QD=14.76;ReadPosRankSum=0.000;SOR=1.312	GT:AD:DP:GQ:PL	0/1:11,10:21:99:318,0,396
Fvb6	16460805	.	A	T	132.92	PASS	AC=1;AF=0.250;AN=4;BaseQRankSum=-0.999;DP=22;ExcessHet=3.0103;FS=0.000;MLEAC=1;MLEAF=0.250;MQ=30.15;MQRankSum=0.742;QD=10.22;ReadPosRankSum=0.520;SOR=0.368	GT:AD:DP:GQ:PL	0/1:9,4:13:99:141,0,366
Fvb6	17501357	.	G	A	68.92	PASS	AC=1;AF=0.250;AN=4;BaseQRankSum=-0.247;DP=29;ExcessHet=3.0103;FS=8.418;MLEAC=1;MLEAF=0.250;MQ=37.35;MQRankSum=-2.953;QD=6.89;ReadPosRankSum=0.720;SOR=2.833	GT:AD:DP:GQ:PL	0/1:6,4:10:77:77,0,221
Fvb6	25077625	.	G	A	457.91	PASS	AC=1;AF=0.250;AN=4;BaseQRankSum=-0.072;DP=54;ExcessHet=3.0103;FS=0.000;MLEAC=1;MLEAF=0.250;MQ=60.00;MQRankSum=0.000;QD=12.05;ReadPosRankSum=-1.521;SOR=0.793	GT:AD:DP:GQ:PL	0/1:23,15:38:99:466,0,766
Fvb6	26751722	.	C	A	182.27	PASS	AC=1;AF=0.250;AN=4;BaseQRankSum=0.787;DP=38;ExcessHet=3.0103;FS=23.318;MLEAC=1;MLEAF=0.250;MQ=44.77;MQRankSum=0.199;QD=8.28;ReadPosRankSum=1.040;SOR=4.402	GT:AD:DP:GQ:PL	0/1:15,7:22:99:190,0,488
contig_15	22519	.	T	C	77.91	PASS	AC=1;AF=0.250;AN=4;BaseQRankSum=1.392;DP=21;ExcessHet=3.0103;FS=6.767;MLEAC=1;MLEAF=0.250;MQ=39.90;MQRankSum=-1.274;QD=8.66;ReadPosRankSum=1.694;SOR=2.805	GT:AD:DP:GQ:PL	0/1:6,3:9:86:86,0,148
contig_6	78819	.	A	C	371.92	PASS	AC=1;AF=0.250;AN=4;BaseQRankSum=-0.651;DP=31;ExcessHet=3.0103;FS=0.000;MLEAC=1;MLEAF=0.250;MQ=39.79;MQRankSum=-1.306;QD=18.60;ReadPosRankSum=0.964;SOR=0.264	GT:AD:DP:GQ:PL	0/1:10,10:20:99:380,0,380
Fvb1	15469681	.	A	AT	36.88	PASS	AC=1;AF=0.250;AN=4;BaseQRankSum=-2.038;DP=16;ExcessHet=3.0103;FS=3.222;MLEAC=1;MLEAF=0.250;MQ=29.81;MQRankSum=0.607;QD=6.15;ReadPosRankSum=-1.105;SOR=0.124	GT:AD:DP:GQ:PL	0/1:4,2:6:45:45,0,109
Fvb3	28975378	.	CT	C	121.1	PASS	AC=1;AF=0.250;AN=4;BaseQRankSum=-0.151;DP=38;ExcessHet=3.0103;FS=1.908;MLEAC=1;MLEAF=0.250;MQ=47.71;MQRankSum=0.432;QD=5.50;ReadPosRankSum=-2.944;SOR=1.402	GT:AD:DP:GQ:PL	0/1:13,9:22:99:129,0,347
Fvb4	1596826	.	A	AAAGAACAGGGG	270.88	PASS	AC=1;AF=0.250;AN=4;BaseQRankSum=1.113;DP=42;ExcessHet=3.0103;FS=17.307;MLEAC=1;MLEAF=0.250;MQ=57.33;MQRankSum=-6.363;QD=9.67;ReadPosRankSum=1.257;SOR=4.047	GT:AD:DP:GQ:PL	0/1:19,9:28:99:279,0,774
Fvb6	16460807	.	T	TTAGC	132.88	PASS	AC=1;AF=0.250;AN=4;BaseQRankSum=0.589;DP=22;ExcessHet=3.0103;FS=0.000;MLEAC=1;MLEAF=0.250;MQ=30.15;MQRankSum=0.742;QD=10.22;ReadPosRankSum=0.936;SOR=0.368	GT:AD:DP:GQ:PL	0/1:9,4:13:99:141,0,366

## Sheet: HS_rep3
CHROM	POS	ID	REF	ALT	QUAL	FILTER	INFO	FORMAT	HS_rep3
Fvb1	20588839	.	T	A	281.91	PASS	AC=1;AF=0.250;AN=4;BaseQRankSum=0.396;DP=36;ExcessHet=3.0103;FS=1.500;MLEAC=1;MLEAF=0.250;MQ=47.41;MQRankSum=-0.060;QD=14.84;ReadPosRankSum=0.568;SOR=1.034	GT:AD:DP:GQ:PL	0/1:9,10:19:99:290,0,289
Fvb1	23246875	.	G	A	220.91	PASS	AC=1;AF=0.250;AN=4;BaseQRankSum=-2.326;DP=45;ExcessHet=3.0103;FS=5.612;MLEAC=1;MLEAF=0.250;MQ=59.55;MQRankSum=-0.599;QD=8.50;ReadPosRankSum=-0.335;SOR=0.550	GT:AD:DP:GQ:PL	0/1:17,9:26:99:229,0,628
Fvb2	5239455	.	C	T	342.91	PASS	AC=1;AF=0.250;AN=4;BaseQRankSum=1.409;DP=68;ExcessHet=3.0103;FS=1.286;MLEAC=1;MLEAF=0.250;MQ=58.94;MQRankSum=-2.981;QD=9.53;ReadPosRankSum=0.415;SOR=0.461	GT:AD:DP:GQ:PL	0/1:25,11:36:99:351,0,902
Fvb2	6451241	.	C	A	99.09	PASS	AC=1;AF=0.250;AN=4;BaseQRankSum=-0.461;DP=32;ExcessHet=3.0103;FS=4.041;MLEAC=1;MLEAF=0.250;MQ=30.93;MQRankSum=-2.818;QD=6.61;ReadPosRankSum=-1.016;SOR=1.555	GT:AD:DP:GQ:PL	0/1:10,5:15:99:107,0,281
Fvb2	12217052	.	G	A	220.92	PASS	AC=1;AF=0.250;AN=4;BaseQRankSum=0.870;DP=30;ExcessHet=3.0103;FS=6.945;MLEAC=1;MLEAF=0.250;MQ=60.00;MQRankSum=0.000;QD=10.52;ReadPosRankSum=2.424;SOR=2.279	GT:AD:DP:GQ:PL	0/1:14,7:21:99:229,0,519
Fvb2	17428647	.	T	C	476.91	PASS	AC=1;AF=0.250;AN=4;BaseQRankSum=-1.248;DP=42;ExcessHet=3.0103;FS=0.000;MLEAC=1;MLEAF=0.250;MQ=60.00;MQRankSum=0.000;QD=21.68;ReadPosRankSum=-1.843;SOR=0.627	GT:AD:DP:GQ:PL	0/1:8,14:22:99:485,0,268
Fvb2	27403841	.	C	T	375.09	PASS	AC=1;AF=0.250;AN=4;BaseQRankSum=0.496;DP=90;ExcessHet=3.0103;FS=17.483;MLEAC=1;MLEAF=0.250;MQ=58.35;MQRankSum=-5.133;QD=8.15;ReadPosRankSum=-1.922;SOR=3.126	GT:AD:DP:GQ:PL	0/1:32,14:46:99:383,0,1007
Fvb3	1815119	.	G	A	336.91	PASS	AC=1;AF=0.250;AN=4;BaseQRankSum=-0.514;DP=62;ExcessHet=3.0103;FS=4.549;MLEAC=1;MLEAF=0.250;MQ=60.00;MQRankSum=0.000;QD=9.11;ReadPosRankSum=0.203;SOR=1.053	GT:AD:DP:GQ:PL	0/1:24,13:37:99:345,0,777
Fvb3	11884300	.	G	A	699.91	PASS	AC=1;AF=0.250;AN=4;BaseQRankSum=-0.509;DP=51;ExcessHet=3.0103;FS=3.989;MLEAC=1;MLEAF=0.250;MQ=60.00;MQRankSum=0.000;QD=25.00;ReadPosRankSum=0.109;SOR=1.053	GT:AD:DP:GQ:PL	0/1:8,20:28:99:708,0,211
Fvb3	15437759	.	T	C	165.92	PASS	AC=1;AF=0.250;AN=4;BaseQRankSum=2.342;DP=29;ExcessHet=3.0103;FS=18.479;MLEAC=1;MLEAF=0.250;MQ=48.82;MQRankSum=-1.624;QD=8.30;ReadPosRankSum=-0.708;SOR=2.790	GT:AD:DP:GQ:PL	0/1:12,8:20:99:174,0,460
Fvb3	23459661	.	T	G	149.96	PASS	AC=1;AF=0.250;AN=4;BaseQRankSum=-4.183;DP=34;ExcessHet=3.0103;FS=10.836;MLEAC=1;MLEAF=0.250;MQ=41.08;MQRankSum=1.851;QD=8.33;ReadPosRankSum=0.840;SOR=0.864	GT:AD:DP:GQ:PL	0/1:11,7:18:99:158,0,405
Fvb4	867393	.	C	A	115.04	PASS	AC=1;AF=0.250;AN=4;BaseQRankSum=-0.731;DP=28;ExcessHet=3.0103;FS=12.270;MLEAC=1;MLEAF=0.250;MQ=24.51;MQRankSum=-0.115;QD=6.77;ReadPosRankSum=-1.882;SOR=3.816	GT:AD:DP:GQ:PL	0/1:11,6:17:99:122,0,269
Fvb4	2702989	.	T	C	380.48	PASS	AC=1;AF=0.250;AN=4;BaseQRankSum=-0.488;DP=41;ExcessHet=3.0103;FS=34.380;MLEAC=1;MLEAF=0.250;MQ=49.66;MQRankSum=-5.797;QD=12.68;ReadPosRankSum=-1.451;SOR=3.356	GT:AD:DP:GQ:PL	0/1:14,16:30:99:388,0,444
Fvb4	5599207	.	T	A	337.91	PASS	AC=1;AF=0.250;AN=4;BaseQRankSum=1.650;DP=41;ExcessHet=3.0103;FS=0.000;MLEAC=1;MLEAF=0.250;MQ=59.98;MQRankSum=0.625;QD=14.08;ReadPosRankSum=-0.608;SOR=0.859	GT:AD:DP:GQ:PL	0/1:14,10:24:99:346,0,444
Fvb4	14801737	.	T	G	292.92	PASS	AC=1;AF=0.250;AN=4;BaseQRankSum=1.460;DP=34;ExcessHet=3.0103;FS=23.580;MLEAC=1;MLEAF=0.250;MQ=33.10;MQRankSum=3.982;QD=11.72;ReadPosRankSum=0.332;SOR=4.612	GT:AD:DP:GQ:PL	0/1:16,9:25:99:301,0,438
Fvb4	15425519	.	G	T	54.92	PASS	AC=1;AF=0.250;AN=4;BaseQRankSum=0.535;DP=35;ExcessHet=3.0103;FS=4.099;MLEAC=1;MLEAF=0.250;MQ=35.46;MQRankSum=-2.043;QD=3.43;ReadPosRankSum=-0.497;SOR=1.609	GT:AD:DP:GQ:PL	0/1:11,5:16:63:63,0,314
Fvb4	18625798	.	T	G	235.91	PASS	AC=1;AF=0.250;AN=4;BaseQRankSum=-0.784;DP=58;ExcessHet=3.0103;FS=5.624;MLEAC=1;MLEAF=0.250;MQ=60.00;MQRankSum=0.000;QD=10.26;ReadPosRankSum=-0.419;SOR=1.268	GT:AD:DP:GQ:PL	0/1:14,9:23:99:244,0,439
Fvb4	24203478	.	T	C	632.91	PASS	AC=1;AF=0.250;AN=4;BaseQRankSum=0.863;DP=59;ExcessHet=3.0103;FS=0.000;MLEAC=1;MLEAF=0.250;MQ=60.00;MQRankSum=0.000;QD=19.18;ReadPosRankSum=-0.708;SOR=0.573	GT:AD:DP:GQ:PL	0/1:15,18:33:99:641,0,493
Fvb4	29826981	.	T	G	433.91	PASS	AC=1;AF=0.250;AN=4;BaseQRankSum=-0.071;DP=62;ExcessHet=3.0103;FS=1.154;MLEAC=1;MLEAF=0.250;MQ=60.00;MQRankSum=0.000;QD=11.73;ReadPosRankSum=-0.628;SOR=0.893	GT:AD:DP:GQ:PL	0/1:22,15:37:99:442,0,765
Fvb4	29880009	.	C	T	403.91	PASS	AC=1;AF=0.250;AN=4;BaseQRankSum=-2.438;DP=54;ExcessHet=3.0103;FS=6.744;MLEAC=1;MLEAF=0.250;MQ=60.00;MQRankSum=0.000;QD=14.43;ReadPosRankSum=-0.300;SOR=0.998	GT:AD:DP:GQ:PL	0/1:15,13:28:99:412,0,530
Fvb5	14119406	.	G	C	492.04	PASS	AC=1;AF=0.250;AN=4;BaseQRankSum=0.378;DP=84;ExcessHet=3.0103;FS=13.127;MLEAC=1;MLEAF=0.250;MQ=57.17;MQRankSum=-3.909;QD=9.84;ReadPosRankSum=0.071;SOR=2.014	GT:AD:DP:GQ:PL	0/1:30,20:50:99:499,0,1008
Fvb5	17762274	.	G	A	421.91	PASS	AC=1;AF=0.250;AN=4;BaseQRankSum=-1.002;DP=69;ExcessHet=3.0103;FS=2.510;MLEAC=1;MLEAF=0.250;MQ=60.00;MQRankSum=0.000;QD=11.40;ReadPosRankSum=1.660;SOR=0.408	GT:AD:DP:GQ:PL	0/1:23,14:37:99:430,0,778
Fvb5	22760452	.	C	T	641.91	PASS	AC=1;AF=0.250;AN=4;BaseQRankSum=1.175;DP=60;ExcessHet=3.0103;FS=1.061;MLEAC=1;MLEAF=0.250;MQ=60.00;MQRankSum=0.000;QD=18.34;ReadPosRankSum=-0.161;SOR=0.540	GT:AD:DP:GQ:PL	0/1:17,18:35:99:650,0,534
Fvb6	29738365	.	C	T	187.91	PASS	AC=1;AF=0.250;AN=4;BaseQRankSum=0.000;DP=29;ExcessHet=3.0103;FS=4.505;MLEAC=1;MLEAF=0.250;MQ=60.00;MQRankSum=0.000;QD=10.44;ReadPosRankSum=0.350;SOR=2.160	GT:AD:DP:GQ:PL	0/1:12,6:18:99:196,0,439
Fvb6	36715039	.	C	T	368.91	PASS	AC=1;AF=0.250;AN=4;BaseQRankSum=0.633;DP=51;ExcessHet=3.0103;FS=4.909;MLEAC=1;MLEAF=0.250;MQ=60.00;MQRankSum=0.000;QD=12.30;ReadPosRankSum=1.676;SOR=1.554	GT:AD:DP:GQ:PL	0/1:18,12:30:99:377,0,650
Fvb7	7087635	.	C	T	521.91	PASS	AC=1;AF=0.250;AN=4;BaseQRankSum=-2.023;DP=47;ExcessHet=3.0103;FS=0.000;MLEAC=1;MLEAF=0.250;MQ=60.00;MQRankSum=0.000;QD=21.75;ReadPosRankSum=0.399;SOR=0.746	GT:AD:DP:GQ:PL	0/1:9,15:24:99:530,0,304
Fvb7	7460949	.	G	A	238.91	PASS	AC=1;AF=0.250;AN=4;BaseQRankSum=0.214;DP=46;ExcessHet=3.0103;FS=0.000;MLEAC=1;MLEAF=0.250;MQ=60.00;MQRankSum=0.000;QD=11.38;ReadPosRankSum=-0.783;SOR=0.693	GT:AD:DP:GQ:PL	0/1:13,8:21:99:247,0,451
Fvb7	17604282	.	A	T	292.91	PASS	AC=1;AF=0.250;AN=4;BaseQRankSum=1.424;DP=47;ExcessHet=3.0103;FS=0.000;MLEAC=1;MLEAF=0.250;MQ=60.00;MQRankSum=0.000;QD=11.72;ReadPosRankSum=0.970;SOR=0.851	GT:AD:DP:GQ:PL	0/1:16,9:25:99:301,0,542
Fvb7	19282600	.	G	A	685.91	PASS	AC=1;AF=0.250;AN=4;BaseQRankSum=0.733;DP=64;ExcessHet=3.0103;FS=15.574;MLEAC=1;MLEAF=0.250;MQ=60.00;MQRankSum=0.000;QD=20.17;ReadPosRankSum=1.860;SOR=0.822	GT:AD:DP:GQ:PL	0/1:14,20:34:99:694,0,485
contig_6	78819	.	A	C	371.92	PASS	AC=1;AF=0.250;AN=4;BaseQRankSum=1.096;DP=29;ExcessHet=3.0103;FS=0.000;MLEAC=1;MLEAF=0.250;MQ=40.00;MQRankSum=0.000;QD=18.60;ReadPosRankSum=0.344;SOR=0.264	GT:AD:DP:GQ:PL	0/1:10,10:20:99:380,0,377
Fvb1	9446744	.	CGAAACT	C	206.88	PASS	AC=1;AF=0.250;AN=4;BaseQRankSum=1.117;DP=40;ExcessHet=3.0103;FS=1.762;MLEAC=1;MLEAF=0.250;MQ=60.00;MQRankSum=0.000;QD=12.17;ReadPosRankSum=-1.620;SOR=1.241	GT:AD:DP:GQ:PL	0/1:11,6:17:99:215,0,397
Fvb1	10114518	.	A	AACCCTAG	197.88	PASS	AC=1;AF=0.250;AN=4;BaseQRankSum=0.864;DP=40;ExcessHet=3.0103;FS=1.830;MLEAC=1;MLEAF=0.250;MQ=60.00;MQRankSum=0.000;QD=9.89;ReadPosRankSum=1.541;SOR=1.294	GT:AD:DP:GQ:PL	0/1:14,6:20:99:206,0,547
Fvb1	20593136	.	ACTTTGAAATTCGTCGGCTAAAC	A	55.89	PASS	AC=1;AF=0.250;AN=4;BaseQRankSum=-1.085;DP=25;ExcessHet=3.0103;FS=0.000;MLEAC=1;MLEAF=0.250;MQ=43.26;MQRankSum=0.059;QD=5.59;ReadPosRankSum=-0.832;SOR=0.330	GT:AD:DP:GQ:PL	0/1:7,3:10:64:64,0,287
Fvb2	27403842	.	GGT	G	375.05	PASS	AC=1;AF=0.250;AN=4;BaseQRankSum=-1.244;DP=89;ExcessHet=3.0103;FS=20.561;MLEAC=1;MLEAF=0.250;MQ=58.33;MQRankSum=-5.133;QD=8.15;ReadPosRankSum=-1.325;SOR=3.121	GT:AD:DP:GQ:PL	0/1:32,14:46:99:383,0,1007
Fvb3	24060981	.	A	AT	450.88	PASS	AC=1;AF=0.250;AN=4;BaseQRankSum=-1.825;DP=54;ExcessHet=3.0103;FS=1.101;MLEAC=1;MLEAF=0.250;MQ=60.00;MQRankSum=0.000;QD=14.54;ReadPosRankSum=0.799;SOR=0.693	GT:AD:DP:GQ:PL	0/1:12,19:31:99:459,0,277
Fvb3	28975378	.	CT	C	233.1	PASS	AC=1;AF=0.250;AN=4;BaseQRankSum=0.051;DP=55;ExcessHet=3.0103;FS=2.771;MLEAC=1;MLEAF=0.250;MQ=47.85;MQRankSum=-1.185;QD=5.83;ReadPosRankSum=-2.767;SOR=1.270	GT:AD:DP:GQ:PL	0/1:26,14:40:99:241,0,606
Fvb4	7561821	.	G	GTCCC	135.92	PASS	AC=1;AF=0.250;AN=4;BaseQRankSum=0.693;DP=23;ExcessHet=3.0103;FS=0.000;MLEAC=1;MLEAF=0.250;MQ=22.86;MQRankSum=-1.485;QD=11.33;ReadPosRankSum=0.284;SOR=0.120	GT:AD:DP:GQ:PL	0/1:8,4:12:99:144,0,324
Fvb5	21420237	.	T	TA	625.9	PASS	AC=1;AF=0.250;AN=4;BaseQRankSum=-1.267;DP=42;ExcessHet=3.0103;FS=0.000;MLEAC=1;MLEAF=0.250;MQ=43.89;MQRankSum=3.722;QD=19.56;ReadPosRankSum=2.092;SOR=0.584	GT:AD:DP:GQ:PL	0/1:9,23:32:99:634,0,203

## Sheet: HS_rep4
CHROM	POS	ID	REF	ALT	QUAL	FILTER	INFO	FORMAT	HS_rep4
Fvb1	21975324	.	C	T	88.91	PASS	AC=1;AF=0.250;AN=4;BaseQRankSum=0.559;DP=25;ExcessHet=3.0103;FS=16.628;MLEAC=1;MLEAF=0.250;MQ=37.38;MQRankSum=-1.637;QD=6.84;ReadPosRankSum=0.542;SOR=0.002	GT:AD:DP:GQ:PL	0/1:9,4:13:97:97,0,303
Fvb3	18634591	.	G	T	90.92	PASS	AC=1;AF=0.250;AN=4;BaseQRankSum=0.761;DP=18;ExcessHet=3.0103;FS=0.000;MLEAC=1;MLEAF=0.250;MQ=39.23;MQRankSum=-1.085;QD=10.10;ReadPosRankSum=-0.712;SOR=0.061	GT:AD:DP:GQ:PL	0/1:6,3:9:99:99,0,181
Fvb4	4222310	.	G	A	250.91	PASS	AC=1;AF=0.250;AN=4;BaseQRankSum=0.581;DP=45;ExcessHet=3.0103;FS=1.554;MLEAC=1;MLEAF=0.250;MQ=60.00;MQRankSum=0.000;QD=11.95;ReadPosRankSum=0.386;SOR=0.996	GT:AD:DP:GQ:PL	0/1:13,8:21:99:259,0,434
Fvb6	21655322	.	T	G	298.91	PASS	AC=1;AF=0.250;AN=4;BaseQRankSum=0.843;DP=38;ExcessHet=3.0103;FS=3.737;MLEAC=1;MLEAF=0.250;MQ=60.00;MQRankSum=0.000;QD=13.00;ReadPosRankSum=2.010;SOR=0.216	GT:AD:DP:GQ:PL	0/1:14,9:23:99:307,0,481
Fvb6	24727864	.	C	T	208.91	PASS	AC=1;AF=0.250;AN=4;BaseQRankSum=-0.405;DP=45;ExcessHet=3.0103;FS=9.190;MLEAC=1;MLEAF=0.250;MQ=57.85;MQRankSum=0.141;QD=8.36;ReadPosRankSum=-2.020;SOR=1.780	GT:AD:DP:GQ:PL	0/1:17,8:25:99:217,0,606
Fvb6	31834167	.	C	T	113.09	PASS	AC=1;AF=0.250;AN=4;BaseQRankSum=1.053;DP=33;ExcessHet=3.0103;FS=8.470;MLEAC=1;MLEAF=0.250;MQ=27.64;MQRankSum=0.276;QD=7.54;ReadPosRankSum=-0.508;SOR=3.069	GT:AD:DP:GQ:PL	0/1:10,5:15:99:121,0,256
contig_16	40909	.	G	A	143.93	PASS	AC=1;AF=0.250;AN=4;BaseQRankSum=0.736;DP=42;ExcessHet=3.0103;FS=1.684;MLEAC=1;MLEAF=0.250;MQ=35.69;MQRankSum=1.269;QD=7.20;ReadPosRankSum=-1.960;SOR=1.270	GT:AD:DP:GQ:PL	0/1:14,6:20:99:152,0,333
contig_9	53024	.	A	AGG	97.88	PASS	AC=1;AF=0.250;AN=4;BaseQRankSum=-1.323;DP=26;ExcessHet=3.0103;FS=0.000;MLEAC=1;MLEAF=0.250;MQ=47.92;MQRankSum=0.036;QD=8.90;ReadPosRankSum=2.062;SOR=0.412	GT:AD:DP:GQ:PL	0/1:7,4:11:99:106,0,177

[truncated: 17 more sheets: HS_rep5, HS_rep6, LL_rep1, LL_rep2, LL_rep3, LL_rep4, LL_rep5, LL_rep6, HL_rep1, HL_rep2, HL_rep3, HL_rep4, HL_rep5, HL_rep6, CA_rep1, CA_rep2, CA_rep3]
