# Supplementary material for: Global characterization of somatic mutations and DNA methylation changes during vegetative propagation in strawberries
Source: HighWire-hosted journal article supplement (doi:10.1101/gr.279378.124), 2024-10-01
Supplement: Supplemental_Data.zip [file Supplemental_Tables.xlsx]

## Sheet: Supplemental Table 1
Supplemental Table 1. Summary of read statistics for all samples.
Sample ID	Original plant or location	Clean reads	Mapped percentage	Depth (×)
CK1	/	52371352	0.9526	35.61
CK2	/	64414330	0.9782	43.8
CK3	/	60882454	0.9821	41.05
LS_rep1	CK1	60378958	0.9874	41.1
LS_rep2	CK1	68660028	0.9887	46.74
LS_rep3	CK1	53589004	0.974	36.48
LS_rep4	CK2	47996656	0.986	32.21
LS_rep5	CK2	57761032	0.9897	39.32
LS_rep6	CK2	55858598	0.989	38.02
HS_rep1	CK1	51041926	0.9652	34.7
HS_rep2	CK1	56600402	0.9876	38.53
HS_rep3	CK1	60972712	0.989	41.5
HS_rep4	CK2	53211478	0.9878	36.18
HS_rep5	CK2	57287172	0.9892	39
HS_rep6	CK2	57953952	0.9771	39.45
LL_rep1	CK2	52000100	0.9882	35.4
LL_rep2	CK2	56291144	0.9898	38.32
LL_rep3	CK2	57710600	0.9902	39.28
LL_rep4	CK2	57422848	0.983	39.09
LL_rep5	CK2	57670204	0.9878	39.26
LL_rep6	CK2	54418728	0.9884	37.04
HL_rep1	CK1	56272364	0.99	38.31
HL_rep2	CK1	54628068	0.9891	37.19
HL_rep3	CK1	57175390	0.989	38.92
HL_rep4	CK2	56947912	0.9907	38.77
HL_rep5	CK2	56682184	0.9899	38.58
HL_rep6	CK2	55268318	0.9906	37.62
CA_rep1	CK3	52778158	0.9825	35.54
CA_rep2	CK3	58510354	0.9855	39.47
CA_rep3	CK3	58517634	0.9819	39.4
HY_01	Hubei	165857088	0.9878	31.14
HY_02	Hubei	165765662	0.9898	31.12
HY_03	Hubei	169721546	0.9905	31.87
HY_04	Shanxi	171255282	0.9878	32.15
HY_05	Anhui	171319962	0.9878	32.17
HY_06	Shandong	156191930	0.9895	29.33
HY_07	Henan	163849978	0.9871	30.76
HY_08	Jiangsu	164877770	0.9877	30.96
HY_09	Jiangsu	160655830	0.984	30.16
HY_10	Hubei	156598554	0.9877	29.4
HY_11	Henan	159294232	0.9836	29.91

## Sheet: Supplemental Table 2
Supplemental Table 2. Number of mutation sites identified in the regenerated woodland strawberry plants and 12 ‘Beni hoppe’ individuals (HY_0: individuals used for genome assembly).
Sample types	Sample ID	SNV	Indels (Insertion; Deletion)	Total number of mutation	Covered bases	Mutation frequency (Mutation/covered bases)	Mutation rate for 1 year (Mutation×365/covered bases/number of days in culture)
Regenerated woodland strawberry plants	LS_rep1	21	1 (0; 1)	22	215334078	1.02 × 10-7	6.78 × 10-7
	LS_rep2	99	13 (7; 6)	112	204231154	5.48 × 10-7	3.64 × 10-6
	LS_rep3	25	6 (3; 3)	31	214898308	1.44 × 10-7	9.57 × 10-7
	LS_rep4	15	5 (2; 3)	20	214891000	9.31 × 10-8	6.18 × 10-7
	LS_rep5	32	4 (4; 0)	36	215320011	1.67 × 10-7	1.11 × 10-6
	LS_rep6	23	2 (1; 1)	25	215281784	1.16 × 10-7	7.71 × 10-7
	HS_rep1	27	6 (5; 1)	33	214651392	1.54 × 10-7	1.02 × 10-6
	HS_rep2	35	4 (3; 1)	39	215174876	1.81×10-7	1.20 ×10-6
	HS_rep3	30	8 (4; 4)	38	215219319	1.77 × 10-7	1.17 × 10-6
	HS_rep4	7	1 (1; 0)	8	214767106	3.72 × 10-8	2.47 × 10-7
	HS_rep5	121	5 (1; 4)	126	215189268	5.86 × 10-7	3.89 × 10-6
	HS_rep6	15	3 (1; 2)	18	215018567	8.37 × 10-8	5.56× 10-7
	LL_rep1	288	5 (0; 5)	293	215094212	1.36 × 10-6	1.17 × 10-6
	LL_rep2	165	4 (1; 3)	169	215033105	7.86 × 10-7	6.75 × 10-7
	LL_rep3	180	11 (1; 10)	191	215033660	8.88 × 10-7	7.63 × 10-7
	LL_rep4	171	6 (1; 5)	177	215544830	8.21 × 10-7	7.05 × 10-7
	LL_rep5	469	5 (2; 3)	474	215500155	2.20 × 10-6	1.89 × 10-6
	LL_rep6	128	6 (0; 6)	134	215383014	6.22 × 10-7	5.34 × 10-7
	HL_rep1	348	7 (6; 1)	355	215172138	1.65 × 10-6	1.42 × 10-6
	HL_rep2	655	5 (5; 0)	660	215119741	3.07 × 10-6	2.63 × 10-6
	HL_rep3	532	7 (3; 4)	539	215118557	2.51 × 10-6	2.15 × 10-6
	HL_rep4	385	8 (5; 3)	393	214954005	1.83 × 10-6	1.57 × 10-6
	HL_rep5	515	11 (4; 7)	526	215350577	2.44 × 10-6	2.10 × 10-6
	HL_rep6	652	8 (1; 7)	660	215132204	3.07 × 10-6	2.63 × 10-6
	CA_rep1	566	4 (3; 1)	570	215020830	2.65 × 10-6	1.08 × 10-5
	CA_rep2	551	12 (6; 6)	563	214654086	2.62 × 10-6	1.06 × 10-5
	CA_rep3	424	5 (1; 4)	429	214681109	2.00 × 10-6	8.10 × 10-6
‘Beni hoppe’ individuals	HY_00 (individuals used for genome assembly)	4753	1,252 (564; 688)	6005	774079838	7.76 × 10-6
	HY_01	4451	932 (399; 533)	5383	768778082	7.00 × 10-6
	HY_02	4575	1,054 (452; 602)	5629	768681594	7.32 × 10-6
	HY_03	4763	1,016 (424; 592)	5779	768495321	7.52 × 10-6
	HY_04	4398	999 (438; 561)	5397	768762555	7.02 × 10-6
	HY_05	4622	1,020 (432; 588)	5642	768715626	7.34 × 10-6
	HY_06	4254	887 (376; 511)	5141	767512316	6.70 × 10-6
	HY_07	4602	987 (411; 576)	5589	768465146	7.27 × 10-6
	HY_08	3871	860 (341; 519)	4731	767461932	6.14 × 10-6
	HY_09	4281	911 (387; 524)	5192	768241697	6.76 × 10-6
	HY_10	4193	840 (340; 500)	5033	768207366	6.55 × 10-6
	HY_11	4343	869 (356; 513)	5212	767718095	6.79 × 10-6

## Sheet: Supplemental Table 3
Supplemental Table 3. Validation of identified SNVs and indels by Sanger sequencing.
SNV detected of in regenerated woodland strawberry plants.
Chromosome	Position	Ref seq	Alt seq	Forward primer (5'→3')	Reverse primer (5'→3')	Sequencing Results
						Control	Regenerated plants
Fvb2	17428647	T	C	AGGGCAAGTAATGGGCTGACAT	GCCGAACTTCAGAAAGCACTGG	no mutation (CK1)	mutation (HS_rep3)
Fvb4	18625798	T	G	GTCTGTTTCGGGTTTGTGGA	AGATACCACACGAACTCCAGAG	no mutation (CK1)	mutation (HS_rep3)
Fvb4	24203478	T	C	GTGCTGGAAGACCAACGGTA	TCGCTGACTGGCTAATGTCTG	no mutation (CK1)	mutation (HS_rep3)
Fvb4	29826981	T	G	TGCAAGAAACTCAGTGGAA	ATCCACGTGTCAGAATCTG	no mutation (CK1)	mutation (HS_rep3)
Fvb5	17762274	G	A	CCTCTTAGTCACCTGTGAATCA	AGAACGGGGACCTGAAATG	no mutation (CK1)	mutation (HS_rep3)
Fvb5	22760452	C	T	TACACCGAAAACTTGATCCC	AAAGGCGGAGTTGTTGATG	no mutation (CK1)	mutation (HS_rep3)
Fvb6	29738365	C	T	GGACCAGCTCCGACTGATCA	ACGTAGAGCGATGGGAGAGAAA	no mutation (CK1)	mutation (HS_rep3)
Fvb6	36715039	C	T	ACTCCAAATGCATCGCAAT	GAATAAGCCTTTGTGAGATGGA	no mutation (CK1)	mutation (HS_rep3)
Fvb7	7087635	C	T	GGCACGTGACATACTCCAG	TCCAACATTCTCAACTCGCA	no mutation (CK1)	mutation (HS_rep3)
Fvb7	17604282	A	T	CCTAAAGATGTTTGCGCAT	AGCTTTCGAGTGTTGGTATA	no mutation (CK1)	mutation (HS_rep3)
Fvb2	500845	C	T	ACACATCCCCAAACTTCCTAAA	AGCAATTGCTAACTCACAGTTG	no mutation (CK1)	mutation (HS_rep2)
Fvb2	6474349	C	T	CCGAGGATTTTAGTCATTCC	ACTGACTGGTGTAGTCTTG	no mutation (CK1)	mutation (HS_rep2)
Fvb2	26485205	T	A	CAATACCAGCTTCTGAGGT	ACTGAAGCTGTCTTGCTAA	no mutation (CK1)	mutation (HS_rep2)
Fvb3	9850160	C	T	AAAGCATCATGGGCCTAAG	TTTGAACTTGTTCCGTGGTAG	no mutation (CK1)	mutation (HS_rep2)
Fvb3	26921912	T	A	TTCGACTACTTTCTAGTTTGGC	CAGCGGACTATAGGTAAGGTAT	no mutation (CK1)	mutation (HS_rep2)
Fvb3	35049977	A	C	TCTTCATCAAGTTTGTCGTG	ACTAATTTGAACGTCGCAG	no mutation (CK1)	mutation (HS_rep2)
Fvb4	3423989	G	T	AGCATGTTTCATGGAACCAC	AGAAGCAGAGTGCTTAGGC	no mutation (CK1)	mutation (HS_rep2)
Fvb4	21995097	C	T	CTTTTCCTGGCTGTTGGATTCT	AATGGTGCAAGTCTCAGGATTC	no mutation (CK1)	mutation (HS_rep2)
Fvb5	14119406	G	C	TTTCCTTCGATGTGGGGGAAAC	ACCACTTGCCTTTGACGAACC	-	no mutation (HS_rep2)
Fvb5	17915959	A	G	TGAAAGTCGATTGTAGCAGAGG	ATGCTCTAGTCCCAGCAATG	no mutation (CK1)	mutation (HS_rep2)
Fvb6	25077625	G	A	TTCAGCAGAGGTCTAGCCTGA	AACCCTCCTTCTAGCGCTTTT	no mutation (CK1)	mutation (HS_rep2)
Fvb2	12217052	G	A	TTCATTGCTGCATGTATCTC	GACACACTCAAGACCCTTA	-	no mutation (HS_rep3)
Fvb5	14119406	G	C	TTTCCTTCGATGTGGGGGAAAC	ACCACTTGCCTTTGACGAACC	-	no mutation (HS_rep3)
Fvb1	479289	C	T	CCCGATGAAAAGTGCAAACTG	AAATGGGAACGCTATCTGAAGT	no mutation (CK2)	mutation (HS_rep5)
Fvb1	3324873	T	A	GTGGTCCTTAACCTTCTGTTGT	TAGTTCTTTGGGGGGCTACT	no mutation (CK2)	mutation (HS_rep5)
Fvb1	4180607	G	A	ATTACCAACACATAAGAAGGGG	TGAGGAATGAAGCTCCTGT	no mutation (CK2)	mutation (HS_rep5)
Fvb1	11925501	T	A	CCTTTTTCTCGATCACACGG	TCAAGTTGATCAATGCCATCG	no mutation (CK2)	mutation (HS_rep5)
Fvb2	16820045	G	A	AGCTAGCATATACCAGAAATGG	AGTTGTACAAGCATCACCAA	no mutation (CK2)	mutation (HS_rep5)
Fvb2	17294339	A	C	CGAAGCTGAAGAGCAGTTCA	TTCTAGCGAGGTTTTTGGCA	no mutation (CK2)	mutation (HS_rep5)
Fvb2	19724651	G	A	CAGCCCATCACTACTAACA	AGAAACATGGGAGTCTTTCT	no mutation (CK2)	mutation (HS_rep5)
Fvb2	22474358	C	T	AAAGGTTACTAGGCGGCAGAAA	TCCTACCTGCAACATCATCTGG	no mutation (CK2)	mutation (HS_rep5)
Fvb2	23693440	T	A	AGTAAAAGGGAGTACGGATTAG	GATAATTCACCCGCAGCTA	no mutation (CK2)	mutation (HS_rep5)
Fvb2	26092605	G	T	AGCATCAGTGCAGAGGGTA	TGCAGACACATAAATCCCTAGC	no mutation (CK2)	mutation (HS_rep5)
Fvb2	27574025	G	T	TCTCTGTCCTTCAAAGTCACC	AGTACGCAGCTCTAAAGGATT	no mutation (CK2)	mutation (HS_rep5)
Fvb1	2383820	A	T	TTAGAGAGATGCAAATCAGG	TGCATGCTGGGGAAATGAGAAT	no mutation (CK3)	mutation (CA_rep1)
Fvb1	5088206	T	A	AGAATCCATATAACACATACCA	AAGACAAGCCCTGATCGAAT	no mutation (CK3)	mutation (CA_rep1)
Fvb1	5613378	T	A	TGTGCCAAGTCCGTCAACTAA	ATTCTTATTTCGGTTAATGGAT	no mutation (CK3)	mutation (CA_rep1)
Fvb1	6409695	T	A	GATGTTCAAGACCTATCCAGA	TCGTTATTGATGTTATTGTGTAT	no mutation (CK3)	mutation (CA_rep1)
Fvb1	9819382	A	T	CAATGGACATAATCAACAAAG	CCAATTAACTGAACCTAGAATAT	no mutation (CK3)	mutation (CA_rep1)
Fvb1	11379090	T	A	ACGGATGTACAGATTGCCTACA	TTGCACTAGATTTCGGTGTCTC	no mutation (CK3)	mutation (CA_rep1)
Fvb1	14666631	T	A	TTTAAAGGATGGCTGGCAGGA	TTTGTAAACCAAGGAAATTTGGA	no mutation (CK3)	mutation (CA_rep1)
Fvb1	16630301	T	A	CGGATCATGGTGAATCACCACT	GTTGCTTCTCATAACACTCCTT	no mutation (CK3)	mutation (CA_rep1)
Indels detected of in regenerated woodland strawberry plants.
Chromosome	Position	Ref seq	Alt seq	Forward primer (5'→3')	Reverse primer (5'→3')	Sequencing Results
						Control	Regenerated plants
Fvb2	735145	GT	G	CTGATTAATCAAATACAGAAATCTCGTA	ATTAATGCATTGATCAAGTGTTGGTCA	no mutation (CK3)	no mutation (CA_rep1)
Fvb7	16802778	T	TTA	GGTTGCACCAAATGTATCTCGAACCAAT	TGGAGTTATGGCCGGGAAAGACACATCTAAT	no mutation (CK3)	mutation (CA_rep1)
Fvb1	15270361	A	ACCGCTC	TCTTGGCGTGGGTGAAGAAGCAGATG	AGGTGGTCTTGGAGGTGGTCTCCGCACGA	no mutation (CK3)	mutation (CA_rep2)
Fvb3	29398983	T	TA	GGGCCGGTGCCTTGATTAATGAA	TTGAGGCGGGCTAGGATCAGAGA	no mutation (CK3)	mutation (CA_rep2)
Fvb3	37291718	CAG	C	ACTCATATATACGATTTCACAGCTCACTGA	CCAAAGCCTGGTACTACATGCCCAACTAAA	no mutation (CK3)	mutation (CA_rep2)
Fvb6	11027085	C	CT	TAGCCGACGGATTGGTTCACCTTTC	TGACGTGAGAAGACAACAAGCAG	no mutation (CK3)	mutation (CA_rep2)
Fvb6	11285826	CAT	C	CTCATTCCTATCCACTGTCTGGGAA	CTCATTCCTATCCACTGTCTGGGAA	no mutation (CK3)	mutation (CA_rep2)
Fvb3	2109667	AT	A	GTGTTCGAGTTGTAAGAAGC	ATGTTCGTTCACAAATTTAAG	no mutation (CK3)	mutation (CA_rep3)
Fvb4	3186971	AT	A	GGCATAGCTAATGTGGCAGAT	CTATAAGGAAAGAGTTAAATTGAG	no mutation (CK3)	mutation (CA_rep3)
Fvb5	15057599	TA	T	TTAGCTGTCTCATATTCTTTAG	AAGGGTATATCACCATTCTCCA	no mutation (CK3)	mutation (CA_rep3)
SNV detected of in ‘Beni hoppe’ individuals (HY_11).
Chromosome	Position	Ref seq	Alt seq	Forward primer (5'→3')	Reverse primer (5'→3')	Sequencing Results
						Genotype(0/0)	Genotype(0/1)
Chr3C	26462480	C	T	TATCCAAGGAGGACAGATTATTGT	TGGTTCGAAATGATTTACATCTAC	no mutation (HY_0)	mutation (HY_11)
Chr3C	26464680	G	A	CCCGAGAATCTTCGGTTTTGATGT	CCTATGCAACTTTAACCGTCCAAT	no mutation (HY_0)	mutation (HY_11)
Chr6B	1333124	T	G	CTTGGTTCTTCTAGGAATTTGAAAA	AGAAATCATCGGTATTATACTCTGCT	no mutation (HY_0)	mutation (HY_11)
Chr6B	1368938	A	C	ATGCATACTCATGCCTTCCGGGGCA	CCTCAGTTTTCTTTACTTCATACAT	no mutation (HY_0)	mutation (HY_11)
Chr3C	26461679	C	T	ATTCGGATCGTCATGTCCTTTCT	GCGGATAGTGAATCAACCTGCACC	no mutation (HY_0)	mutation (HY_11)
Chr3C	26464890	T	C	TAATCAAACTACGTATCCTATTGG	CGATACAACTTTAACCGTCCAATT	no mutation (HY_0)	mutation (HY_11)
Chr1A	14827064	G	A	ATCAAAATTTTGCCTGCTTTAATCC	ACAAGTAATCATTCAAGTTGTGTT	no mutation (HY_0)	mutation (HY_11)
Chr2A	4737568	G	T	AAAACCTCAAATTCAAACAAAATT	TAGTGCTCAATATGGACTAATAGT	no mutation (HY_0)	mutation (HY_11)
Chr2A	8311201	A	G	CATATAATTCTACTAACCTCATTATA	TATCGGAAGATTATGAATTACACCAT	no mutation (HY_0)	mutation (HY_11)
Chr2A	11468308	G	A	TGATGGGAATGCGTAAAGAATTGAC	GATGGTTCTAATGAGATCAAAGTT	no mutation (HY_0)	mutation (HY_11)
Chr3A	22682237	T	C	AAATTGTTACATCCTTTAAAATGA	GAACCCACGTATGTTATTCTGTAT	no mutation (HY_0)	mutation (HY_11)
Chr5A	1391693	A	G	AAGGCACTTAGAAGAATCTCGTCC	TACTCGAGATGCATTTTTCTACTT	no mutation (HY_0)	mutation (HY_11)
Chr6A	5352663	C	T	GTTTACGACGACCAATACTTCACT	TGTGTCAATGTATCTCTAGCTGAACAA	no mutation (HY_0)	mutation (HY_11)
Chr2B	12845172	G	A	AGATGTGGTTAACCATCGCAATAA	TTCCACCCTGATTCTACATAGTCT	no mutation (HY_0)	mutation (HY_11)
Chr3B	23610770	C	T	CCAAAGATTTTGAAAATAGTGCAA	AGGTCTAGCCTGAACCTTGAATTT	no mutation (HY_0)	mutation (HY_11)
Chr4B	5118238	G	A	GGCCACCAATCCAAACAAGCCCTAT	TAATCCACTACAATTTCCAGGGTT	no mutation (HY_0)	mutation (HY_11)
Chr5B	15658884	C	T	AAGGACTCATAGACAAAATAATATT	ATCAAATTAAGGATTCTGTAAACGAAT	no mutation (HY_0)	no mutation (HY_11)
Chr5B	21789626	G	A	TTGATGATTTGATAGAATGGAATGGG	GATTCTGATACTTAGGATTGCAGTG	no mutation (HY_0)	mutation (HY_11)
Chr3C	26454147	T	C	CACGTTCTTATGTGGGACTTGCAG	ATGCAGTAAAATCTCAACTTAAAG	no mutation (HY_0)	no mutation (HY_11)
Chr6C	11023941	G	A	GGTCTTGGAAATTTTGTACTATGTA	CCTCCTTGCCCCGCAGTCTAACTT	no mutation (HY_0)	mutation (HY_11)
Chr1D	11457070	T	C	GCATCTTAAATTGAGACATGTTTT	TTATCGAAAATTCAAAAAAGGCAT	no mutation (HY_0)	mutation (HY_11)
Chr2D	14472612	C	G	TTCTGAATGTTCAATTTTGATCTGA	TTACTTTAAGTTTTCTGAGGTATGT	no mutation (HY_0)	mutation (HY_11)
Chr2D	27454289	A	C	TAAGGGAATGAAGAAATACCTTGA	ACTTATGTTTTTTGGAATGGTCAT	no mutation (HY_0)	mutation (HY_11)
Chr3D	12648520	C	T	AAGCCCAGCAAGAACATGCCTCAT	CAATCTATTTCTTTGTCCACAAGA	no mutation (HY_0)	mutation (HY_11)
Chr6D	12560777	G	C	AACGGAGCGTGGTCCAATCTTATG	TTACCGACCGTACCCGGGCTTGGCA	no mutation (HY_0)	no mutation (HY_11)

## Sheet: Supplemental Table 4
Supplemental Table 4. Summary of read statistics for all Whole-Genome Bisulfite Sequencing (WGBS) samples.
Sample ID	Original plants	Clean reads	Mapped percentage	Conversion rate	Depth (×)
CK1	/	66538780	0.8465	0.9945	42.27
CK2	/	56311298	0.8606	0.9985	38.33
CK3	/	59328172	0.8997	0.9951	35.99
HS_rep1	CK1	55419214	0.8903	0.9941	34.34
HS_rep2	CK1	61273352	0.7879	0.9969	38.93
HS_rep3	CK1	59834440	0.8919	0.9974	37.37
HS_rep4	CK2	69009462	0.8476	0.9986	46.98
HS_rep5	CK2	64453856	0.8979	0.9946	39.93
HS_rep6	CK2	85968522	0.8813	0.9966	53.28
HL_rep1	CK1	57947300	0.844	0.9975	36.82
HL_rep2	CK1	54665272	0.849	0.9974	34.73
HL_rep3	CK1	71282726	0.8596	0.9971	45.29
HL_rep4	CK2	59058980	0.8788	0.9972	36.83
HL_rep5	CK2	55141488	0.8411	0.9972	33.82
HL_rep6	CK2	55386948	0.8377	0.9971	34.07
HL_rep5_R1_rep1	HL_rep5	57782348	0.8939	0.9955	35.32
HL_rep5_R1_rep2	HL_rep5	56228010	0.903	0.9955	34.55
HL_rep5_R1_rep3	HL_rep5	57626708	0.8966	0.9956	35.26
CA_rep1	CK3	58621424	0.896	0.9952	35.68
CA_rep2	CK3	58629534	0.8965	0.9952	35.74
CA_rep3	CK3	54788894	0.9076	0.9953	33.37

## Sheet: Supplemental Table 5
Supplemental Table 5. Average methylation levels at the CG, CHG and CHH contexts in the regenerated woodland strawberry plants.
	Sample ID	% of CG methylation	% of CHG methylation	% of CHH methylation
The regenerants from CK1	CK1	0.5423	0.241	0.029
	HS_rep1	0.5567	0.2392	0.0308
	HS_rep2	0.5128	0.2151	0.0199
	HS_rep3	0.506	0.2217	0.0255
	HL_rep1	0.5103	0.2264	0.0257
	HL_rep2	0.5016	0.2124	0.02
	HL_rep3	0.5352	0.2448	0.027
The regenerants from CK2	CK_2	0.5694	0.2434	0.0195
	HS_rep4	0.6042	0.276	0.0262
	HS_rep5	0.5555	0.2438	0.0295
	HS_rep6	0.5486	0.2502	0.0279
	HL_rep4	0.514	0.2212	0.021
	HL_rep5	0.4891	0.2104	0.0241
	HL_rep6	0.4978	0.2155	0.0234
	HL_rep5_R1_rep1	0.5042	0.2189	0.0266
	HL_rep5_R1_rep2	0.5118	0.2199	0.0273
	HL_rep5_R1_rep3	0.5104	0.2208	0.027
The regenerants from CK3	CK3	0.5132	0.2126	0.0216
	CA_rep1	0.4839	0.1985	0.019
	CA_rep2	0.5012	0.2228	0.0224
	CA_rep3	0.489	0.2079	0.0226

## Sheet: Supplemental Table 6
Supplemental Table 6. Number of the CG-DMR, CHG-DMR and CHH-DMR regions in the regenerated woodland strawberry plants.
Sample ID	CG			CHG			CHH
	Hyper	Hypo	Total	Hyper	Hypo	Total	Hyper	Hypo	Total
HS_rep1	2375	6332	8707	4196	3773	7969	7612	2808	10420
HS_rep2	2363	9943	12306	2039	7352	9391	1367	10728	12095
HS_rep3	820	5638	6458	2224	1693	3917	6150	4311	10461
HS_rep4	3153	3387	6540	3601	1130	4731	4601	424	5025
HS_rep5	9341	7257	16598	8864	2048	10912	15347	369	15716
HS_rep6	5982	2694	8676	7324	918	8242	11318	470	11788
HL_rep1	6477	14727	21204	15187	3985	19172	6053	5440	11493
HL_rep2	4140	13195	17335	9342	5161	14503	2035	10713	12748
HL_rep3	5917	19670	25587	11483	5125	16608	4205	4869	9074
HL_rep4	6773	10863	17636	8745	2697	11442	4775	1677	6452
HL_rep5	6397	21846	28243	13848	5373	19221	15498	1207	16705
HL_rep6	6501	10481	16982	17770	2536	20306	11364	1247	12611
CA_rep1	3392	24853	28245	8335	9574	17909	2814	6229	9043
CA_rep2	7990	23769	31759	22936	5142	28078	5224	4356	9580
CA_rep3	4785	15133	19918	16340	4093	20433	7310	3724	11034

## Sheet: Supplemental Table 7
Supplemental Table 7. Summary of sequencing data used for ‘Beni hoppe’ genome assembly.
Sequencing method	Number of clean reads	Total bases	Depth (×)
Pacbio HIFI	4067182	81069154135	101.33
Hi-C	1079852294	161977844100	202.47
Illumina	275906563	82771968900	103,46
ONT Ultra-long	1173115	45653636499	57.07

## Sheet: Supplemental Table 8
Supplemental Table 8. Genome size and heterozygosity (H) estimation by k-mer analysis.
Genome size and heterozygosity (H) estimation by k-mer
K	Peak	Genome size	H	Repeat	Unique
21	40	725880137	0.0129	0.6955	0.304

## Sheet: Supplemental Table 9
Supplemental Table 9. Summary of the FaBen, hap1 and hap2 genome assemblies.
	FaBen	hap1	hap2
Number	45	45	41
Total size (bp)	798774654	784959835	789172298
Contig N50 (bp)	28726084	26721669	27907497
Percentage of mapped reads (%)	0.9892	0.9937	0.9955
Number of gaps	0	1800	1000
Complete BUSCOs	1591 (98.6%)	1587 (98.4%)	1589 (98.5%)
Complete and single-copy BUSCOs	79	80	87
Complete and duplicated BUSCOs	1512	1507	1502
Fragmented BUSCOs	2	3	2
Missing BUSCOs	21	24	23
Total BUSCO groups searched	1614	1614	1614

## Sheet: Supplemental Table 10
Supplemental Table 10. Predicted telomeres in the FaBen, hap1 and hap2 genome assemblies. “0” in the last two columns indicates no telomere was found.
Genome	Chr ID	Chr length	Status	Repeat number in the left telomere	Repeat number in the right telomere
FaBen	Chr1A	23149569	right	0	192
	Chr2A	28961091	both	224	208
	Chr3A	31353655	both	185	174
	Chr4A	27536866	both	184	203
	Chr5A	26402797	both	159	152
	Chr6A	34506185	both	253	210
	Chr7A	23015859	both	175	173
	Chr1B	26316272	right	0	191
	Chr2B	28303612	left	180	0
	Chr3B	31639791	both	222	218
	Chr4B	31286720	both	189	185
	Chr5B	28793356	both	191	182
	Chr6B	36299098	both	199	206
	Chr7B	23817421	left	150	0
	Chr1C	27853836	left	158	0
	Chr2C	29057637	both	201	179
	Chr3C	31462267	both	163	194
	Chr4C	27304949	both	212	189
	Chr5C	26990657	both	201	177
	Chr6C	34747498	both	208	183
	Chr7C	23791506	both	200	176
	Chr1D	26721669	both	167	145
	Chr2D	28726084	both	178	140
	Chr3D	30837084	both	174	177
	Chr4D	25063808	both	157	158
	Chr5D	26432324	both	203	169
	Chr6D	35710348	both	192	179
	Chr7D	21826226	left	199	0
Hap1	Chr1A	22898546	right	0	192
	Chr2A	28351711	left	224	0
	Chr3A	30840637	right	0	192
	Chr4A	26981977	both	203	183
	Chr5A	26495703	both	152	158
	Chr6A	34407427	both	210	253
	Chr7A	23013932	both	175	171
	Chr1B	26128059	left	199	0
	Chr2B	27297965	left	180	0
	Chr3B	31719076	both	216	220
	Chr4B	30652526	both	185	183
	Chr5B	28390981	both	191	175
	Chr6B	35863601	both	173	199
	Chr7B	24061921	left	150	0
	Chr1C	25621226	right	0	156
	Chr2C	27843224	both	181	201
	Chr3C	31082887	left	152	0
	Chr4C	27335339	left	184	0
	Chr5C	26072030	both	172	178
	Chr6C	33888853	left	183	0
	Chr7C	22149238	right	0	185
	Chr1D	26721669	both	145	163
	Chr2D	27975584	both	141	177
	Chr3D	31700274	left	179	0
	Chr4D	25199168	right	0	184
	Chr5D	26354832	both	203	169
	Chr6D	33330900	both	179	140
	Chr7D	21820465	right	0	197
Hap2	Chr1A	23099999	left	192	0
	Chr2A	28830416	both	204	218
	Chr3A	31352766	both	185	171
	Chr4A	27534325	both	184	203
	Chr5A	26347962	both	159	152
	Chr6A	33893426	both	209	253
	Chr7A	22478702	both	185	163
	Chr1B	26532172	left	182	0
	Chr2B	28291717	left	180	0
	Chr3B	31652879	both	222	216
	Chr4B	31177786	both	199	189
	Chr5B	28722110	both	182	191
	Chr6B	35956563	left	203	0
	Chr7B	23328921	right	0	157
	Chr1C	25093460	right	0	154
	Chr2C	27907497	left	201	0
	Chr3C	31462270	both	195	163
	Chr4C	27087001	both	179	189
	Chr5C	26484615	left	201	0
	Chr6C	34724075	both	183	208
	Chr7C	22229101	right	0	176
	Chr1D	25973062	left	140	0
	Chr2D	28278792	both	143	141
	Chr3D	29572775	both	159	182
	Chr4D	25114170	both	201	158
	Chr5D	27180865	right	0	195
	Chr6D	35656698	both	192	182
	Chr7D	21125252	both	183	209

[truncated: 5 more sheets: Supplemental Table 11, Supplemental Table 12, Supplemental Table 13, Supplemental Table 14, Supplemental Table 15]
